# Supplementary material
Source: PubMed Central journal article supplement (PMC2531207)

## ***Supporting Information***

**Manuscript for:** *Journal of the American Chemical Society*

### **Synthesis and Biological Activity of Phospholipase C-Resistant Analogues of Phosphatidylinositol 4, 5-bisphosphate**

Honglu Zhang,<sup>1</sup> Yong Xu,<sup>1</sup> Zheng Zhang, Emily R. Liman,<sup>2</sup> Glenn D Prestwich<sup>1\*</sup>

<sup>1</sup>Department of Medicinal Chemistry, The University of Utah, 419 Wakara Way,  
Suite 205, Salt Lake City, Utah 84108-1257 USA  
Phone: +1-801-585-9051. Fax: +1-801-585-9053. Email: [gprestwich@pharm.utah.edu](mailto:gprestwich@pharm.utah.edu)

<sup>2</sup>Department of Biological Sciences and Program in Neuroscience, University of Southern  
California, 3641 Watt way, Los Angeles, California 90089-2520 USA

S3-S12      **Experimental details for chemical synthesis.**

S12            **General information for NMR spectra.**

S13      **General experimental protocols for biological studies.**

S14-S53      **Spectroscopic data for typical compounds:**

S14-S15,  $^1\text{H}$  NMR and  $^{19}\text{F}$  NMR of compound **7**.

S16-S18,  $^1\text{H}$  NMR,  $^{31}\text{P}$  NMR, and  $^{13}\text{C}$  NMR of compound **11**.

S19-S22,  $^1\text{H}$  NMR,  $^{19}\text{F}$  NMR,  $^{31}\text{P}$  NMR and  $^{13}\text{C}$  NMR of compound **12**.

S23-S26,  $^1\text{H}$  NMR,  $^{19}\text{F}$  NMR,  $^{31}\text{P}$  NMR and  $^{13}\text{C}$  NMR of compound **13**.

S27-S30,  $^1\text{H}$  NMR,  $^{19}\text{F}$  NMR,  $^{31}\text{P}$  NMR and  $^{13}\text{C}$  NMR of compound **14a**.

S31-S34,  $^1\text{H}$  NMR,  $^{19}\text{F}$  NMR,  $^{31}\text{P}$  NMR and  $^{13}\text{C}$  NMR of compound **14b**.

S35-S38,  $^1\text{H}$  NMR,  $^{19}\text{F}$  NMR,  $^{31}\text{P}$  NMR and  $^{13}\text{C}$  NMR of compound **14c**.

S39-S41,  $^1\text{H}$  NMR,  $^{19}\text{F}$  NMR, and  $^{31}\text{P}$  NMR of compound **1**.

S42-S44,  $^1\text{H}$  NMR,  $^{19}\text{F}$  NMR, and  $^{31}\text{P}$  NMR of compound **2**.

S45-S47,  $^1\text{H}$  NMR,  $^{19}\text{F}$  NMR, and  $^{31}\text{P}$  NMR of compound **3**.

S48-S50,  $^1\text{H}$  NMR,  $^{19}\text{F}$  NMR, and  $^{31}\text{P}$  NMR of compound **4**.

S51-S53,  $^1\text{H}$  NMR,  $^{19}\text{F}$  NMR, and  $^{31}\text{P}$  NMR of compound **5**.

## Experimental details for chemical synthesis.

**General.** Chemicals were purchased from Aldrich and Acros Chemical Corporation and used without prior purification. Solvents were reagent-grade and distilled before use: CH<sub>2</sub>Cl<sub>2</sub> was distilled from CaH<sub>2</sub> and THF was distilled from sodium wire. TLC used precoated silica gel glass sheets (EM SCIENCE silica gel 60F<sub>254</sub>). Flash chromatography (FC) employed Whatman 230~400 mesh ASTM silica gel. NMR spectra were recorded on a Varian INOVA 400 at 400 MHz (<sup>1</sup>H), 101 MHz (<sup>13</sup>C), 162 MHz (<sup>31</sup>P) and 376 MHz (<sup>19</sup>F) at 25 °C. Chemical shifts are reported in ppm with TMS as internal standard ( $\delta$  = 0.00); <sup>31</sup>P, 85% H<sub>3</sub>PO<sub>4</sub> ( $\delta$ =0.00); <sup>19</sup>F, CFCl<sub>3</sub> ( $\delta$ =0.00). Low- and high-resolution mass spectra were obtained on HP5971A MSD and Finnigan MAT95 double focusing mass spectrometer (MS) instruments, respectively. DiC<sub>8</sub>-PtdIns(4,5)P<sub>2</sub> was obtained from Echelon Biosciences (Salt Lake City, UT).

**(2S)-1,2-O-cyclohexylidenebut-3-ene-4-bromo-4-fluoro-1,2-diol (7).** To a solution of triphenylphosphine (6.29 g, 24 mmol), tribromofluoromethane (2.4 mL, 24 mmol), and aldehyde **6** (3.4 g, 20 mmol) in anhydrous THF (150 mL), a solution of diethylzinc in hexane (24 mL, 24 mmol) was added dropwise over 1 h at room temperature under argon. The mixture was stirred at room temperature for another 1 h, and concentrated under reduced pressure, the residue was then dissolved in Et<sub>2</sub>O and filtered through a short silica gel column, washed with Et<sub>2</sub>O. the filtrate was concentrated, and the residue was chromatographed on silica gel (petroleum ether (30 - 50°C)/Et<sub>2</sub>O = 100 : 2) to afford bromofluoroolefin **7** (4 g, 76%) as a colorless liquid. Compound **7** is a inseparable *E/Z* mixture (1:1, as determined by <sup>19</sup>F NMR).

$[\alpha]_{20}^D = -4.2$  (*c* 1.1, CHCl<sub>3</sub>); <sup>1</sup>H NMR(400 MHz, CDCl<sub>3</sub>)  $\delta$  5.60 (dd, *J* = 12.0, 8.4 Hz, 0.5H),

5.19 (dd,  $J = 30.0, 8.4$  Hz, 0.5H), 4.89 (q,  $J = 7.6$  Hz, 0.5H), 4.62 (qd,  $J = 7.6, 2.0$  Hz, 0.5H), 4.12 (dt,  $J = 10.0, 6.4$  Hz, 1H), 3.62 (q,  $J = 8.4$  Hz, 1H), 1.61 (m, 8H), 1.39 (m, 2H).  $^{19}\text{F}$  NMR (376MHz,  $\text{CDCl}_3$ )  $\square$  -66.23 (d,  $J = 12.4$  Hz, 0.5F), -71.25 (d,  $J = 32.4$  Hz, 0.5F).

**Benzyl hydrogen 1-[2,3,6-*O*-tris(methoxymethylene)-4,5-*O*-bis(dibenzoxy)phosphoryl] -*myo*-inositol] phosphite (11).** A mixture of inositol **9** (100 mg, 0.12 mmol), benzyl *N, N, N, N*-tetraisopropylaminophosphoramidite (84.6 mg, 0.25 mmol) and *N, N*-diisopropylethylammonium 1*H*-tetrazole (27 mg, 0.16 mmol) in dry  $\text{CH}_2\text{Cl}_2$  was stirred at rt for 1 d, then a second portion of phosphoramidite (84.6 mg, 0.25 mmol) and *N, N*-diisopropylethylammonium 1*H*-tetrazole (27 mg, 0.16 mmol) was added and stirred for an additional day. TLC show the end of the reaction. Then 1*H*-tetrazole (31 mg, 0.3 mmol) was added and stirred for 10 min, followed by addition of water (0.1 mL) and the entire mixture was stirred for 1h. then the mixture was diluted with  $\text{CH}_2\text{Cl}_2$ , washed with brine, dried over  $\text{Na}_2\text{SO}_4$ , concentrated in vacuo, and purified on silica gel (hexane/acetone, 1:1) to give *H*-phosphonate **11**(90 mg, 76%).

$[\square]_{20}^{\text{D}} = -27.4$  ( $c$  1.255,  $\text{CHCl}_3$ );  $^1\text{H}$  NMR(400 MHz,  $\text{CDCl}_3$ )  $\square$  8.00 (d,  $J = 51.2$  Hz, 0.5H), 7.36 - 7.22 (m, 25H), 6.10 (d,  $J = 40.8$  Hz, 0.5H), 5.15 – 4.84 (m, 10H), 4.79 – 4.56 (m, 4H), 4.52 (dd,  $J = 7.2, 1.6$  Hz, 1H), 4.44 - 4.30 (m, 3H), 4.17 (s, 1H), 4.09 – 4.02 (m, 2H), 3.52 (ddd,  $J = 25.6, 10.0, 1.6$  Hz, 1H), 3.39 – 3.20 (m, 9H);  $^{13}\text{C}$  NMR (101 MHz,  $\text{CDCl}_3$ )  $\square$  136.31, 136.25, 136.21, 136.13, 136.05, 135.97, 135.71, 135.66, 129.07, 129.05, 128.94, 128.74, 128.73, 128.66, 128.63, 128.57, 128.52, 128.36, 128.33, 128.29, 128.15, 128.09, 99.66, 99.14, 97.78, 97.68, 97.15, 97.08, 79.04, 78.85, 77.72, 77.37, 76.44, 75.26, 74.86, 74.79, 74.66, 74.60, 70.05, 70.00, 69.94, 69.81, 69.75, 69.72, 69.67, 69.53, 69.49, 69.46, 67.81, 67.75, 67.25, 67.19, 56.85, 56.82, 56.13, 56.12, 56.05, 55.97;  $^{31}\text{P}$  NMR (162 MHz,  $\text{CDCl}_3$ )  $\square$  10.44, 9.21, -0.14, -0.16, -0.20; MS (MALDI) 1009.50  $[\text{M} + \text{Na}]^+$ ; MALDI-HRMS

$[M + Na]^+$  calcd for  $C_{47}H_{57}O_{17}P_3Na$  1009.2706, found 1009.2684.

**Benzyl 1-[2,3,6-*O*-tris(methoxymethylene)-4,5-*O*-bis(dibenzoxyphosphoryl) -*myo*-inositol] 4-(*sn*-3,4-*O*-cyclohexylidene-1-fluoro-1-buten-1-yl) phosphonate (12).** To a 4 mL screw cap reaction vial charged with *H*-Phosphite **11** (300 mg, 0.304 mmol) was added  $Pd(OAc)_2$  (12 mg, 0.083 mmol), dppf (60 mg, 0.106 mmol), bromofluoroolefin **7** (0.24 mL) and propylene oxide (0.5 mL) under argon. Then added dry THF to full. The resulting yellow solution was heated in 70 °C oil bath for 10 h. After cooling to room temperature, the solvent was removed in vacuum and the crude residue was purified by column chromatography ( $SiO_2$ , hexane/acetone 7:3) to afford compound **12** (218 mg, 62%) as a colorless oil.

$[\alpha]_{20}^D = -18.8$  (*c* 1.14,  $CHCl_3$ );  $^1H$  NMR (400 MHz,  $CDCl_3$ )  $\delta$  7.38 – 7.24 (m, 25H), 6.17 – 5.95 (m, 1H), 5.19 – 4.84 (m, 12H), 4.77 (d, *J* = 2.1 Hz, 1H), 4.75 (s, 1H), 4.73 – 4.67 (m, 1H), 4.64 – 4.52 (m, 2H), 4.43 (t, *J* = 6.8 Hz, 1H), 4.40 – 4.32 (m, 1H), 4.31 – 4.27 (m, 1H), 4.23 (td, *J* = 9.6, 2.0 Hz, 1H), 4.13 (td, *J* = 10.0, 4.0 Hz, 1H), 4.06 (td, *J* = 6.4, 2.0 Hz, 1H), 3.61 (td, *J* = 8.4, 1.6 Hz, 0.3 H), 3.50 (td, *J* = 8.4, 1.6 Hz, 1.7H), 3.38 – 3.21 (m, 9H), 1.62 – 1.56 (m, 8H), 1.39 (m, 2H);  $^{13}C$  NMR (101 MHz,  $CDCl_3$ )  $\delta$  136.38, 136.33, 136.31, 136.25, 136.20, 136.12, 135.31, 129.15, 129.11, 128.98, 128.93, 128.69, 128.64, 128.62, 128.58, 128.50, 128.47, 128.40, 128.32, 128.28, 128.25, 128.16, 125.55, 125.26, 110.96, 110.88, 98.89, 97.83, 97.76, 97.07, 78.81, 77.42, 76.09, 76.02, 75.93, 75.50, 75.14, 75.06, 74.70, 69.95, 69.90, 69.79, 69.74, 69.68, 69.63, 69.59, 69.53, 69.47, 69.42, 69.30, 69.26, 69.18, 68.94, 68.88, 68.82, 68.74, 68.63, 57.54, 56.93, 56.55, 56.15, 56.11, 56.05, 36.34, 35.39, 25.25, 24.09, 24.05;  $^{19}F$  NMR (376 MHz,  $CDCl_3$ )  $\delta$  -126.80 (m, 1F);  $^{31}P$  NMR (162 MHz,  $CDCl_3$ )  $\delta$  5.49 (1P), -0.16 (1P), -0.18 (1P); MS (MALDI) 1193.41  $[M + Na]^+$ ; MALDI-HRMS  $[M + Na]^+$  calcd for  $C_{57}H_{70}FO_{19}P_3Na$  1193.3606, found 1193.3616.

**Benzyl 1-[2,3,6-*O*-tris(methoxymethylene)-4,5-*O*-bis(dibenzoxyphosphoryl) -*myo*-inositol]-4-(*sn*-3,4-dihydroxy-1-fluoro-1-buten-1-yl) phosphonate (13).** A solution of compound **12** (100 mg, 0.085 mmol) in THF (1 mL) was cooled to 0 °C, to this solution was added pre-cooled 0 °C 60% aqueous trifluoroacetic acid (4 mL), the resulting mixture was stirred at 0 °C for 1 h. After neutralized with saturated sodium hydrogen carbonate solution at 0 °C, the mixture was extracted with ethyl acetate. The extract was washed with water, dried over Na<sub>2</sub>SO<sub>4</sub> and concentrated to leave a residue, the crude residue was purified by column chromatography (SiO<sub>2</sub>, ethyl acetate/methanol 10:1) to afford compound **13** (80 mg, 86%) as a colorless oil.

$[\alpha]_{20}^D = -17.0$  (*c* 1.27, CHCl<sub>3</sub>); <sup>1</sup>H NMR(400 MHz, CDCl<sub>3</sub>)  $\delta$  7.29 – 7.17 (m, 25H), 6.14 – 5.96 (m, 1H), 5.15 – 4.82 (m, 10H), 4.76 (q, *J* = 9.6 Hz, 1H), 4.68 (d, *J* = 2.0 Hz, 2H), 4.63 (d, *J* = 6.4 Hz, 2H), 4.56 (q, *J* = 6.4 Hz, 1H), 4.47 (d, *J* = 7.6 Hz, 1H), 4.39 – 4.17 (m, 4H), 4.04 (qd, *J* = 9.2, 2.8 Hz, 1H), 3.56 – 3.45 (m, 3H), 3.31 – 3.16 (m, 9H); <sup>13</sup>C NMR (101 MHz, CDCl<sub>3</sub>)  $\delta$  136.25, 136.18, 136.04, 135.97, 135.91, 135.26, 129.11, 129.08, 129.06, 128.94, 128.72, 128.67, 128.64, 128.61, 128.58, 128.51, 128.47, 128.37, 128.34, 128.30, 128.28, 128.17, 128.15, 126.42, 126.14, 98.93, 98.82, 97.70, 97.53, 97.43, 97.14, 78.84, 77.59, 77.48, 77.28, 76.96, 75.97, 75.92, 75.63, 75.24, 75.11, 74.91, 74.79, 70.09, 70.03, 69.97, 69.80, 69.75, 69.51, 69.46, 69.38, 69.34, 69.08, 66.68, 66.08, 65.47, 65.34, 57.16, 57.07, 56.96, 56.24, 56.18, 56.15, 56.10, 56.04; <sup>19</sup>F NMR (376 MHz, CDCl<sub>3</sub>)  $\delta$  -126.00 (m, 1F); <sup>31</sup>P NMR (162 MHz, CDCl<sub>3</sub>)  $\delta$  5.80 (1P), -0.20 (1P), -0.26 (1P); MS (MALDI) 1113.35 [M + Na]<sup>+</sup>; MALDI-HRMS [M + Na]<sup>+</sup> calcd for C<sub>51</sub>H<sub>62</sub>FO<sub>19</sub>P<sub>3</sub>Na 1113.3123, found 1113.2980.

**Benzyl 1-[2,3,6-*O*-tris(methoxymethylene)-4,5-*O*-bis(dibenzoxyphosphoryl) -*myo*-inositol]-4-(*sn*-3,4-*O*-dipalmitoyl-1-fluoro-1-buten-1-yl) phosphonate (14a).** A solution of

diol **13** (30 mg, 0.0275 mmol) and palmitic acid (29 mg, 0.11 mmol), EDCI (42 mg, 0.22 mmol) and DMAP (14 mg, 0.11 mmol) in 3 mL of dry CH<sub>2</sub>Cl<sub>2</sub> was stirred overnight at room temperature. The reaction mixture was diluted with CH<sub>2</sub>Cl<sub>2</sub>, washed with water and dried with Na<sub>2</sub>SO<sub>4</sub>. concentration of the solvent gave a crude residue, which was purified by column chromatography (SiO<sub>2</sub>, ethyl acetate/hexane 3:2 to 2:1) to afford the phosphoinositide **14a** (36 mg, 84%) as a colorless oil.  $[\alpha]_{20}^D = -12.7$  (*c* 1.13, CHCl<sub>3</sub>); <sup>1</sup>H NMR(400 MHz, CDCl<sub>3</sub>)  $\delta$  7.31 - 7.16 (m, 25H), 6.00 - 5.82 (m, 1H), 5.80 - 5.70 (m, 1H), 5.13 - 4.84 (m, 10H), 4.80 (q, *J* = 9.2 Hz, 1H), 4.71 - 4.60 (m, 3H), 4.54 (dd, *J* = 10.8, 6.8 Hz, 1H), 4.43 (dd, *J* = 21.0, 6.8 Hz, 1 H), 4.38 - 4.24 (m, 2H), 4.22 - 4.15 (m, 2H), 4.13 - 3.95 (m, 3H), 3.45 (t, *J* = 9.6 Hz, 1H), 3.30 - 3.14 (m, 9H), 2.22 (q, *J* = 6.8 Hz, 4H), 1.52 (m, 4H), 1.18 (brs, 48H), 0.81, t = 6.8 Hz, 6H); <sup>13</sup>C NMR (101 MHz, CDCl<sub>3</sub>)  $\delta$  173.42, 172.69, 172.67, 172.63, 172.58, 136.39, 136.31, 136.21, 136.12, 136.19, 136.12, 129.21, 129.16, 129.14, 128.96, 128.68, 128.64, 128.63, 128.61, 128.57, 128.54, 128.50, 128.45, 128.40, 128.37, 128.27, 128.15, 121.76, 121.76, 121.42, 121.12, 98.92, 97.89, 97.79, 97.72, 97.15, 97.06, 96.83, 78.81, 77.47, 76.14, 75.52, 75.09, 75.04, 69.94, 69.89, 69.79, 69.73, 69.69, 69.64, 69.56, 69.45, 69.40, 69.34, 65.47, 63.71, 56.89, 56.13, 56.09, 56.02, 34.30, 34.27, 34.20, 32.15, 29.93, 29.89, 29.72, 29.60, 29.52, 29.34, 25.04, 25.00, 22.92, 14.36; <sup>19</sup>F NMR (376 MHz, CDCl<sub>3</sub>)  $\delta$  -121.50 (m, 1F); <sup>31</sup>P NMR (162 MHz, CDCl<sub>3</sub>)  $\delta$  4.95 (1P), -0.17 (2P); MS (MALDI) 1589.79 [M + Na]<sup>+</sup>; MALDI-HRMS [M + Na]<sup>+</sup> calcd for C<sub>83</sub>H<sub>122</sub>FO<sub>21</sub>P<sub>3</sub>Na 1589.7573, found 1589.7508.

**Benzyl 1-[2,3,6-*O*-tris(methoxymethylene)-4,5-*O*-bis(dibenzoxyphosphoryl) -*myo*-inositol]-4-(*sn*-3,4-*O*-dioctanoyl-1-fluoro-1-buten-1-yl) phosphonate (14b).** Was obtained from **13** in 68% yield analogously as described for compound **14a**.

$[\alpha]_{20}^D = -14.8$  (*c* 0.85, CHCl<sub>3</sub>); <sup>1</sup>H NMR(400 MHz, CDCl<sub>3</sub>)  $\delta$  7.29 -7.18 (m, 25H), 6.04 -

5.82 (m, 1H), 5.80 – 5.70 (m, 1H), 5.15 – 4.89 (m, 10H), 4.80 (q,  $J = 9.2$  Hz, 1H), 4.71 – 4.52 (m, 3H), 4.54 (dd,  $J = 10.8, 6.8$  Hz, 1H), 4.43 (dd,  $J = 21.0, 6.8$  Hz, 1H), 4.38 – 4.24 (m, 2H), 4.22 – 4.14 (m, 2H), 4.13 – 3.95 (m, 3H), 3.45 (t,  $J = 9.6$  Hz, 1H), 3.29 – 3.14 (m, 9H), 2.22 (q,  $J = 6.8$  Hz, 4H), 1.52 (m, 4H), 1.18 (br, 16H), 0.80, t = 6.8 Hz, 6H);  $^{13}\text{C}$  NMR (101 MHz,  $\text{CDCl}_3$ )  $\square$  173.41, 172.68, 172.63, 172.58, 136.39, 136.31, 136.28, 136.20, 136.12, 135.25, 135.18, 135.15, 135.12, 129.21, 129.17, 129.14, 128.97, 128.76, 128.69, 128.61, 128.55, 128.50, 128.45, 128.41, 128.36, 128.26, 128.15, 121.77, 121.48, 121.11, 98.93, 97.89, 97.78, 97.72, 97.15, 97.06, 96.82, 78.81, 77.51, 77.39, 76.20, 76.14, 75.53, 75.09, 75.04, 74.78, 74.71, 74.51, 69.94, 69.88, 69.78, 69.73, 69.68, 69.63, 69.60, 69.55, 69.45, 69.39, 69.33, 65.52, 65.47, 65.39, 65.35, 63.72, 56.89, 56.13, 56.09, 56.02, 34.29, 34.25, 34.18, 31.86, 29.92, 29.27, 29.24, 29.13, 25.03, 25.00, 24.97, 22.82, 14.29;  $^{19}\text{F}$  NMR 376MHz,  $\text{CDCl}_3$ )  $\square$  -121.57 (m, 1F);  $^{31}\text{P}$  NMR (162 MHz,  $\text{CDCl}_3$ )  $\square$  4.95 (1P), -0.18 (2P); MS (MALDI) 1365.44  $[\text{M} + \text{Na}]^+$ ; MALDI-HRMS  $[\text{M} + \text{Na}]^+$  calcd for  $\text{C}_{67}\text{H}_{90}\text{FO}_{21}\text{P}_3\text{Na}$  1365.5069, found 1365.5064.

**Benzyl 1-[2,3,6-*O*-tris(methoxymethylene)-4,5-*O*-bis(dibenzoxyphosphoryl) -*myo*-inositol]-4-(*sn*-3,4-*O*-dioleoyl-1-fluoro-1-buten-1-yl) phosphonate (14c).** Was obtained from **13** in 82% yield analogously as described for compound **14a**.  $[\alpha]_{20}^{\text{D}} = -13.7$  ( $c$  0.50,  $\text{CHCl}_3$ );  $^1\text{H}$  NMR(400 MHz,  $\text{CDCl}_3$ )  $\square$  7.20 (m, 25H), 6.00 – 5.80 (m, 1H), 5.80 – 5.68 (m, 1H), 5.27 (s, 4H), 5.11 – 4.85 (m, 10H), 4.80 (q, 1H), 4.71 – 4.60 (m, 3H), 4.54 (q,  $J = 6.8$  Hz, 1H), 4.45 (dd,  $J = 20.4, 6.8$  Hz, 1H), 4.38 -4.24 (m, 2H), 4.20 (br, 2H), 4.12 – 3.95 (m, 3H), 3.46 (t,  $J = 9.6$  Hz, 1H), 3.29 – 3.14 (m, 9H), 2.21 (t,  $J = 7.2$  Hz, 4H), 1.93 (brd,  $J = 6.0$  Hz, 8H), 1.52 (br, 4H), 1.20 (br, 40 H), 0.80 (t,  $J = 6.8$  Hz, 6H);  $^{13}\text{C}$  NMR ( $\text{CDCl}_3$ )  $\square$  176.58, 173.38, 172.65, 172.60, 172.55, 136.38, 136.31, 136.20, 136.12, 135.25, 135.19, 135.12, 130.24, 129.98, 129.92, 129.21, 129.14, 128.96, 128.68, 128.63, 128.55, 128.50, 128.45,



128.41, 128.36, 128.27, 128.16, 121.77, 121.47, 121.11, 98.92, 97.89, 97.79, 97.72, 97.15, 97.06, 96.84, 78.80, 77.50, 77.42, 76.14, 75.53, 75.11, 75.05, 74.79, 74.72, 74.52, 69.96, 69.90, 69.80, 69.74, 69.70, 69.65, 69.62, 69.57, 69.47, 69.43, 69.35, 65.49, 63.73, 56.89, 56.13, 56.08, 56.01, 34.29, 34.24, 34.17, 34.12, 32.13, 29.99, 29.75, 29.66, 29.54, 29.42, 29.35, 27.44, 27.41, 25.10, 25.01, 22.91, 14.35;  $^{19}\text{F}$  NMR (376 MHz,  $\text{CDCl}_3$ )  $\delta$  -121.67 (m, 1F);  $^{31}\text{P}$  NMR (162 MHz,  $\text{CDCl}_3$ )  $\delta$  4.95 (1P), -0.19 (1P), -0.21 (1P); MS (MALDI) 1641.81  $[\text{M} + \text{Na}]^+$ ; MALDI-HRMS  $[\text{M} + \text{Na}]^+$  calcd for  $\text{C}_{87}\text{H}_{126}\text{FO}_{21}\text{P}_3\text{Na}$  1641.7886, found 1641.7881.

**1-[2,3,6-*O*-tris(hydroxyl)-4,5-*O*-bis(diphosphoryl)-*myo*-inositol]-4-(*sn*-3,4-*O*-dipalmitoyl-1-fluoro-1-butyl) phosphonic acid (1).** A solution of fully protected phosphoinositide **14a** (50 mg, 0.032 mmol) and Pd/C (10%, 10 mg) in MeOH (10 mL) was stirred at 1 atm  $\text{H}_2$  atmosphere for 6 h, the catalyst was filtered off through a celite pad. The filtrate was concentrated to an almost pure product which was completely dried in vacuum. The residue was subject to ethanethiol (5 mL) and stirred for 1.5 h to afford the benzyl and MOM removed product **1**, which was washed with cold methanol to afford a pure white solid **1** (18 mg, 57%).

$[\alpha]_{20}^{\text{D}} = -5.6$  ( $c$  0.65,  $\text{CHCl}_3/\text{MeOH}$  1:1);  $^1\text{H}$  NMR (400 MHz,  $\text{CDCl}_3/\text{CD}_3\text{OD} = 1:1$ )  $\delta$  5.25 (br, 1H), 4.95 (br, 0.45H), 4.83 (br, 0.55H), 4.43 (q,  $J = 8.8$  Hz, 1H), 4.30 (dd,  $J = 25.6, 2.4$  Hz, 1H), 4.21-4.00 (m, 3H), 3.97 – 3.88 (m, 2H), 3.56 (br, 1H), 2.26 -2.14 (m, 6H), 1.53 (m, 4H), 1.18 (m, 48H), 0.80(t,  $J = 6.8$  Hz, 6H);  $^{13}\text{C}$  NMR (101 MHz,  $\text{CDCl}_3/\text{CD}_3\text{OD} = 1:1$ )  $\delta$  175.28, 174.15, 173.96, 34.47, 34.34, 34.21, 32.05, 29.84, 29.79, 29.68, 29.54, 29.49, 29.34, 29.28, 29.21, 25.04, 24.50, 24.96, 22.79, 14.05, 14.03;  $^{19}\text{F}$  NMR (376 MHz,  $\text{CDCl}_3/\text{CD}_3\text{OD} = 1:1$ )  $\delta$  -207.26, -208.20, -210.27, -210.93;  $^{31}\text{P}$  NMR (162 MHz,  $\text{CDCl}_3/\text{CD}_3\text{OD} = 1:1$ )  $\delta$  17.09 (1P), 1.69 (1P), 1.43 (1P); MS (MALDI) 985.52  $[\text{M} - \text{H}]^+$ ; MALDI-HRMS  $[\text{M} + \text{Na}]^+$

calcd for C<sub>42</sub>H<sub>82</sub>FO<sub>18</sub>P<sub>3</sub>Na 1009.4596, found 1009.4464.

**1-[2,3,6-*O*-tris(hydroxyl)-4,5-*O*-bis(diphosphoryl)-*myo*-inositol]-4-(*sn*-3,4-*O*-dioctanoyl-1-fluoro-1-butyl) phosphonic acid (2).** Was obtained from **14b** in 53% yield analogously as described for compound **1**.

$[\alpha]_{20}^D = -6.4$  (*c* 1.10, CHCl<sub>3</sub>/MeOH 1:1); <sup>1</sup>H NMR(400 MHz, CDCl<sub>3</sub>/CD<sub>3</sub>OD = 1:1)  $\delta$  5.27 (br,1H), 4.69 (br,1H), 4.41- 4.00 (m, 5H), 3.93 (m, 2H), 3.59 (m, 1H), 2.24 (m, 6H), 1.52 (brs, 4H), 1.20 (brs, 16H), 0.80 (t, *J* = 6.8 Hz, 6H); <sup>13</sup>C NMR (101 MHz, CDCl<sub>3</sub>/CD<sub>3</sub>OD = 1:1)  $\delta$  174.09, 174.06, 34.32, 34.20, 34.06, 34.02, 31.77, 31.75, 29.68, 29.70, 29.11, 29.04, 29.02, 24.97, 24.92, 24.88, 22.63, 13.74.; <sup>19</sup>F NMR (376 MHz, CDCl<sub>3</sub>/CD<sub>3</sub>OD = 1:1)  $\delta$  -206.82, -207.89, -209.89, -210.56; <sup>31</sup>P NMR (162 MHz, CDCl<sub>3</sub>/CD<sub>3</sub>OD = 1:1)  $\delta$  16.50 (1P), 1.64 (1P), 1.05 (1P); MS (MALDI) 785.22 [M + Na]<sup>+</sup>; MALDI-HRMS [M + Na]<sup>+</sup> calcd for C<sub>26</sub>H<sub>50</sub>FO<sub>18</sub>P<sub>3</sub>Na 785.2092, found 785.2086.

**1-[2,3,6-*O*-tris(hydroxyl)-4,5-*O*-bis(diphosphoryl)-*myo*-inositol]-4-(*sn*-3,4-*O*-dipalmitoyl-1-fluoro-1-buten-1-yl) phosphonic acid (3).** To completely dried compound **14a** (40 mg, 0.0255 mmol) in a 1.5 mL reaction vial under argon atmosphere was added TMSBr (1 mL) and TMSI (0.2 mL) at room temperature. The reaction mixture was stirred at room temperature for 1.5 h. The mixture was concentrated under vacuum to remove excess TMSBr, TMSI, methyl and benzyl bromide or iodide product. The colored residue was shown no MOM and benzyl groups existing through <sup>1</sup>H NMR. The residue was treated with methanol (1 mL) and stirred for 1 h, white precipitate was produced. The solvent was removed under vacuum, The colored solid was dried under vacuum and washed with a 0.5 mL of cold methanol to afford a white solid **3** (22 mg, 87.5%) as a pure product.

$[\alpha]_{20}^D = 5.0$  (*c* 0.2, CHCl<sub>3</sub>/MeOH 1:1); <sup>1</sup>H NMR(400 MHz, CDCl<sub>3</sub>/CD<sub>3</sub>OD = 1:1)  $\delta$  5.70 (br,

2H), 4.37 (d,  $J = 9.2$  Hz, 1H), 4.18 (d,  $J = 11.6$  Hz, 1H), 4.04 (m, 4H), 3.89 (s, 1H), 5.52 (d,  $J = 8.8$  Hz, 1H), 2.20 (t,  $J = 7.2$  Hz, 4H), 1.48 (t,  $J = 6.8$  Hz, 4H), 1.20 (br, 48H), 0.75 (t,  $J = 6.8$  Hz, 6H);  $^{13}\text{C}$  NMR (101 MHz,  $\text{CDCl}_3/\text{CD}_3\text{OD} = 1:1$ )  $\square$  175.31, 174.02, 173.41, 117.00, 79.98, 79.69, 78.72, 78.43, 78.00, 71.32, 70.30, 65.67, 63.85, 34.22, 34.13, 34.11, 32.02, 29.79, 29.75, 29.65, 29.61, 29.56, 29.51, 29.45, 29.44, 29.40, 29.31, 29.21, 29.18, 25.00, 24.94, 22.74, 18.86, 13.91;  $^{19}\text{F}$  NMR (376 MHz,  $\text{CDCl}_3/\text{CD}_3\text{OD} = 1:1$ )  $\square$  -121.25 (m, 1F);  $^{31}\text{P}$  NMR (162 MHz,  $\text{CDCl}_3/\text{CD}_3\text{OD} = 1:1$ )  $\square$  2.86, 2.21, 1.60, 1.21; MS (MALDI) 1007.44  $[\text{M} + \text{Na}]^+$ ; MALDI-HRMS  $[\text{M} + \text{Na}]^+$  calcd for  $\text{C}_{42}\text{H}_{80}\text{FO}_{18}\text{P}_3\text{Na}$  1007.4439, found 1007.4433.

**1-[2,3,6-*O*-tris(hydroxyl)-4,5-*O*-bis(diphosphoryl)-*myo*-inositol]-4-(*sn*-3,4-*O*-dioctanoyl-1-fluoro-1-buten-1-yl) phosphonic acid (4).** Was obtained from **14b** in 91% yield analogously as described for compound **3**.  $[\alpha]_{20}^{\text{D}} = 7.3$  ( $c$  0.3,  $\text{CHCl}_3/\text{MeOH}$  1:1);  $^1\text{H}$  NMR(400 MHz,  $\text{CDCl}_3/\text{CD}_3\text{OD} = 1:1$ )  $\square$  5.72 (br, 2H), 4.37 (q,  $J = 8.8$  Hz, 1H), 4.18 (d,  $J = 11.6$  Hz, 1H), 4.03 (m, 4H), 3.90 (d,  $J = 8.4$  Hz, 1H), 3.53 (d,  $J = 8.4$  Hz, 1H), 2.21 (t,  $J = 7.2$  Hz, 4H), 1.48 (t,  $J = 6.8$  Hz, 4H), 1.17 (br, 16H), 0.75 (t,  $J = 6.8$  Hz, 6H);  $^{13}\text{C}$  NMR (101 MHz,  $\text{CDCl}_3/\text{CD}_3\text{OD} = 1:1$ )  $\square$  174.51, 173.28, 173.22, 172.61, 117.00, 79.16, 78.90, 77.89, 70.52, 69.50, 64.98, 63.05, 33.37, 33.30, 33.26, 30.95, 28.91, 28.30, 28.28, 28.19, 24.19, 24.09, 21.83, 13.02;  $^{19}\text{F}$  NMR (376 MHz,  $\text{CDCl}_3/\text{CD}_3\text{OD} = 1:1$ )  $\square$  -121.30 (m, 1F);  $^{31}\text{P}$  NMR (162 MHz,  $\text{CDCl}_3/\text{CD}_3\text{OD} = 1:1$ )  $\square$  2.80 (0.5P), 2.15 (0.5P); 1.58 (1P), 1.17 (1P); MS (MALDI) 783.21  $[\text{M} + \text{Na}]^+$ ; MALDI-HRMS  $[\text{M} + \text{Na}]^+$  calcd for  $\text{C}_{26}\text{H}_{48}\text{FO}_{18}\text{P}_3\text{Na}$  783.1935, found 783.1927.

**1-[2,3,6-*O*-tris(hydroxyl)-4,5-*O*-bis(diphosphoryl)-*myo*-inositol]-4-(*sn*-3,4-*O*-dioleoyl-1-fluoro-1-buten-1-yl) phosphonic acid (5).** Was obtained from **14c** in 96% yield analogously

as described for compound **3**.

$[\alpha]_{20}^D = 2.3$  (*c* 1.02, CHCl<sub>3</sub>/MeOH 1:1); <sup>1</sup>H NMR(400 MHz, CD<sub>3</sub>OD/CDCl<sub>3</sub> = 5:1)  $\delta$  5.82 - 5.75 (br, 2H), 5.24 (t, *J* = 4.8 Hz, 4H), 4.72 – 4.54 (m, 1 H), 4.42 (s, 1H), 4.25 (d, *J* = 10.8 Hz, 1H), 4.07 – 4.01 (m, 4H), 3.57 (s, OH, 3H), 3.48 (s, 1H), 2.22 (2t, *J* = 7.6 Hz, 4H), 1.93 (d, *J* = 5.6 Hz, 4H), 1.78 -1.70 (m, 2H), 1.64 - 1.56 (m, 2H), 1.52 (m, 4H), 1.22 (br, 40H), 0.80 (t, *J* = 6.8 Hz, 6H); <sup>13</sup>C NMR (101 MHz, CD<sub>3</sub>OD/CDCl<sub>3</sub> = 5:1)  $\delta$  174.97, 173.73, 173.14, 173.00, 129.83, 129.79, 129.66, 129.58, 117.00, 80.12, 79.85, 79.48, 79.32, 79.03, 78.78, 77.16, 71.91, 71.54, 70.29, 69.80, 66.57, 65.76, 65.13, 63.82, 63.08, 40.76, 40.72, 40.69, 39.94, 39.86, 39.82, 34.00, 33.89, 33.84, 31.94, 31.89, 29.76, 29.74, 29.66, 29.54, 29.51, 29.46, 29.42, 29.37, 29.34, 29.28, 29.26, 29.14, 29.11, 29.08, 29.04, 28.98, 28.84, 28.81, 28.70, 28.59, 27.12, 27.09, 27.04, 24.91, 24.87, 24.83, 22.64, 13.59, 13.56; <sup>19</sup>F NMR (376 MHz, CDCl<sub>3</sub>/CD<sub>3</sub>OD = 1:5)  $\delta$  -120.94, -123.13, -125.31, -126.60; <sup>31</sup>P NMR (162 MHz, CDCl<sub>3</sub>/CD<sub>3</sub>OD = 1:5)  $\delta$  2.21 (br); MS (MALDI) 1059.56 [M + Na]<sup>+</sup>; MALDI-HRMS [M + Na]<sup>+</sup> calcd for C<sub>46</sub>H<sub>84</sub>FO<sub>18</sub>P<sub>3</sub>Na 1059.4752, found 1059.4747.

### General information for NMR spectra

There is a racemic phosphorus stereocenter in compounds **12-14** and **1-5**. In addition, compounds **12-14** and **3-5** are approximately equimolar mixtures of E and Z geometries. None of the individual diastereomers can be separated chromatographically. Similarly, compounds **1** and **2** are inseparable mixtures of the two diastereomers at the C-F center. As a result, there are four stereoisomers present in each compound, which leads to the complexity of their NMR spectra.

## General experimental protocols for biological studies

**Recording of TRPM4 currents.** TRPM4b fused to the C terminus of CFP under a CMV promoter was expressed in ChoK1 cells as previously described.<sup>1</sup> Cells were transfected with Eugene (Roche, ) according to the manufacturer's instructions and recordings were performed 48-72 hours after transfection. Patch clamp recording was performed from CFP-mTRPM4 expressing cells that were identified under epifluorescence. After formation of a gigaohm seal, the patch was excised into zero Ca<sup>2+</sup> containing solution and placed in front of a linear array of micro perfusion pipes from which test solutions were delivered (Warner Instruments, Hamden, CT). For all experiments, the membrane potential was held at -80 mV. All recording were made with an Axopatch 200B amplifier, digitized with a digidata 1322a, acquired with pClamp 8.2 and analyzed with Clampfit 8.2 (Axon Instruments, Union City, CA). Patch pipets (1.5-3 MOhm) were fabricated from borosilicate glass. The pipette solution contained (in mM): NaCl, 145; HEPES, 10; CaCl<sub>2</sub>, 2 (pH 7.4 with NaOH). Bath (cytosolic) solutions were as follows. Zero Ca<sup>2+</sup> solution was (in mM): NaCl, 145; HEPES, 10; HEDTA, 2 (pH 7.4 with NaOH). 100 mM Ca<sup>2+</sup> solutions contained (in mM) NaCl, 145; HEPES, 10; 0.1 mM CaCl<sub>2</sub> (pH 7.4 with NaOH). Dioctanoyl-PtdIns(4,5)P<sub>2</sub> was obtained from Echelon Biosciences, Inc. (Salt Lake City, UT).

<sup>1</sup>Zhang, Z.; Okawa, H.; Wang, Y.; Liman, E. R. *J. Biol. Chem.* **2005**, *280*, 39185-39192.

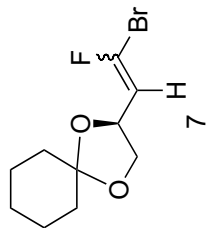

<sup>1</sup>H NMR (400 MHz, CDCl<sub>3</sub>)

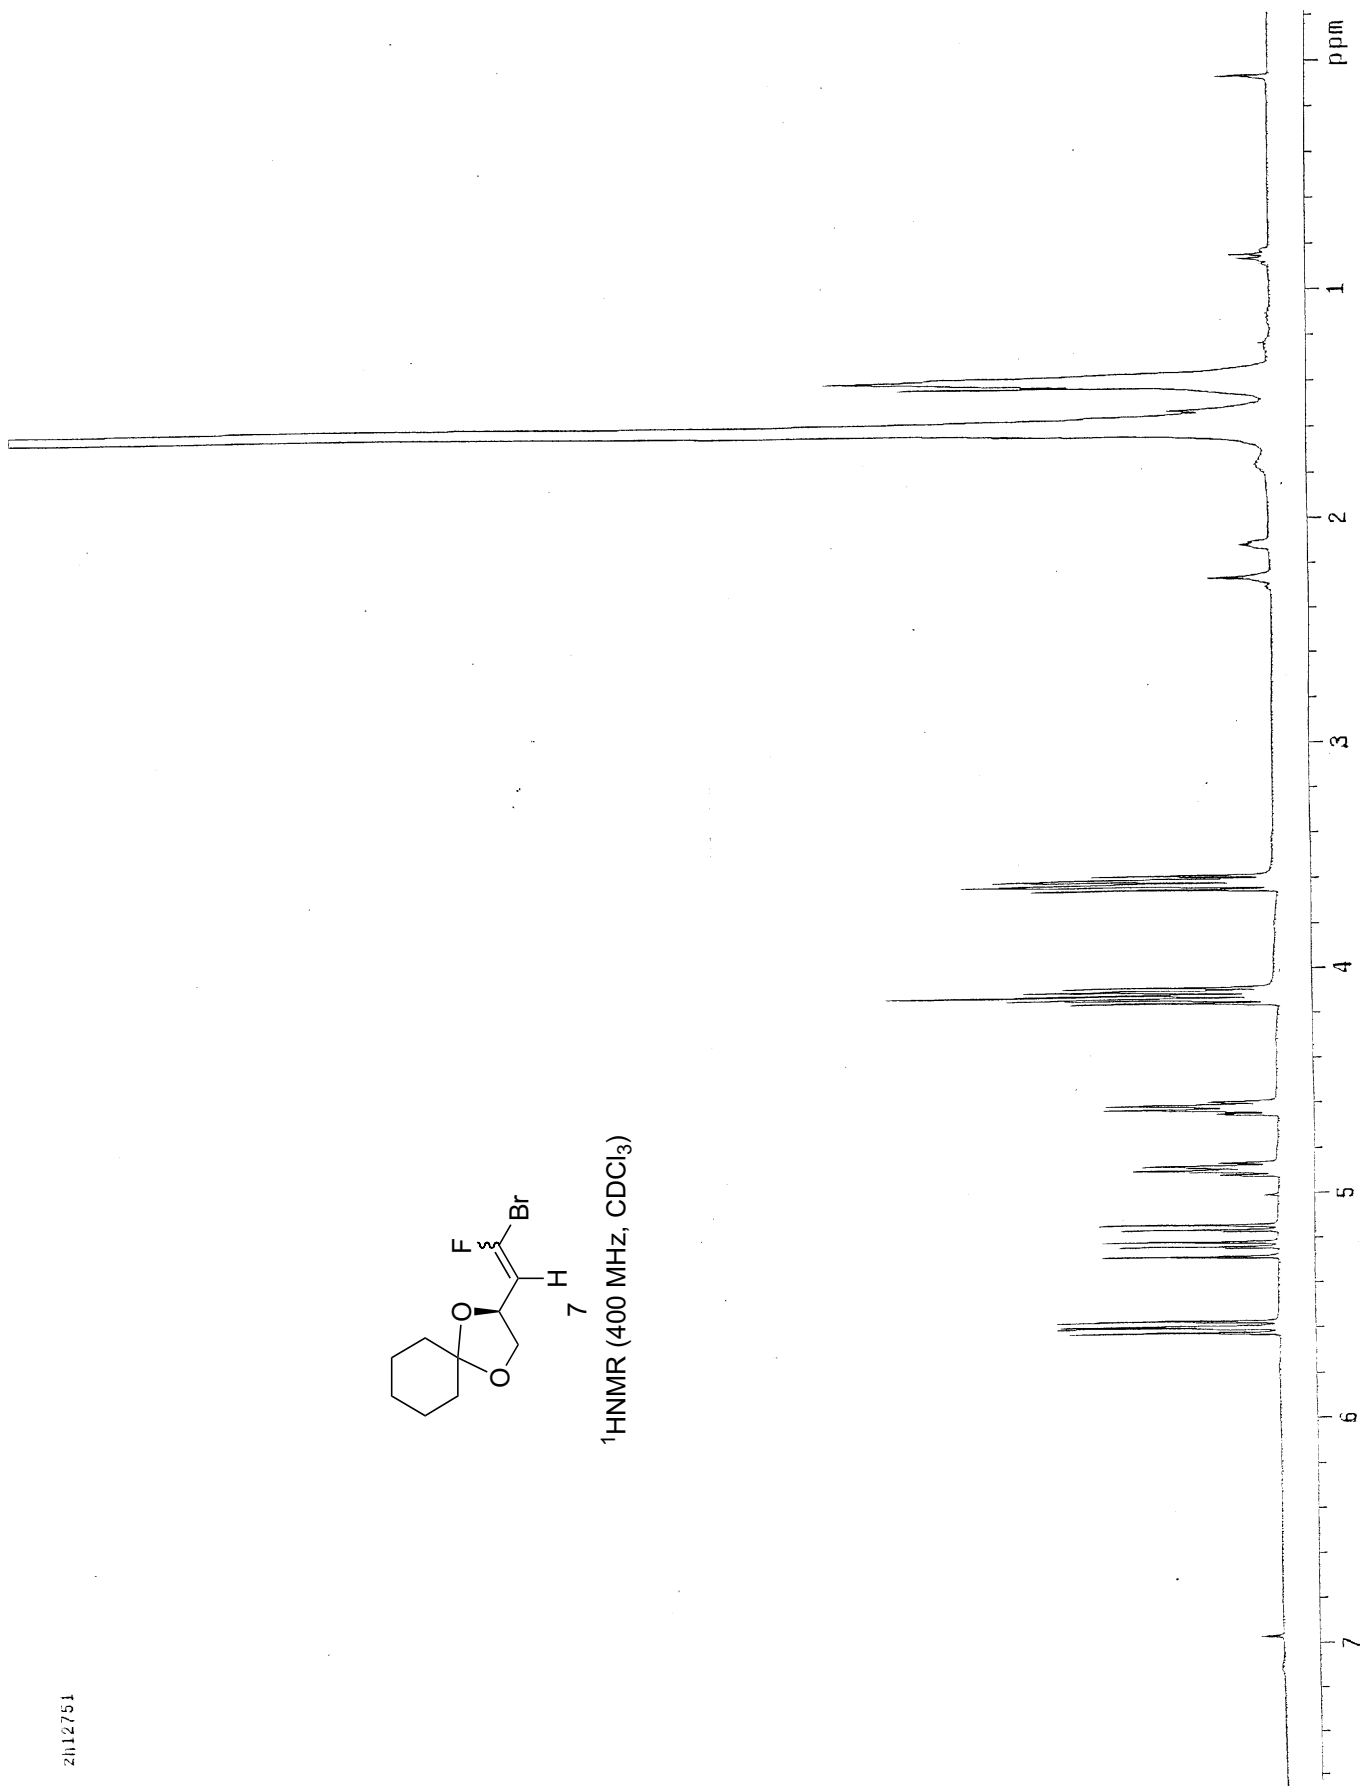

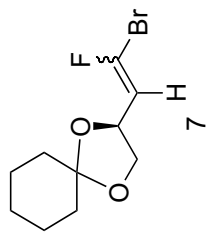

<sup>19</sup>F NMR (376 MHz, CDCl<sub>3</sub>)

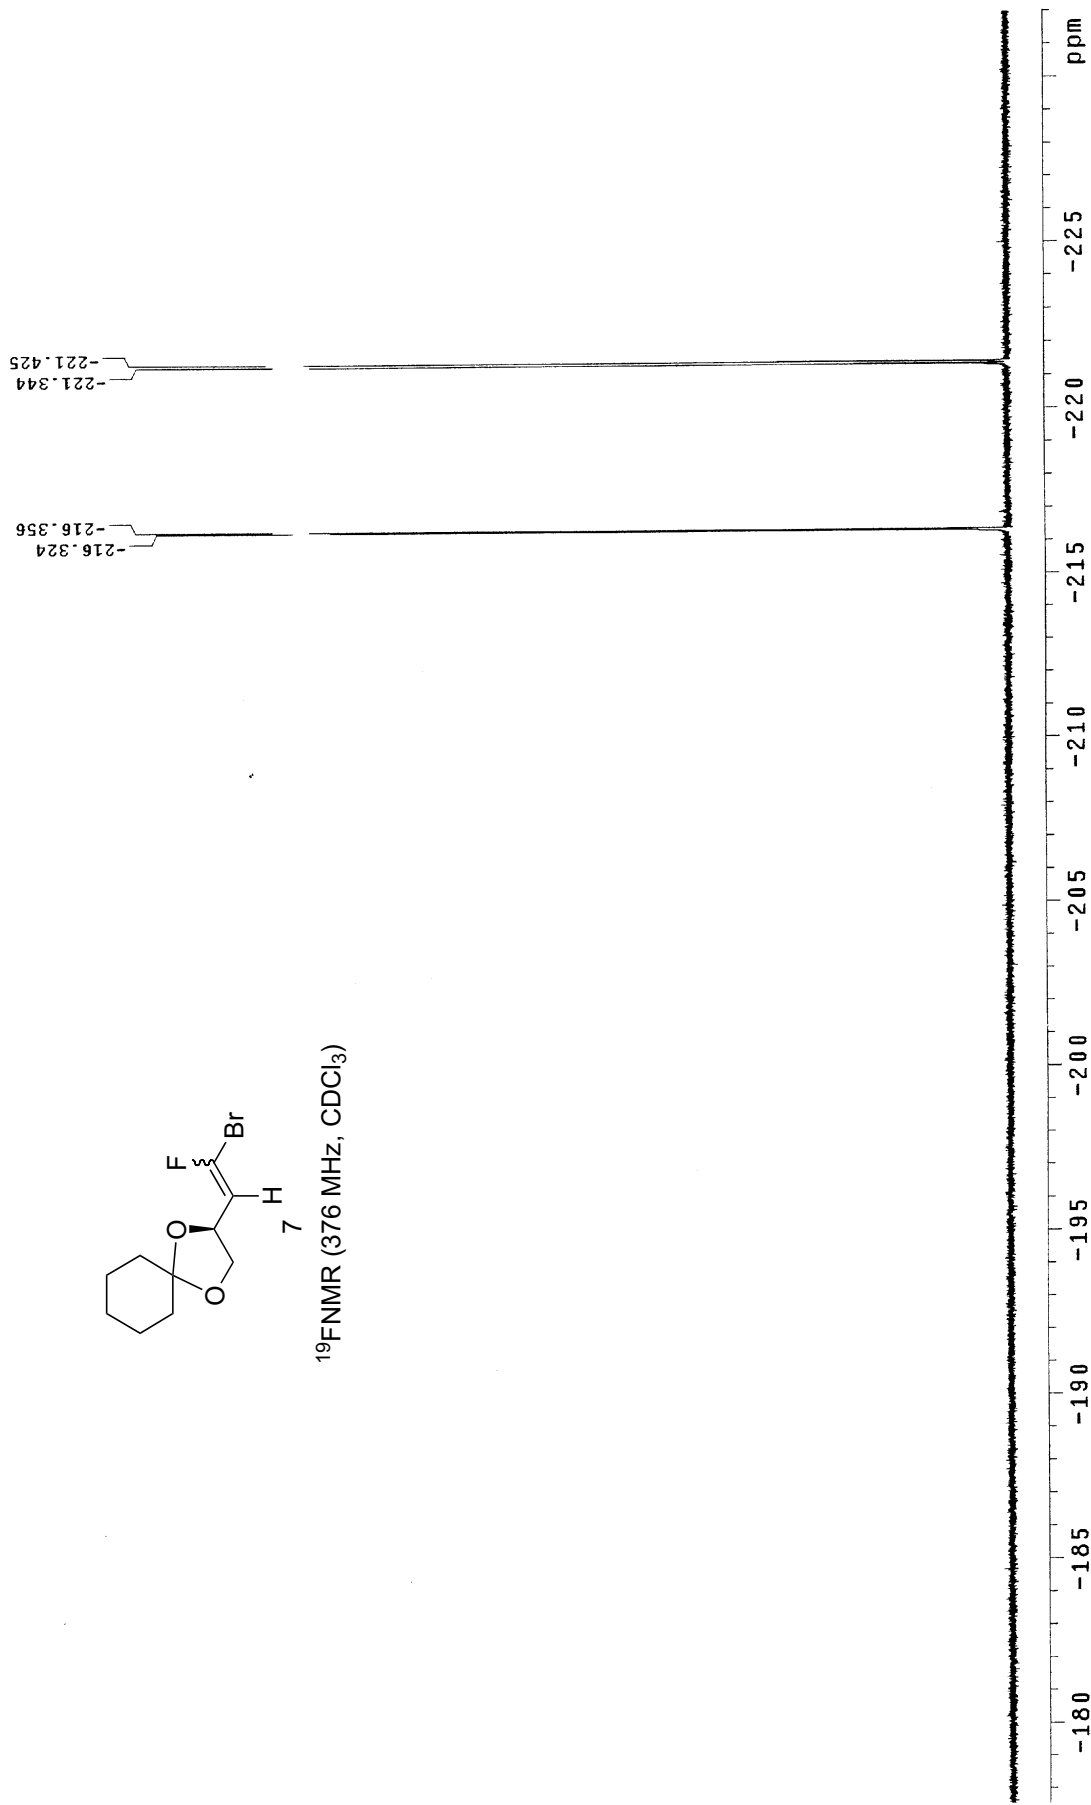

Zh10211  
CDC13

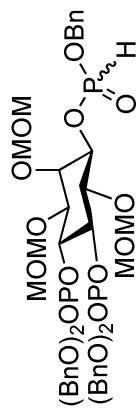

11

<sup>1</sup>H NMR (400 MHz, CDCl<sub>3</sub>)

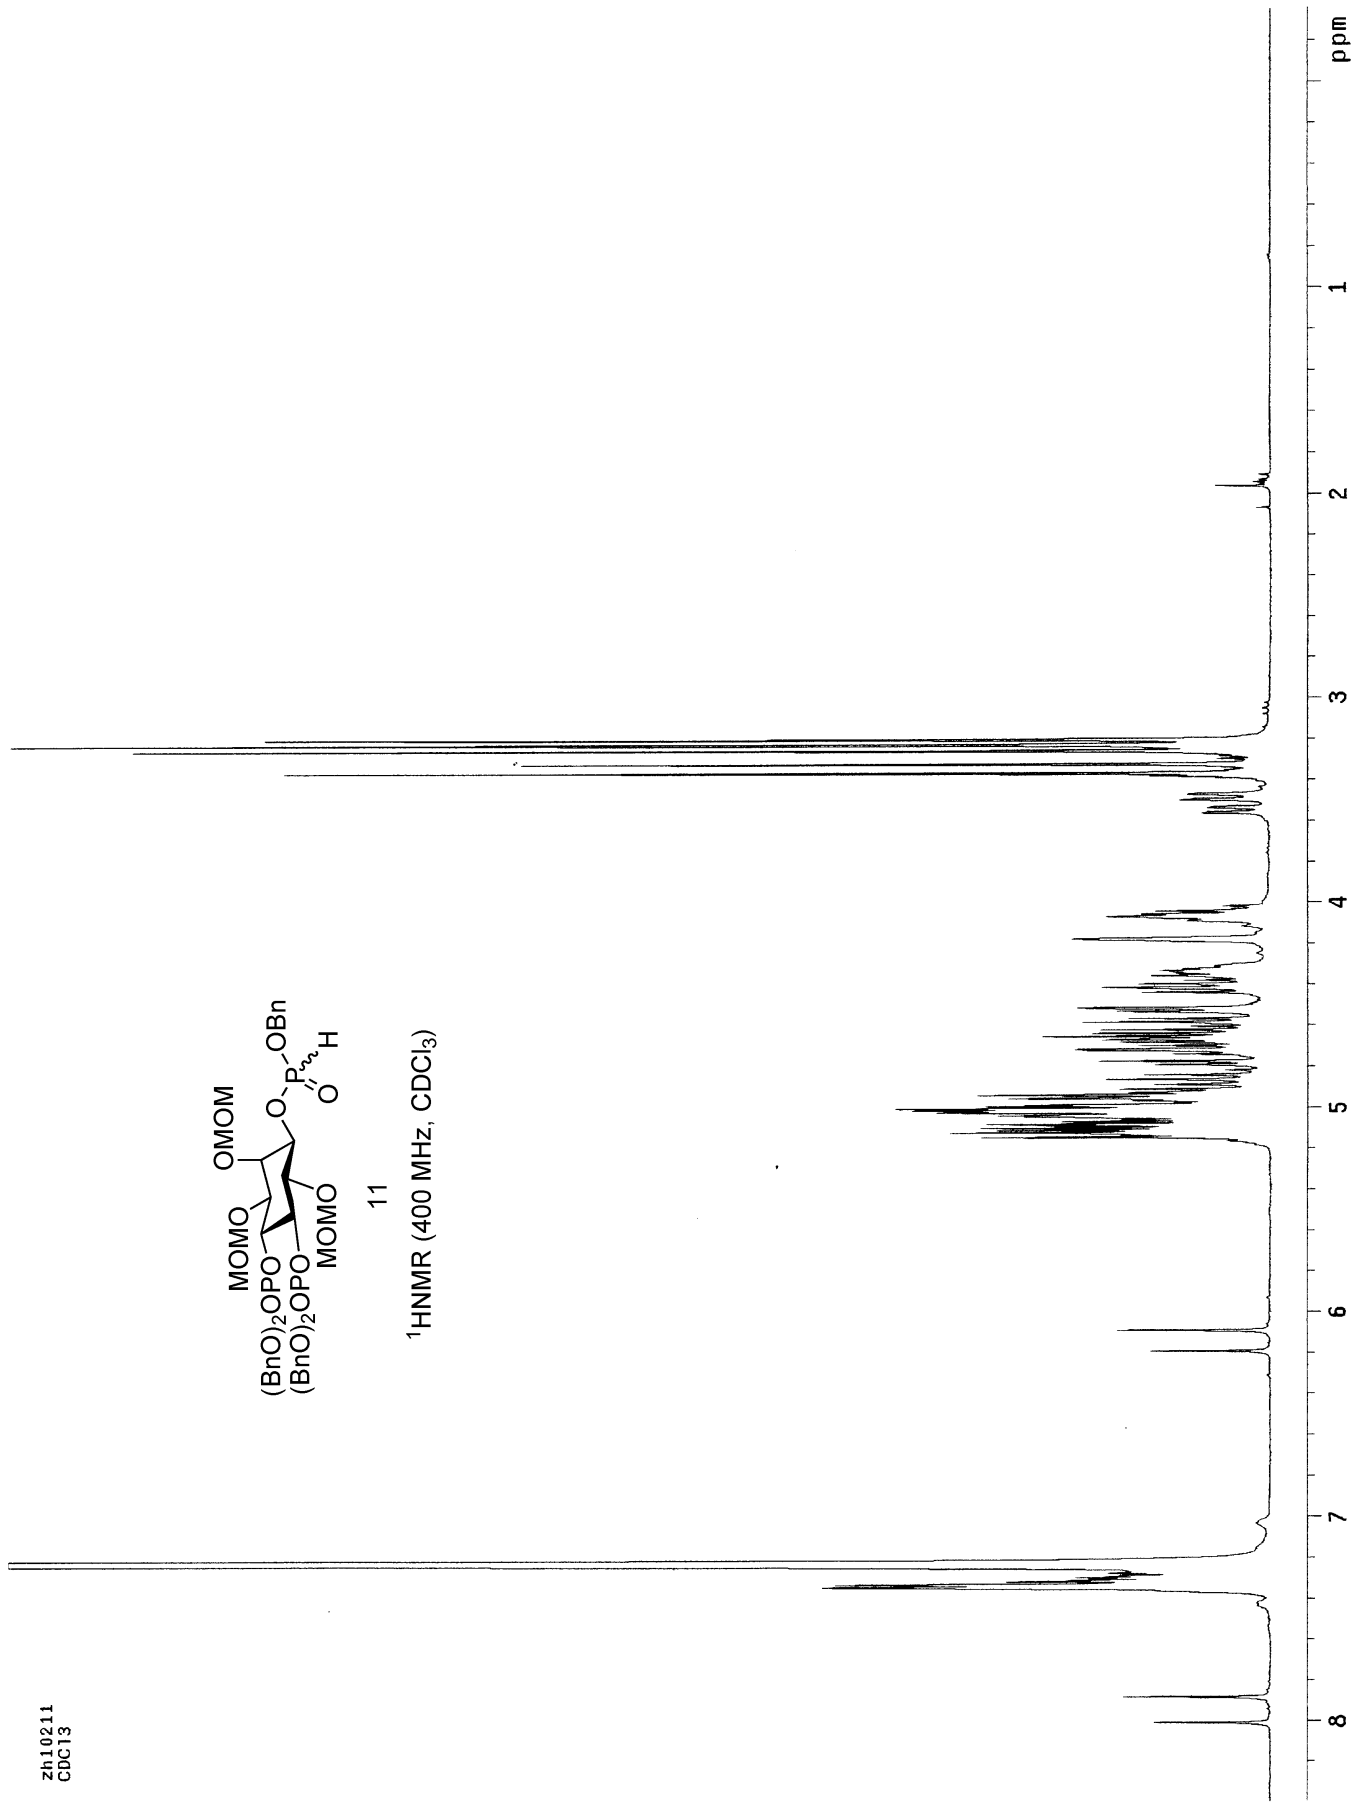



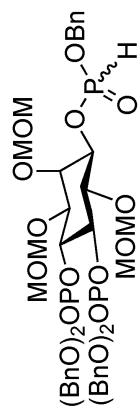

11

<sup>31</sup>P NMR (162 MHz, CDCl<sub>3</sub>)

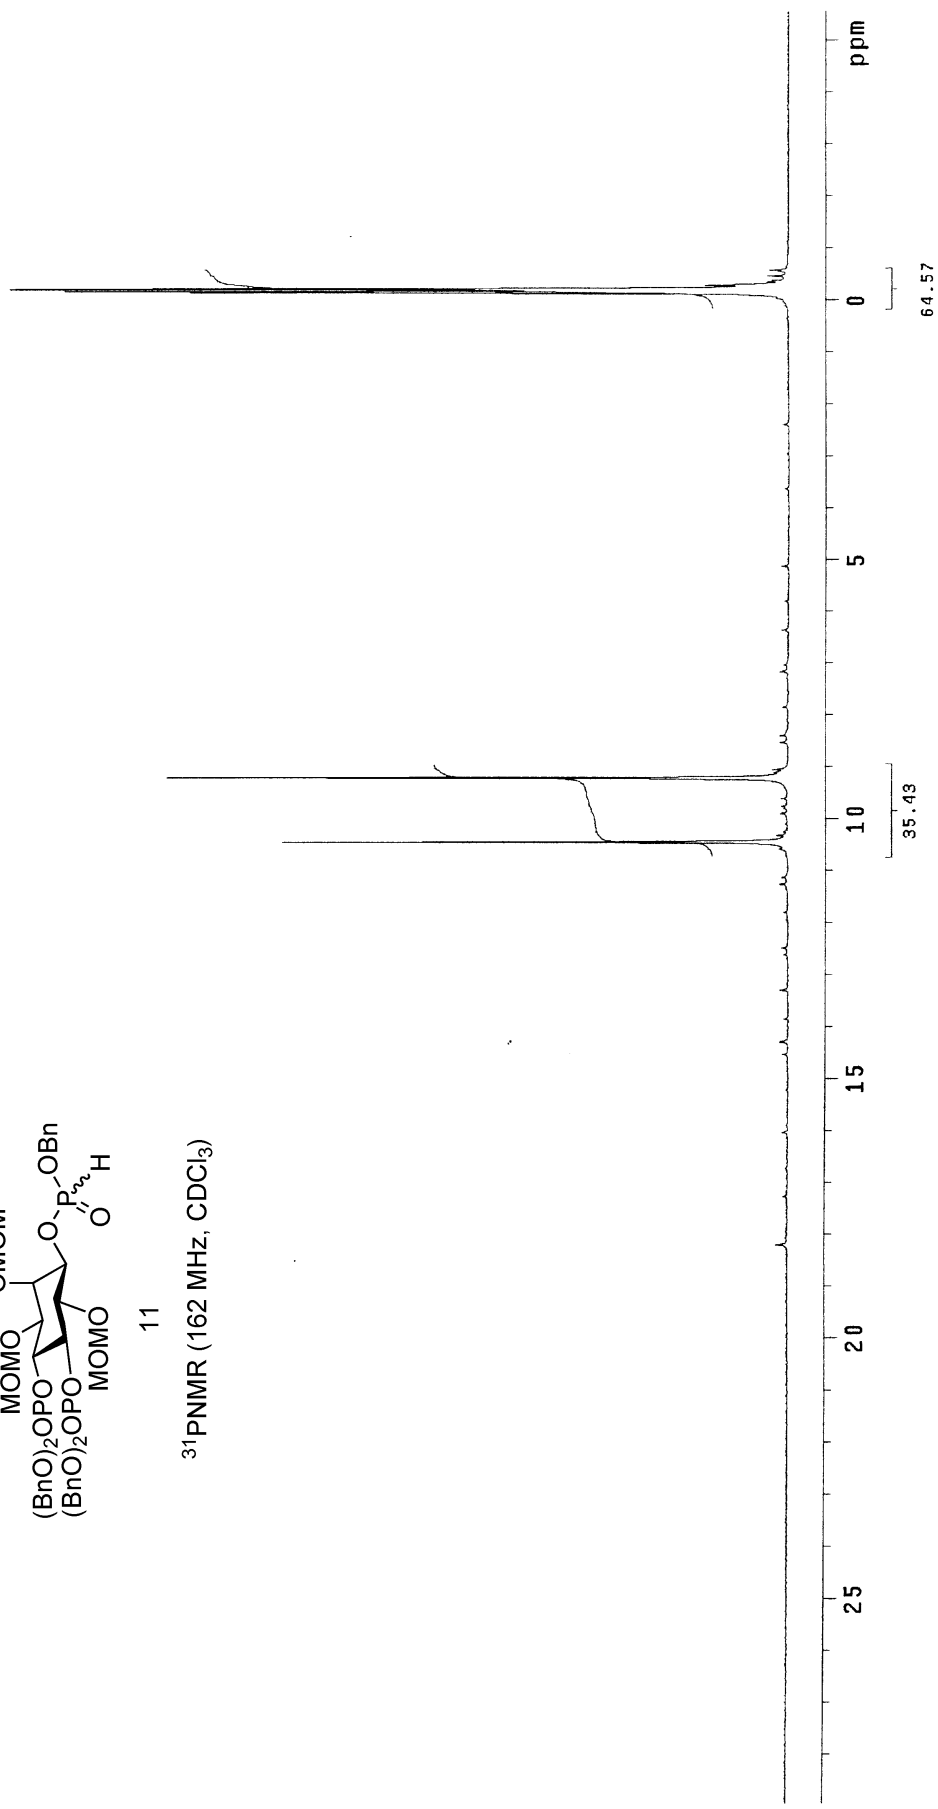

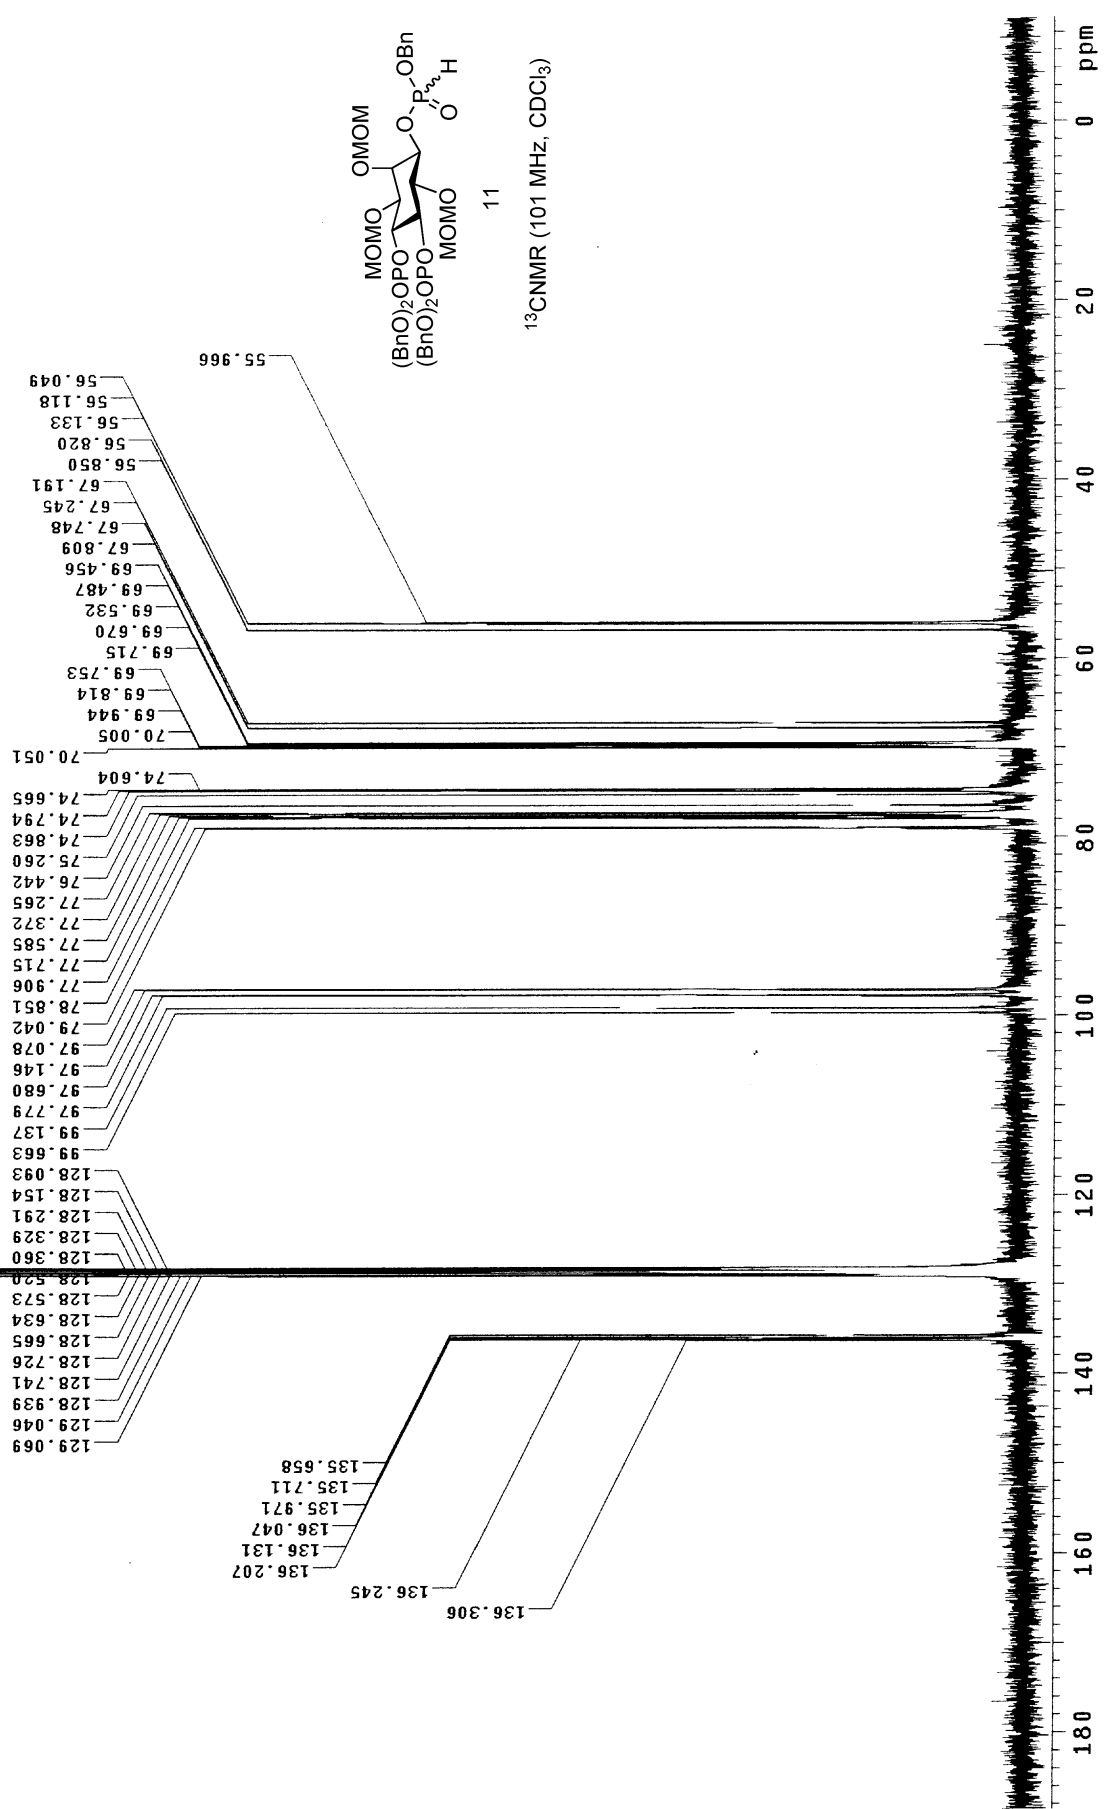



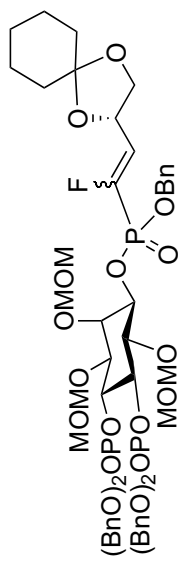

12

 $^{19}\text{F}$ NMR (376 MHz,  $\text{CDCl}_3$ )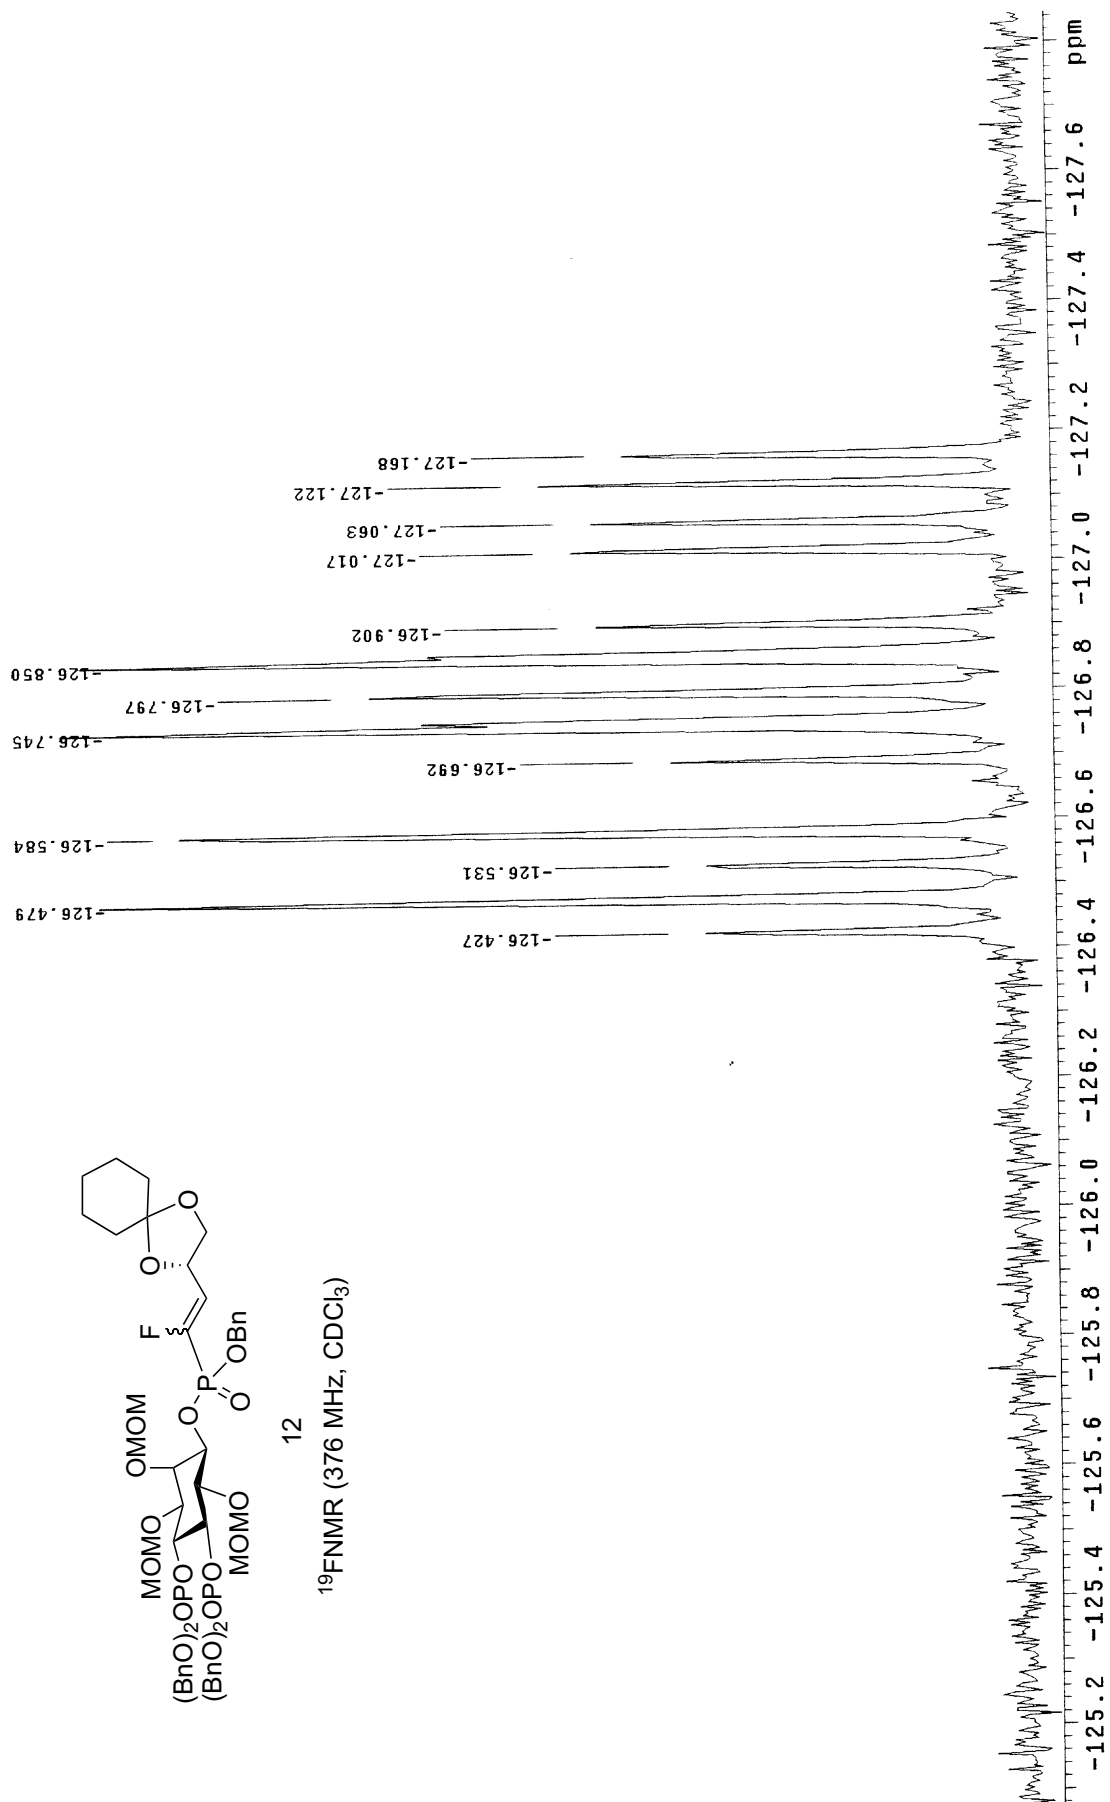

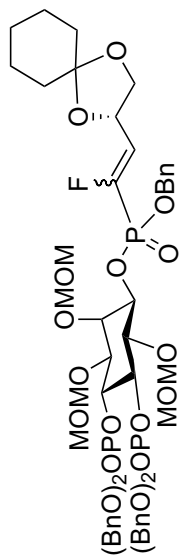

12

<sup>31</sup>P NMR (162 MHz, CDCl<sub>3</sub>)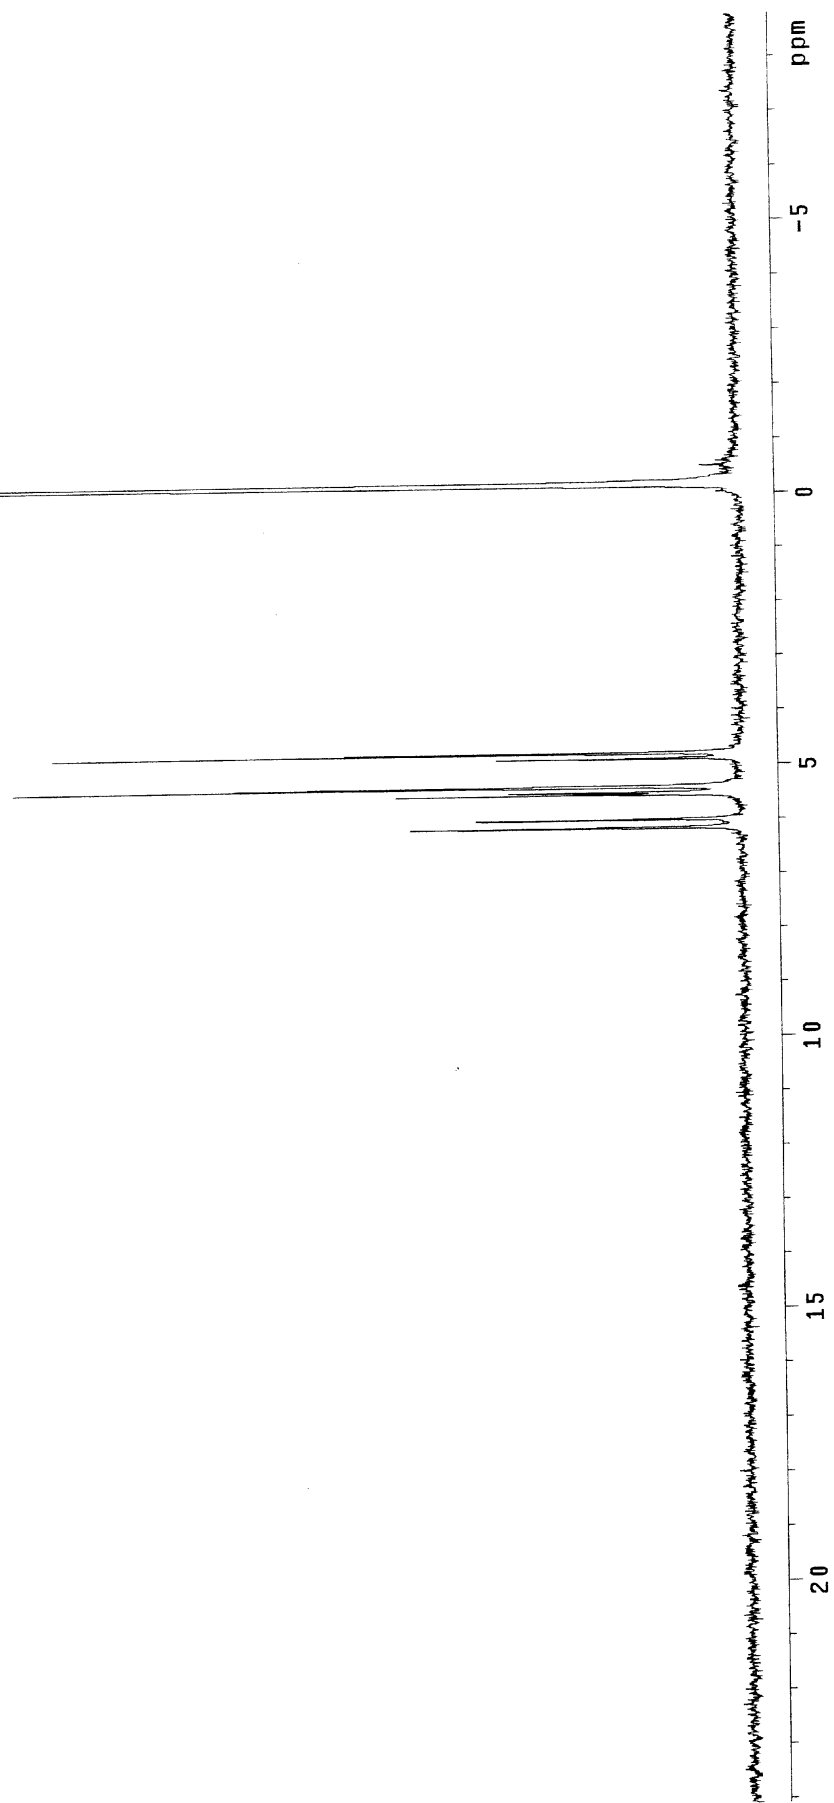

zh12911C

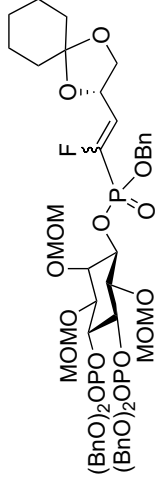

12

<sup>13</sup>CNMR (101 MHz, CDCl<sub>3</sub>)

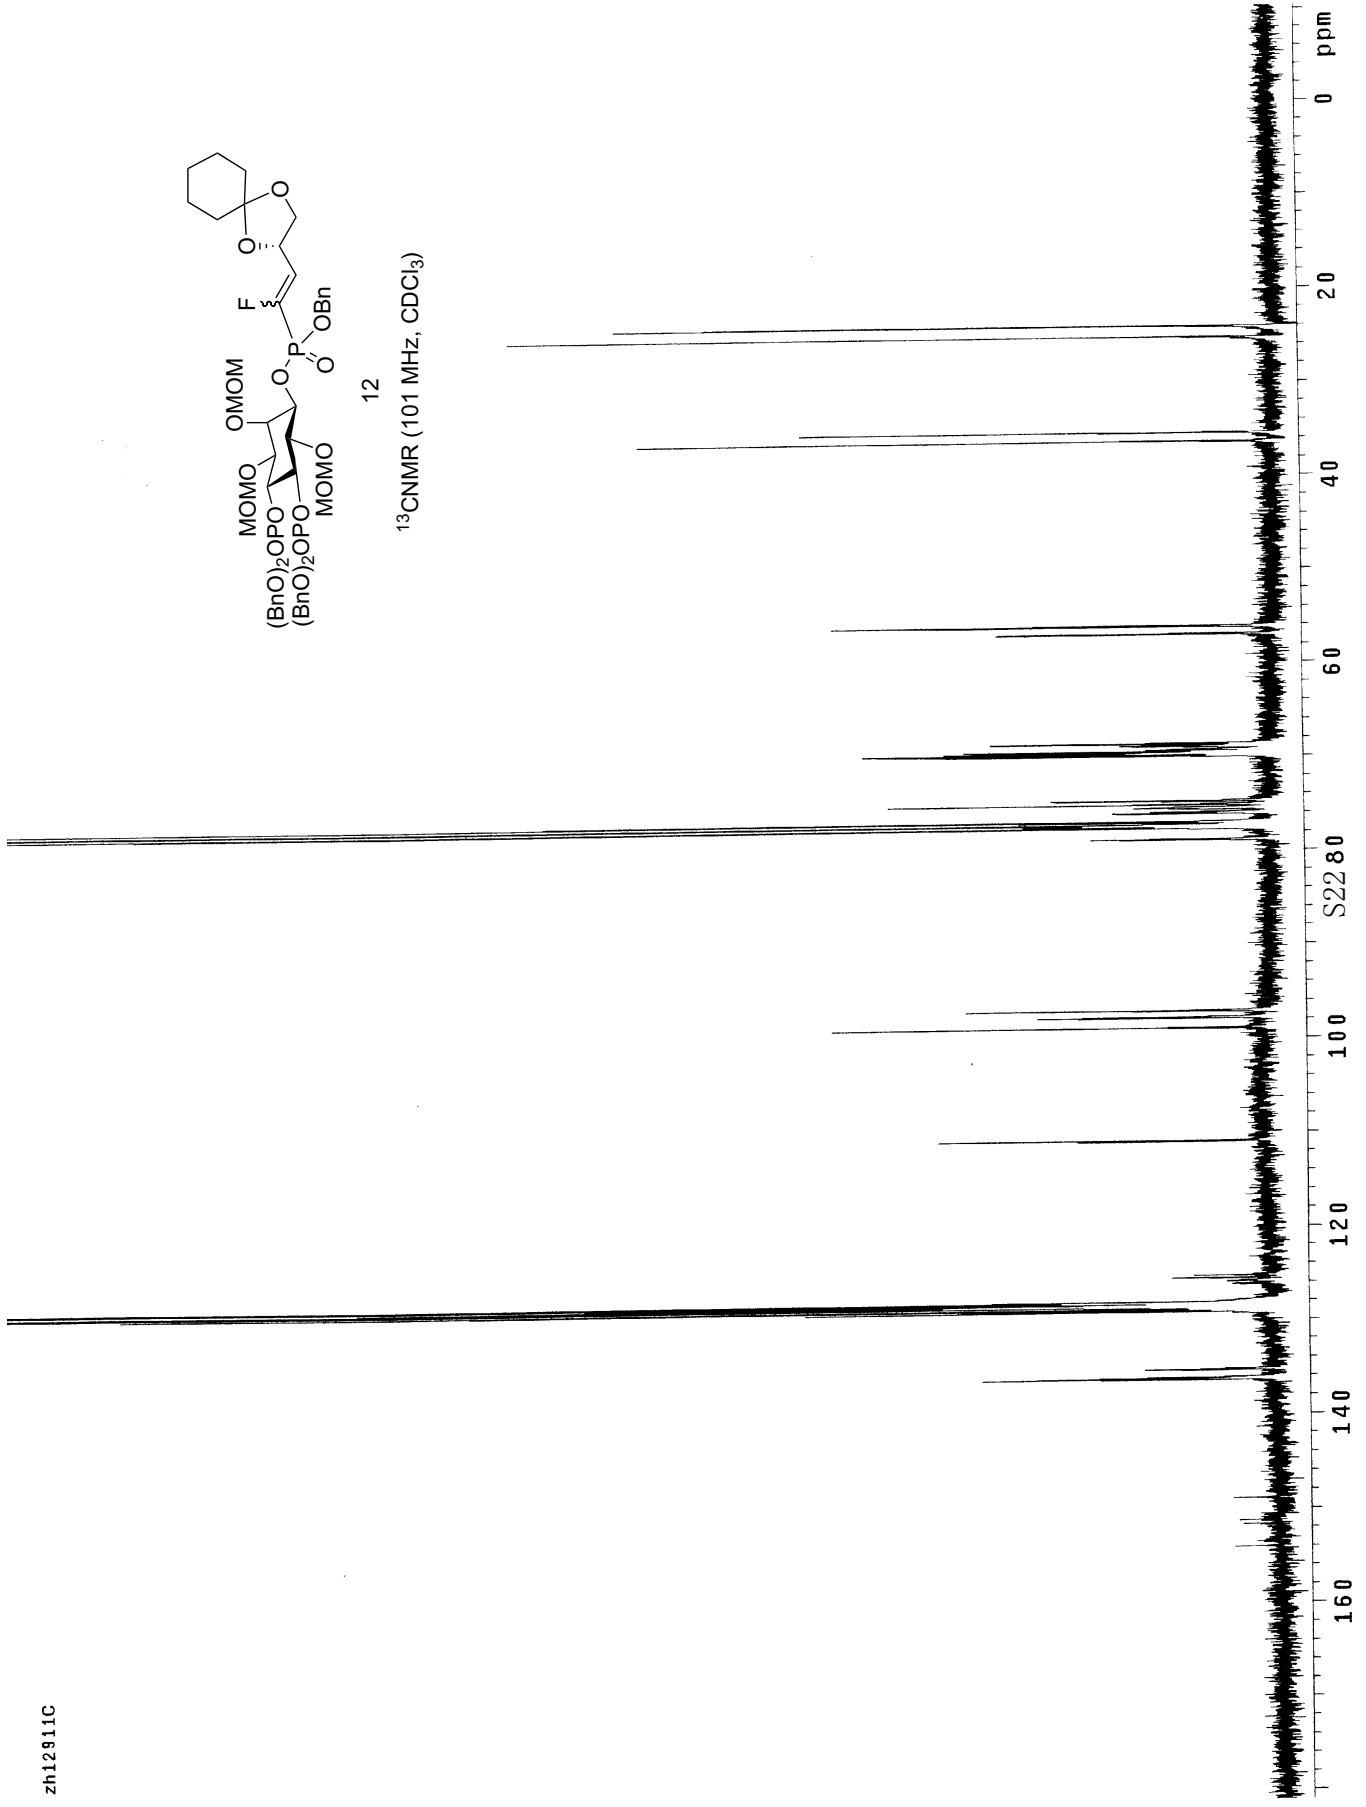

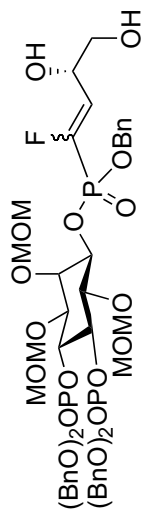

13

<sup>1</sup>H NMR (400 MHz, CDCl<sub>3</sub>)

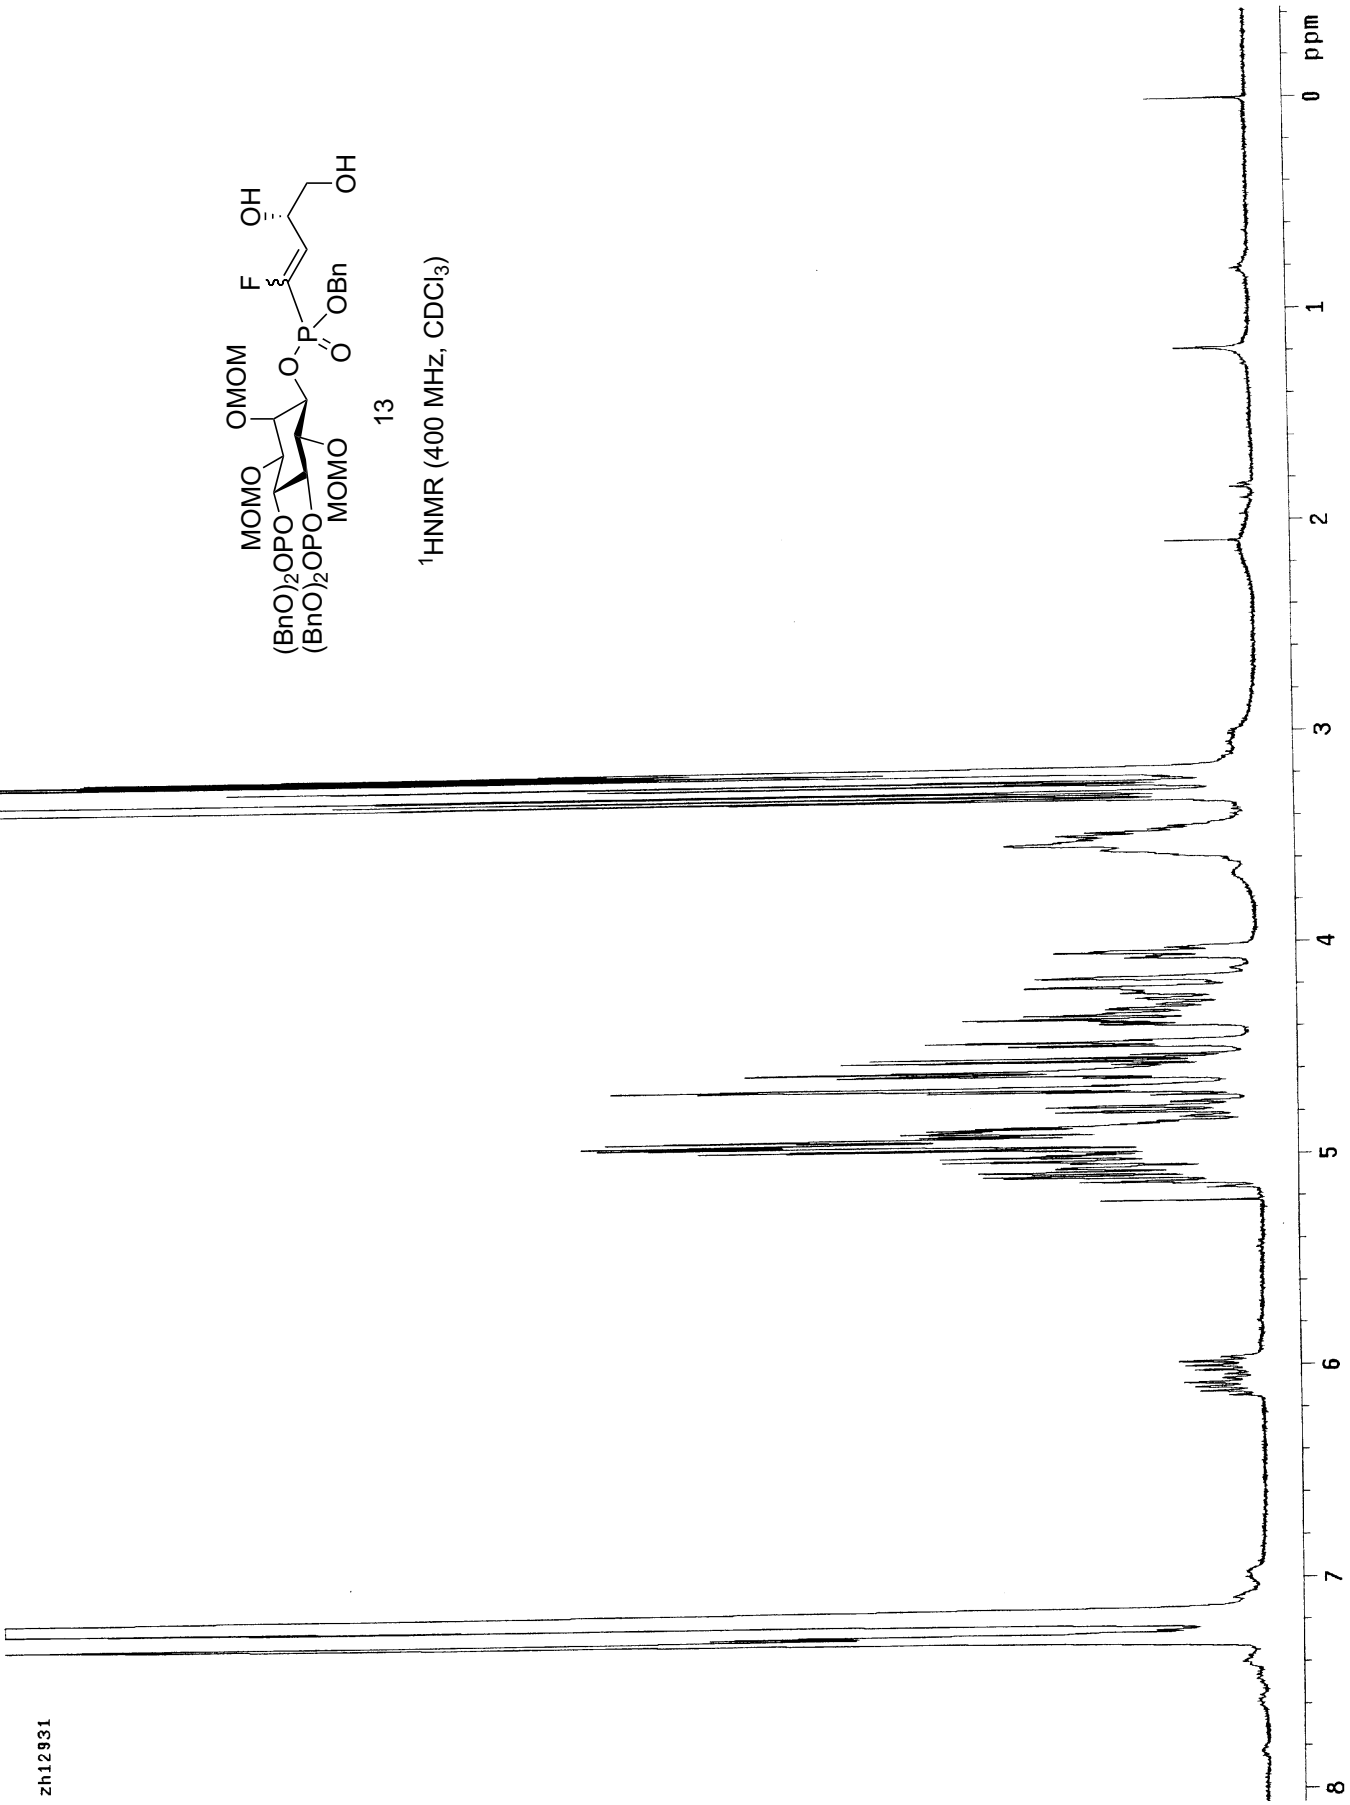

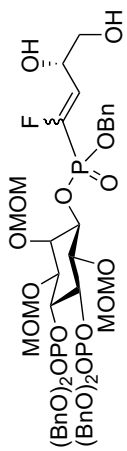

13

<sup>19</sup>F NMR (376 MHz, CDCl<sub>3</sub>)

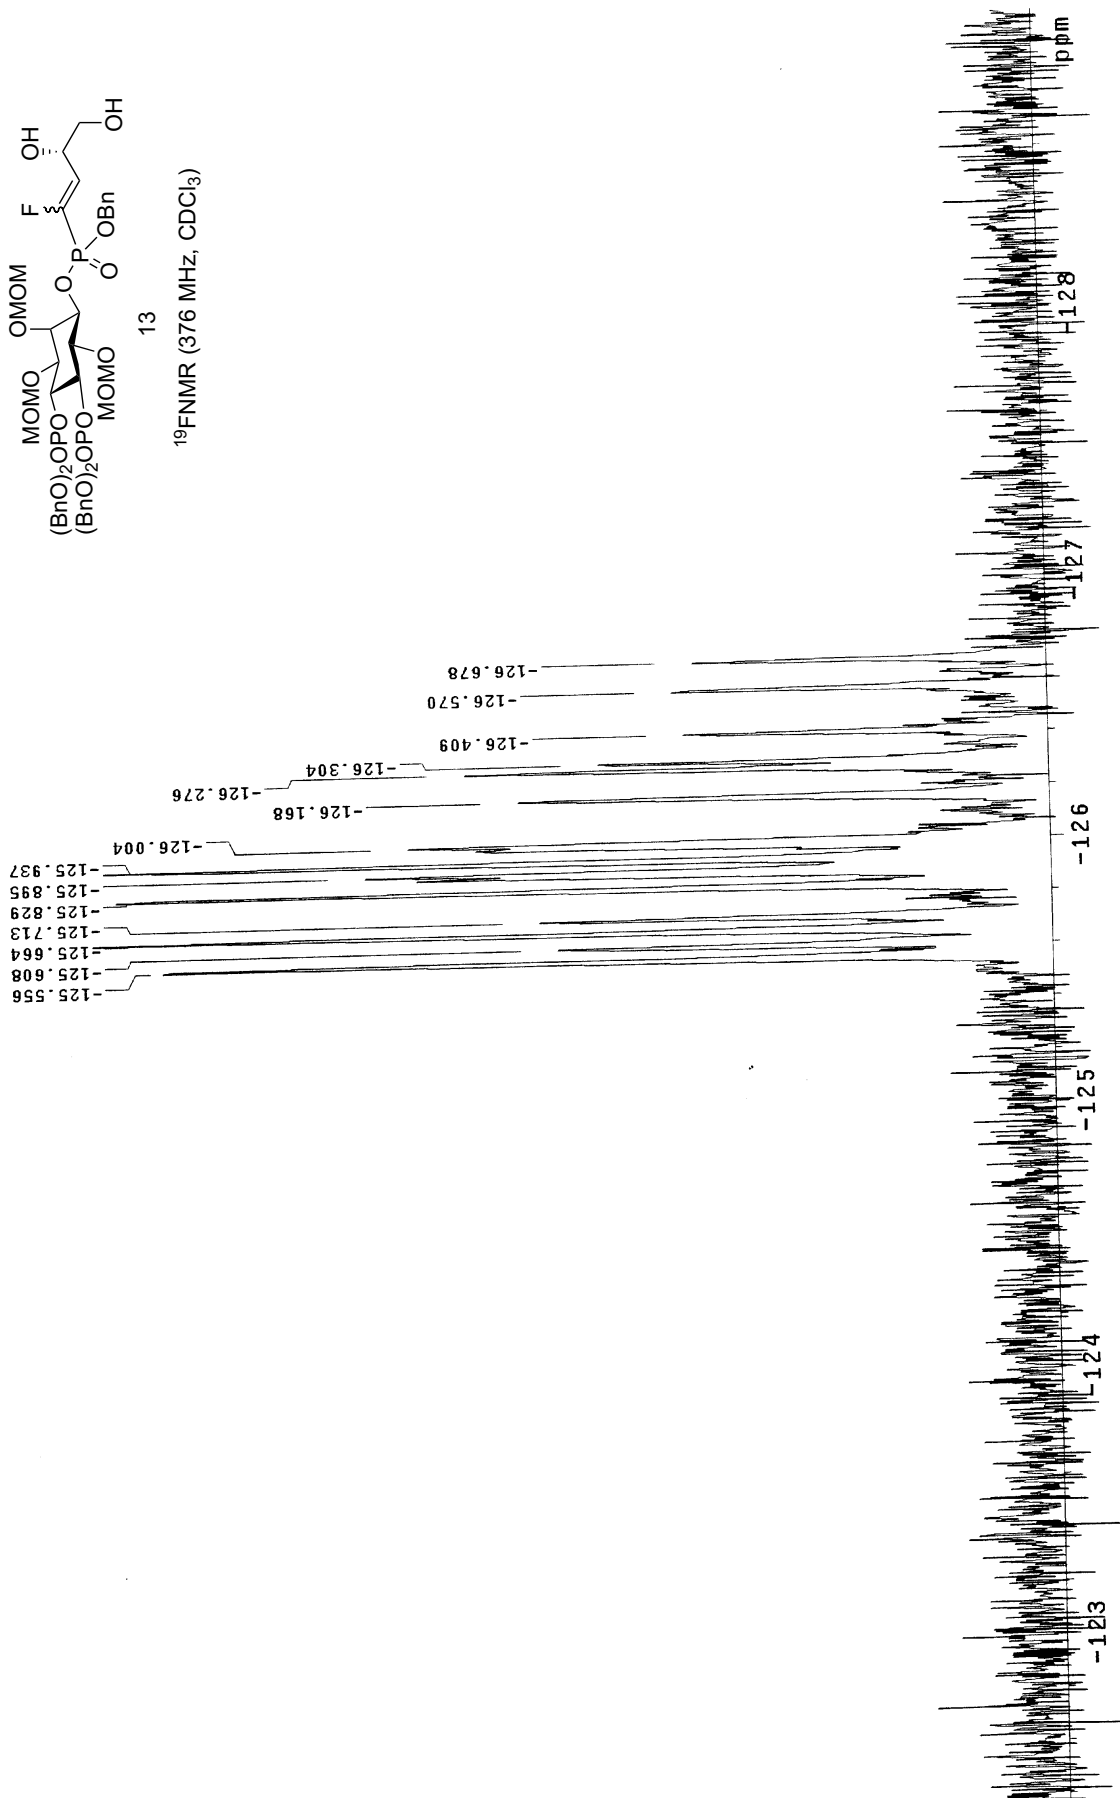



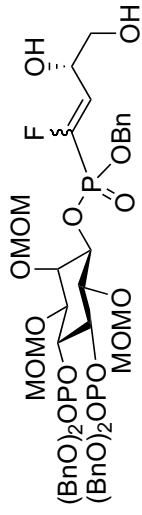

13

<sup>31</sup>P NMR (162 MHz, CDCl<sub>3</sub>)

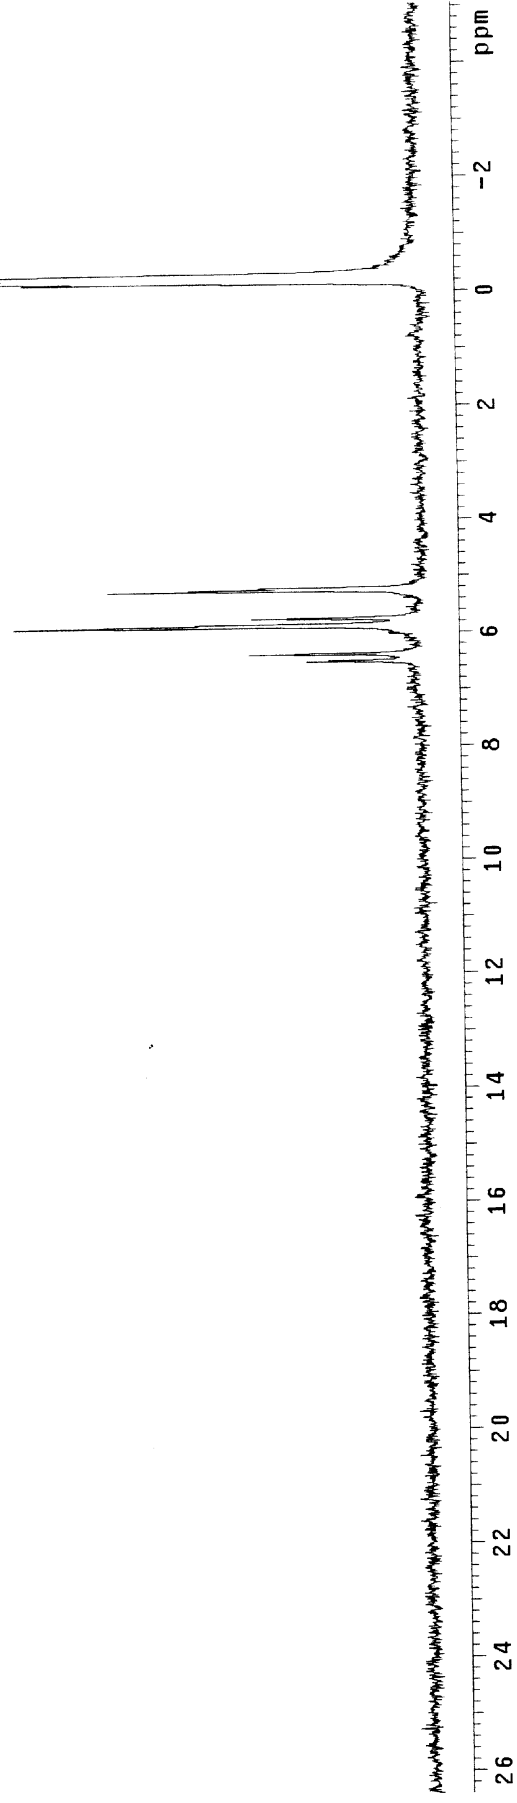

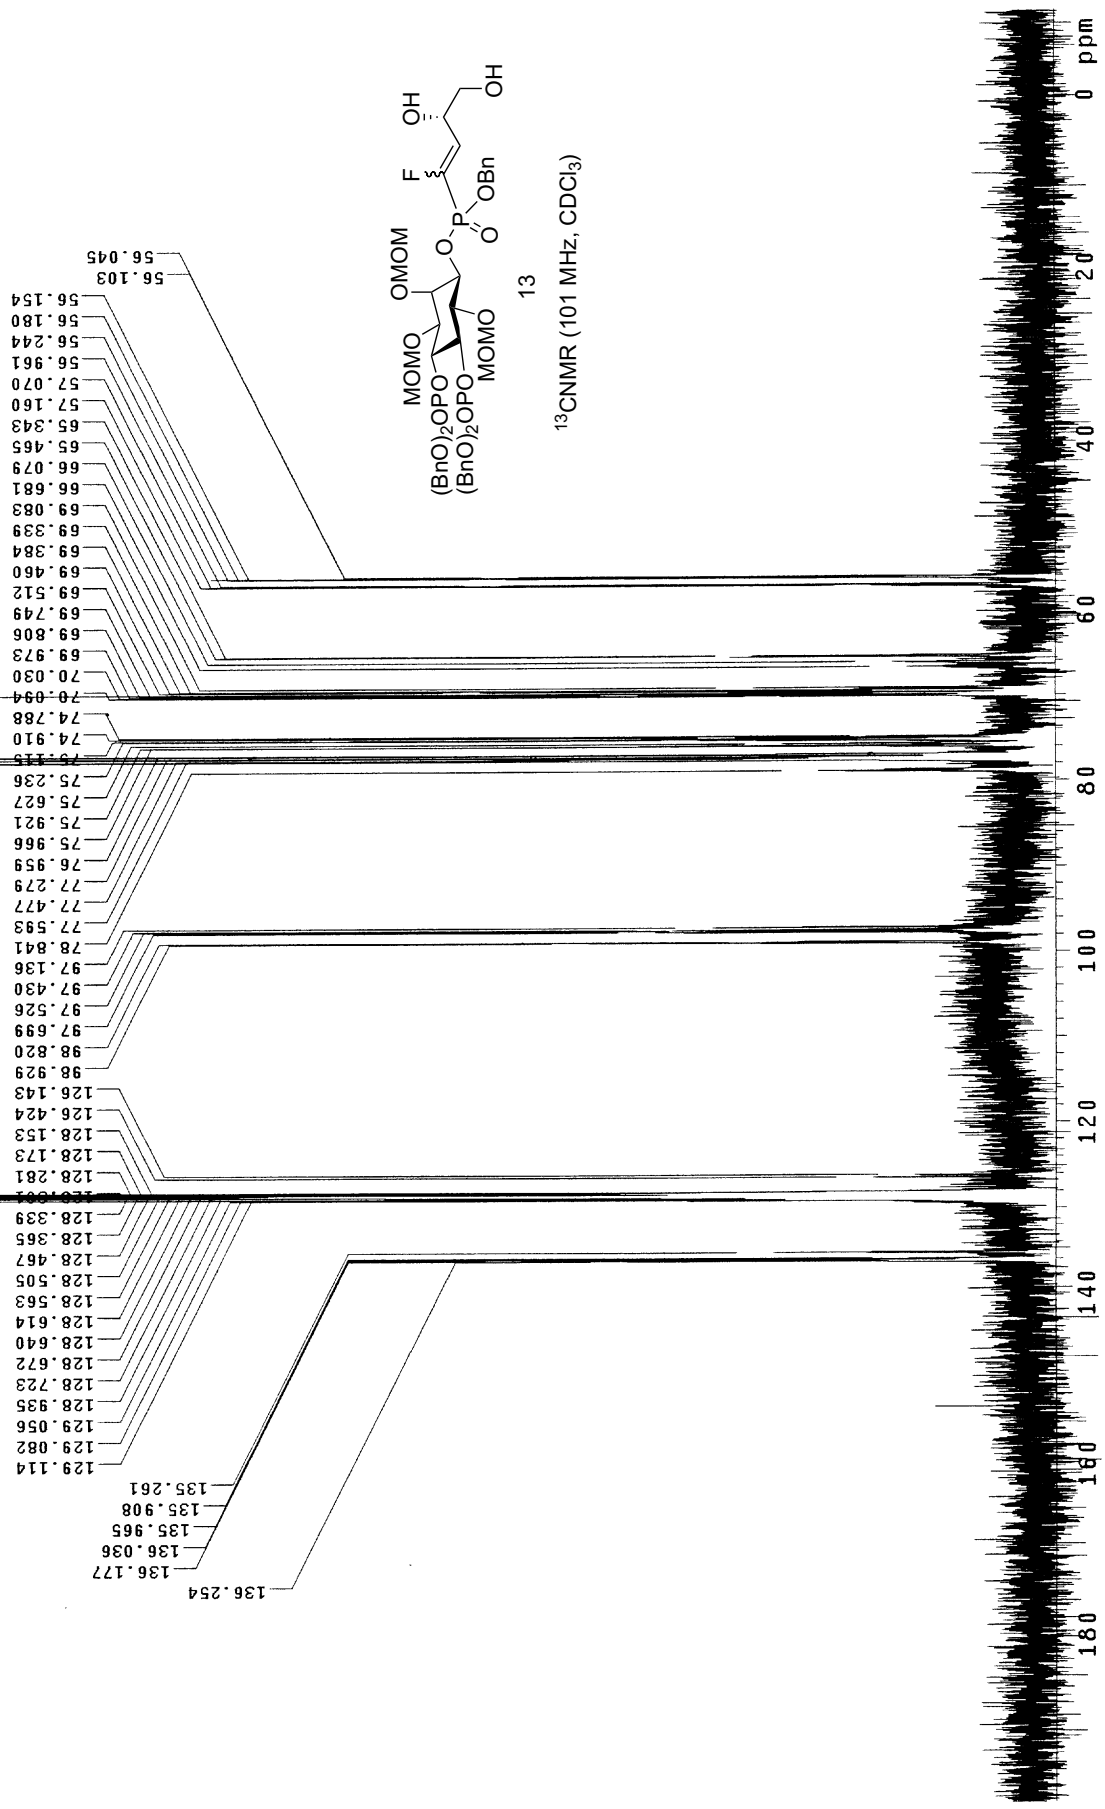

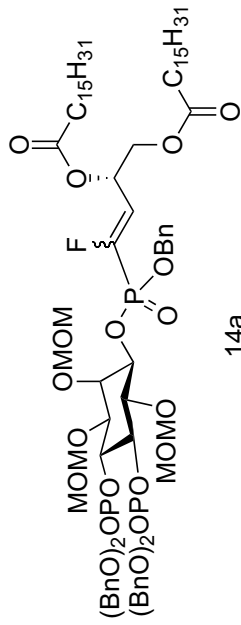

14a

<sup>1</sup>HNMR (400 MHz, CDCl<sub>3</sub>)

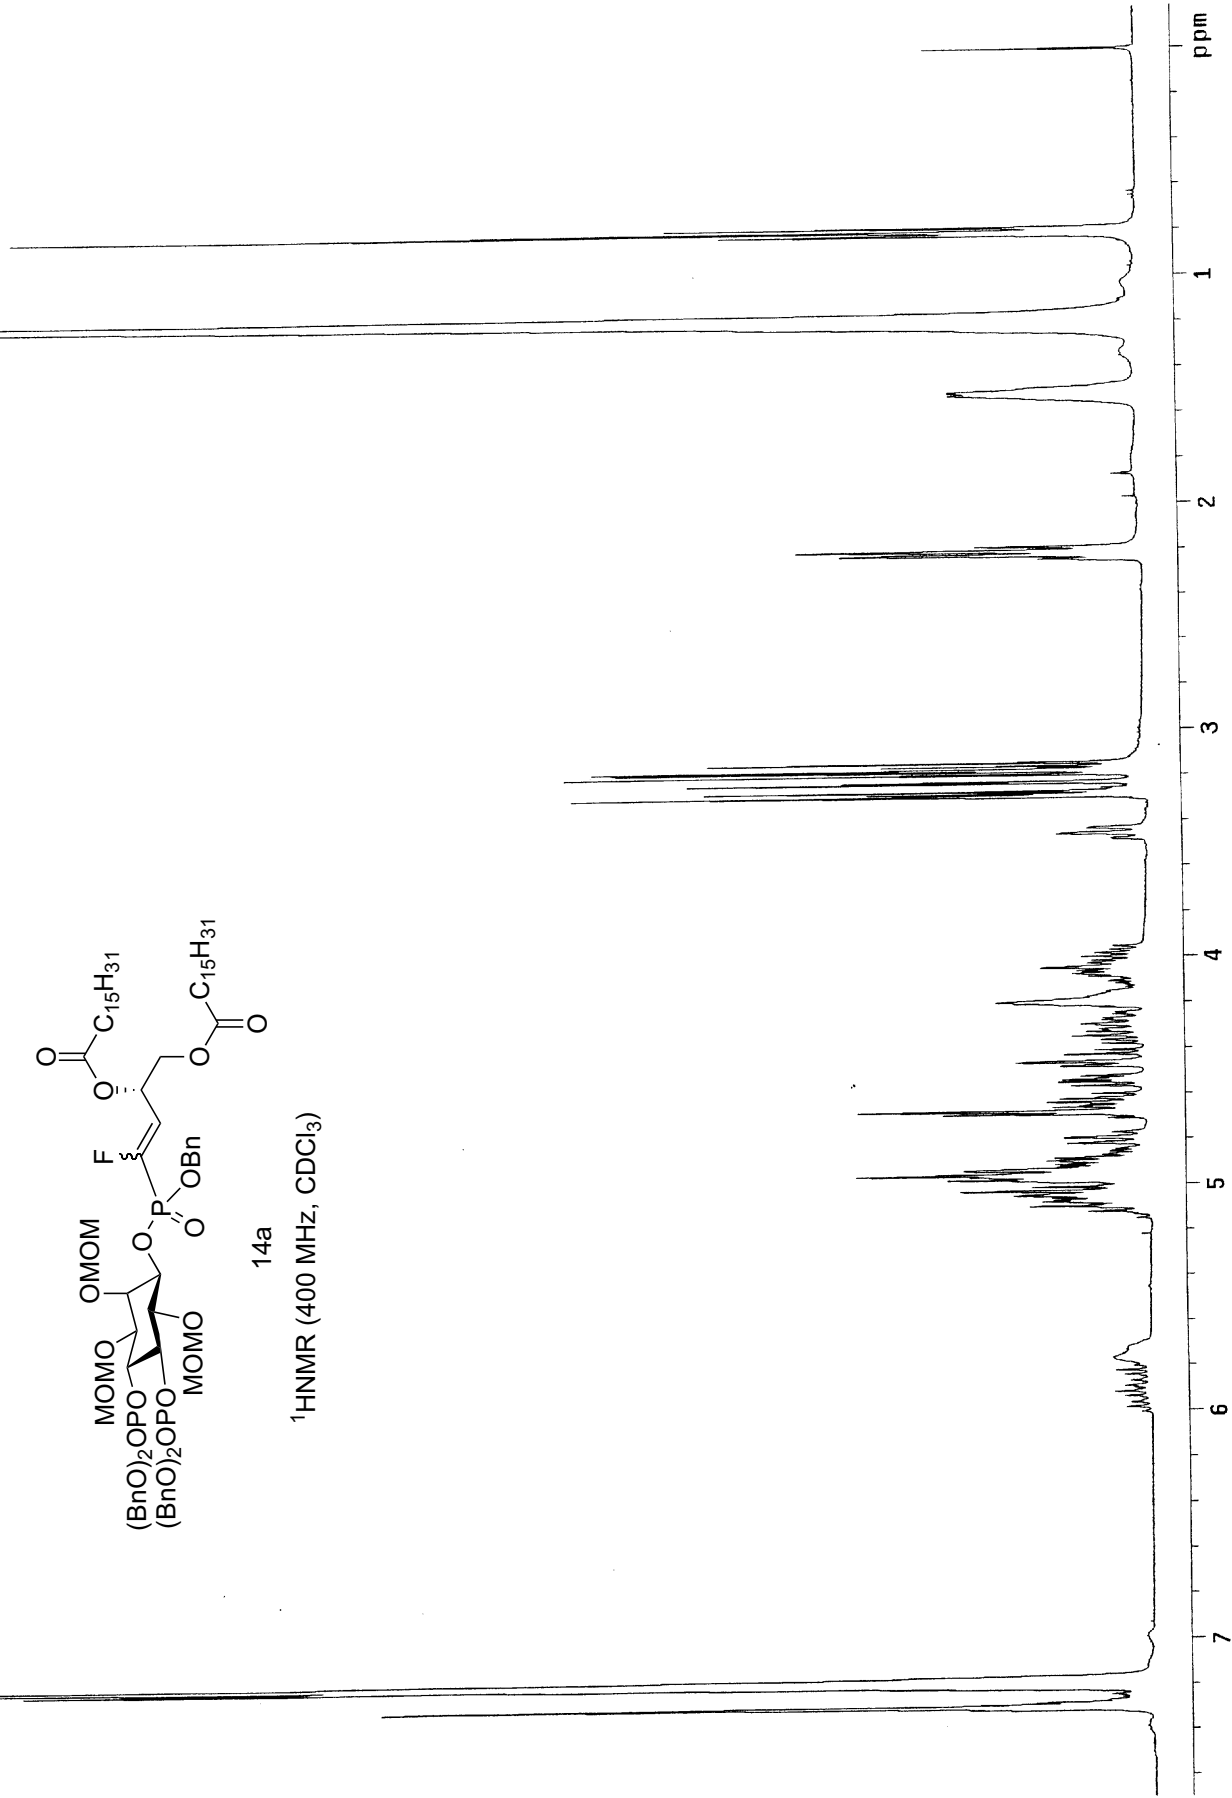

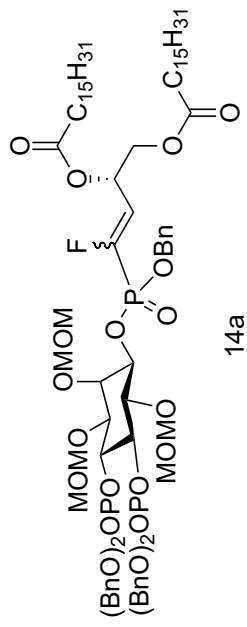

$^{19}\text{F}$ NMR (376 MHz,  $\text{CDCl}_3$ )

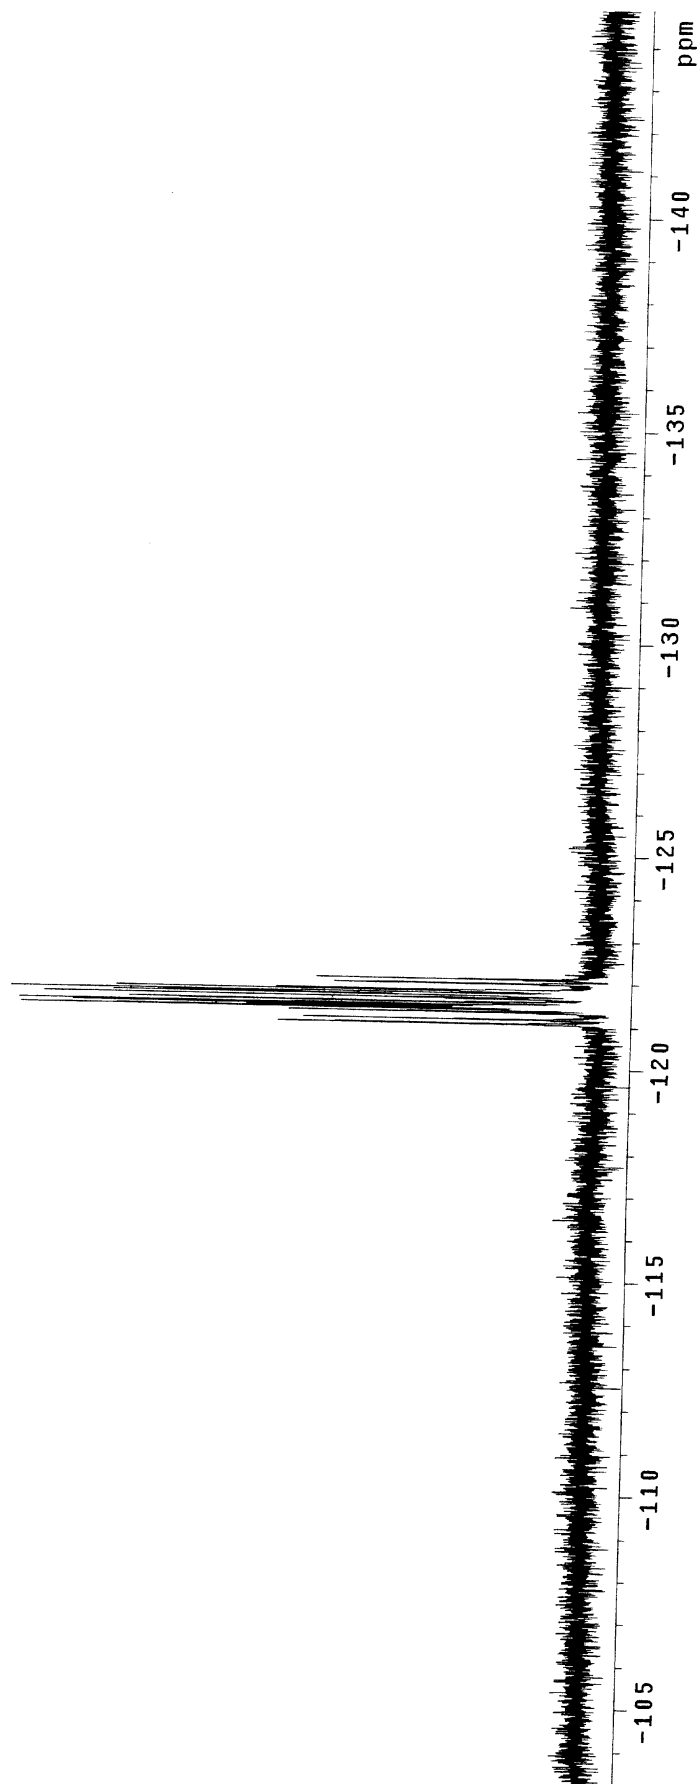

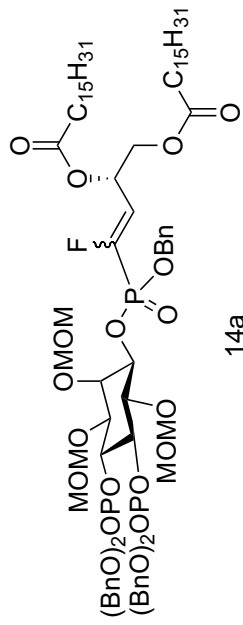

14a

<sup>31</sup>P NMR (162 MHz, CDCl<sub>3</sub>)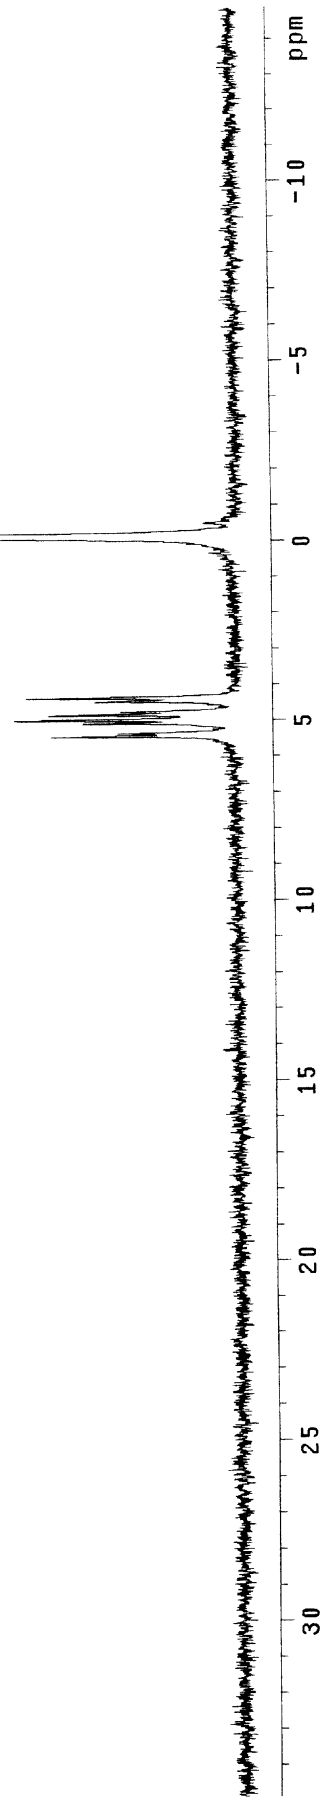

zh13071c

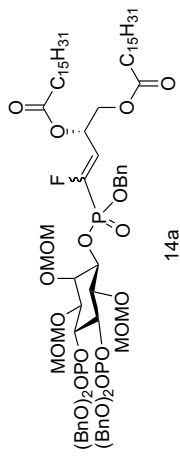

$^{13}\text{C}$ NMR (101 MHz,  $\text{CDCl}_3$ )

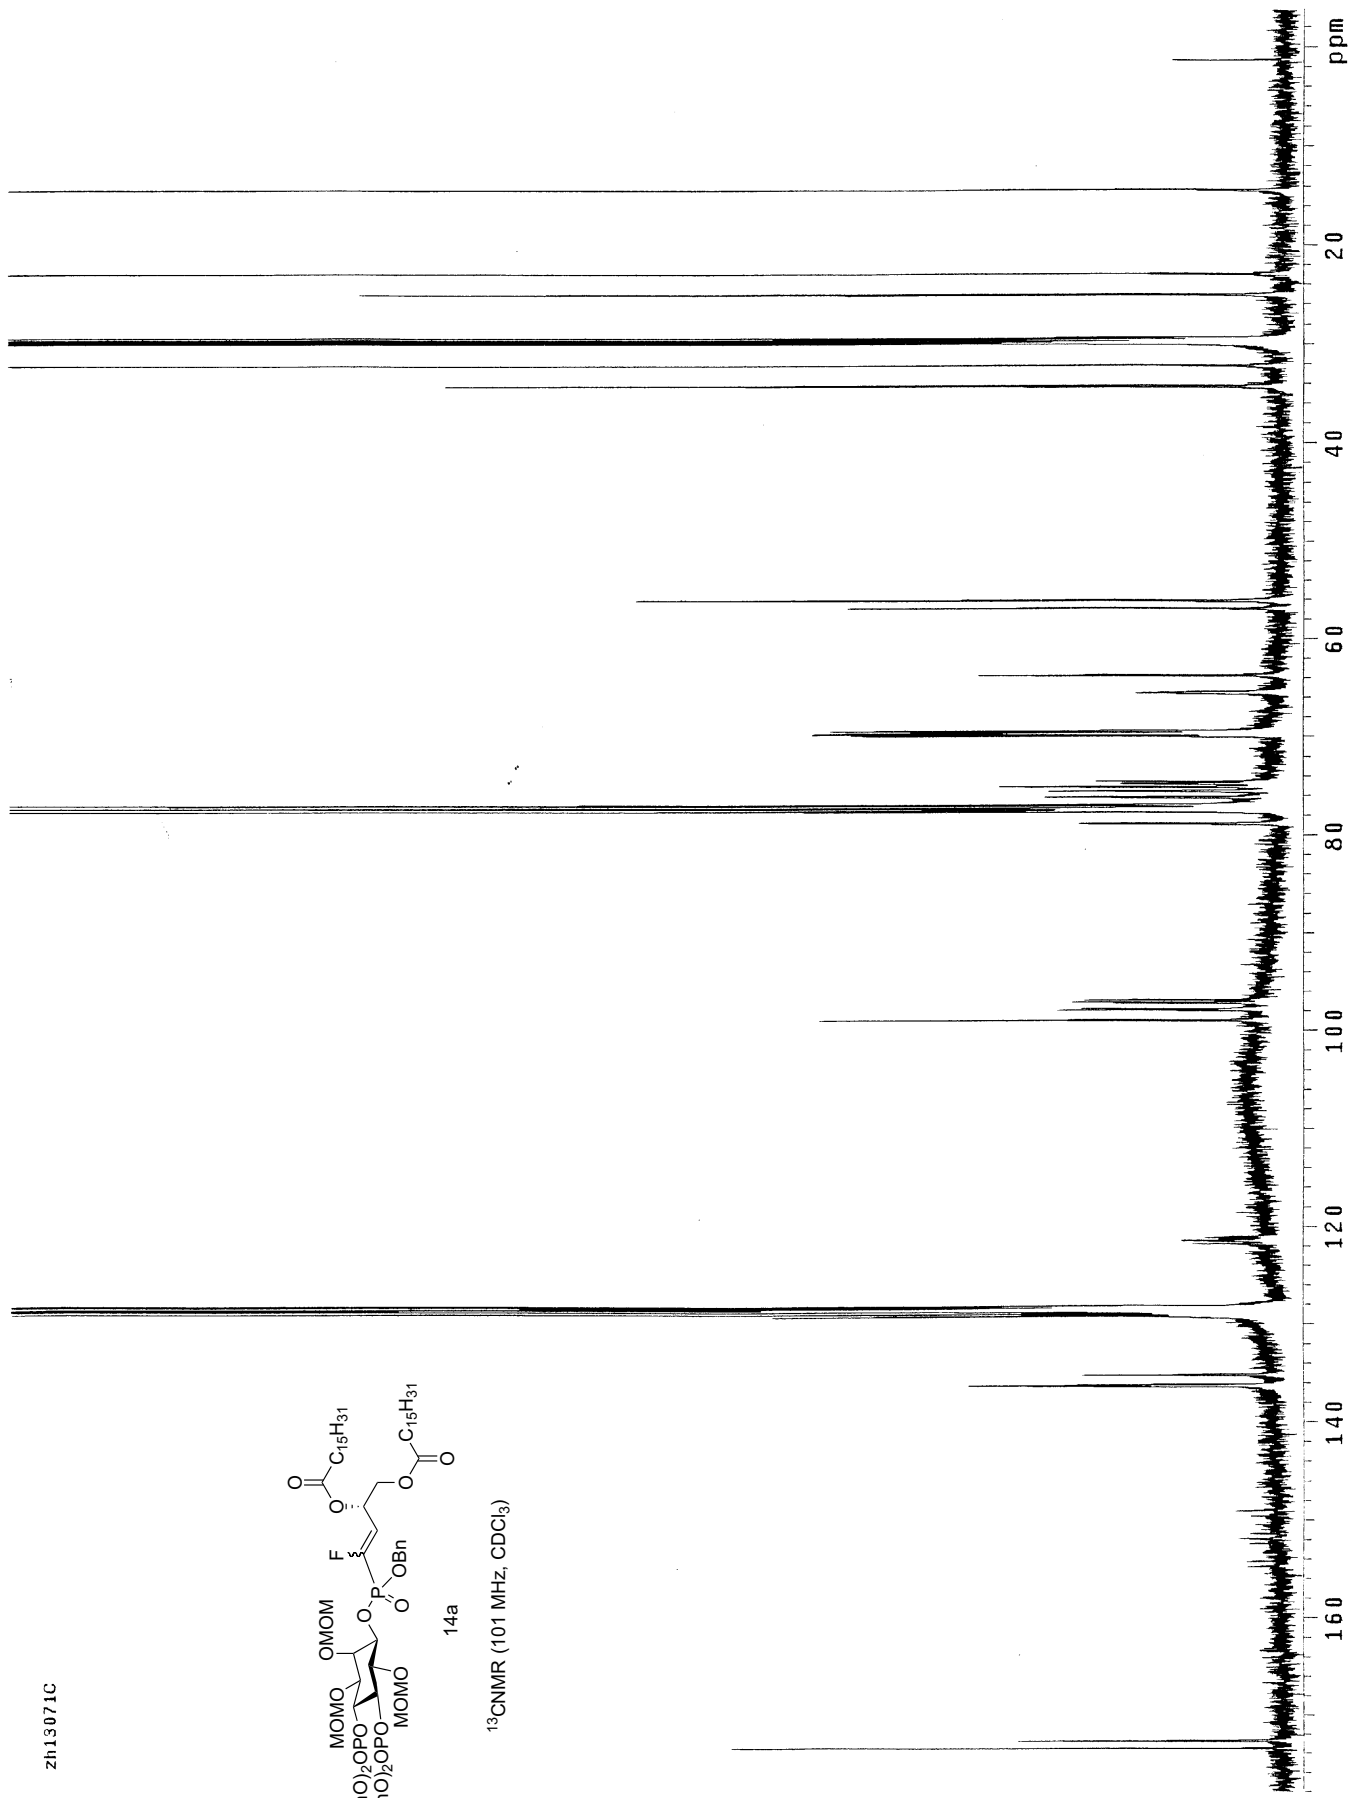

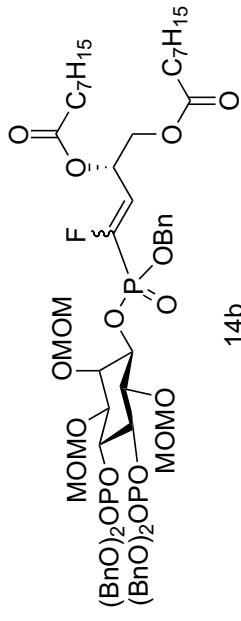

14b

<sup>1</sup>H NMR (400 MHz, CDCl<sub>3</sub>)

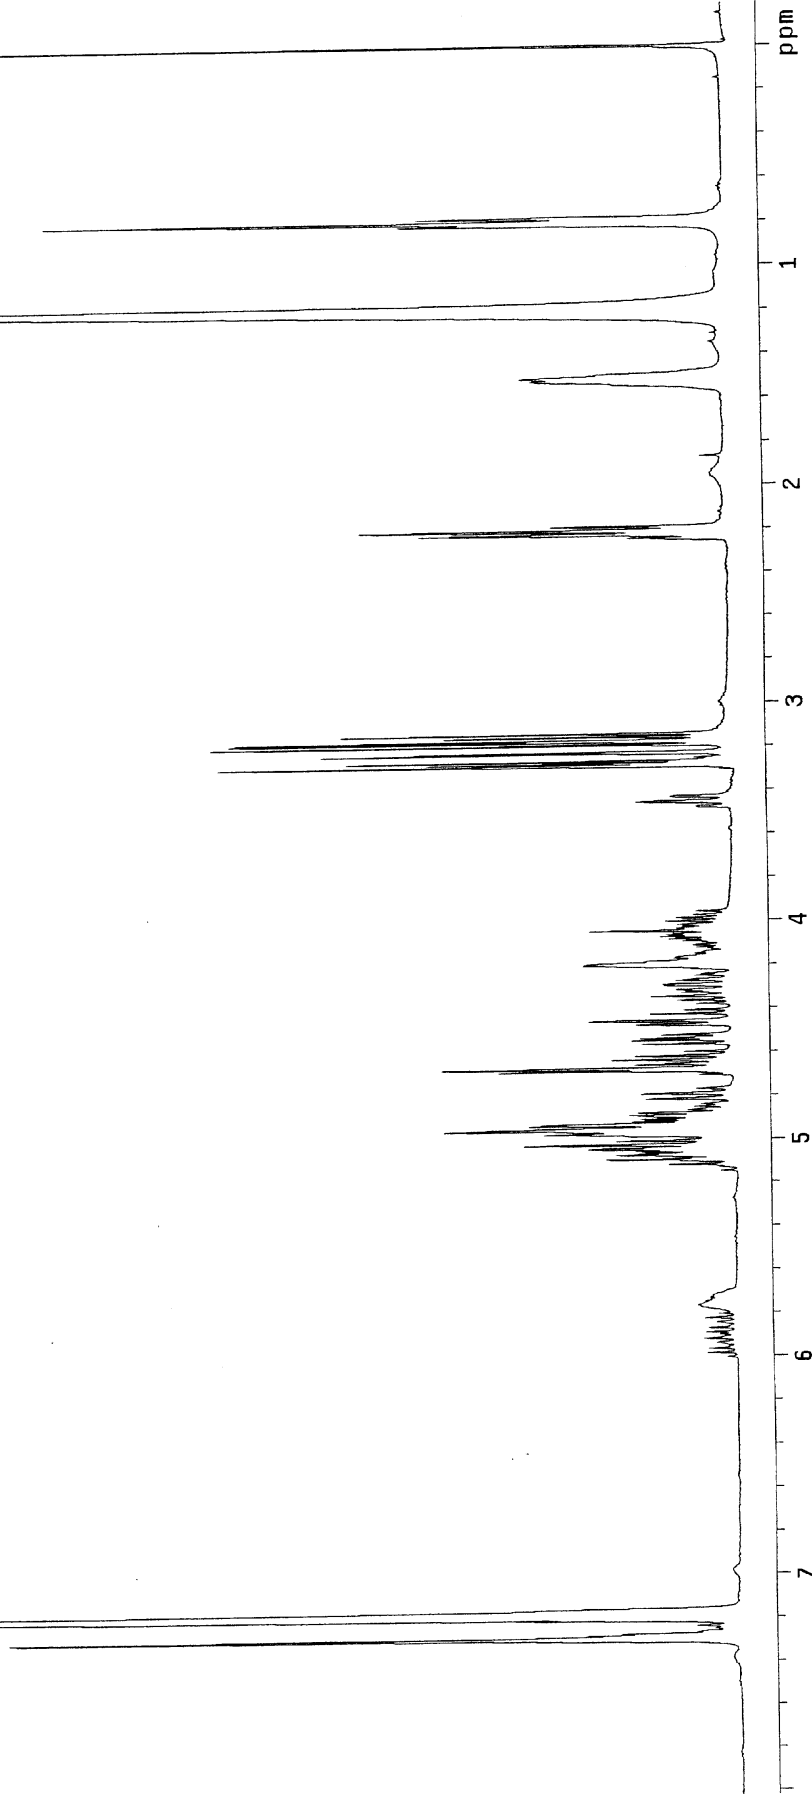

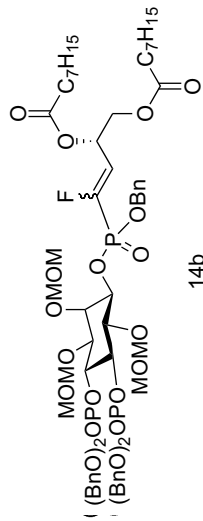

14b

<sup>19</sup>F NMR (376 MHz, CDCl<sub>3</sub>)

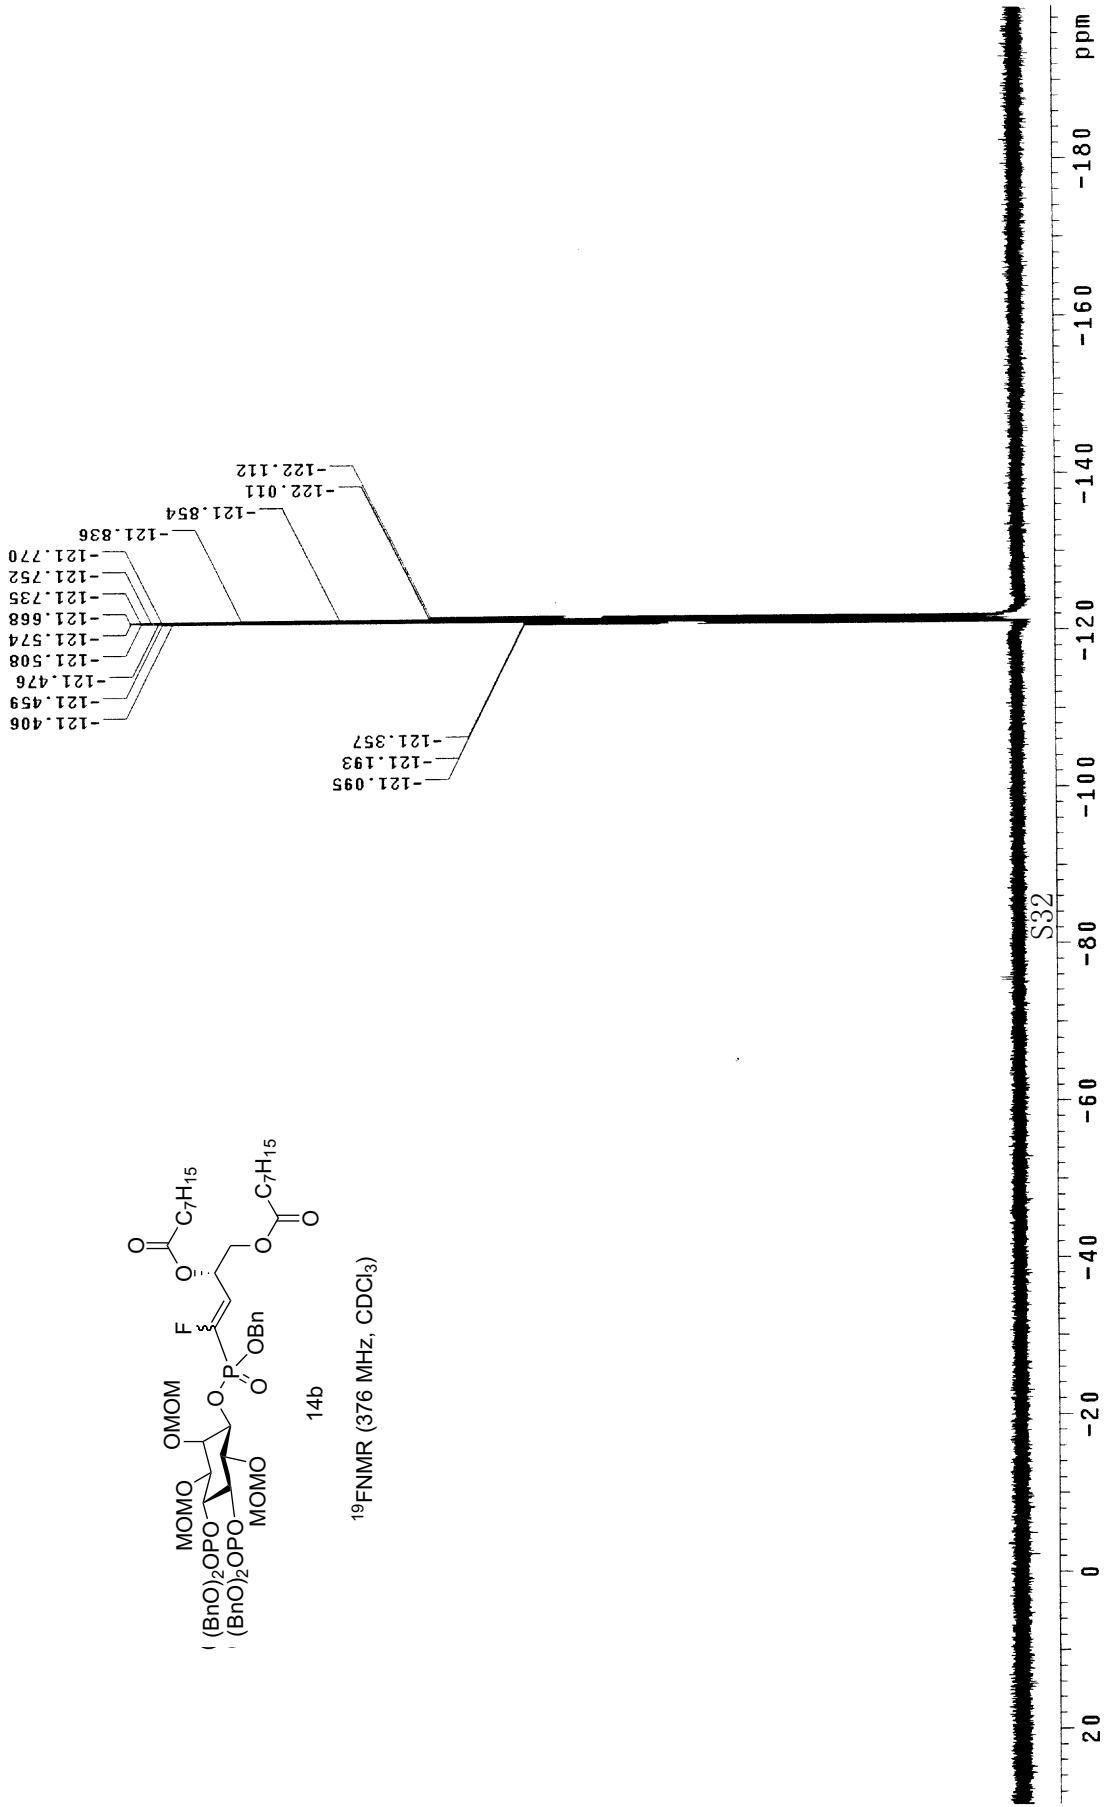



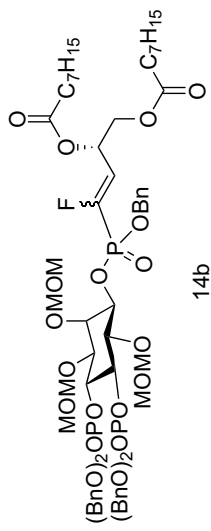

$^3\text{P}$ NMR (162 MHz,  $\text{CDCl}_3$ )

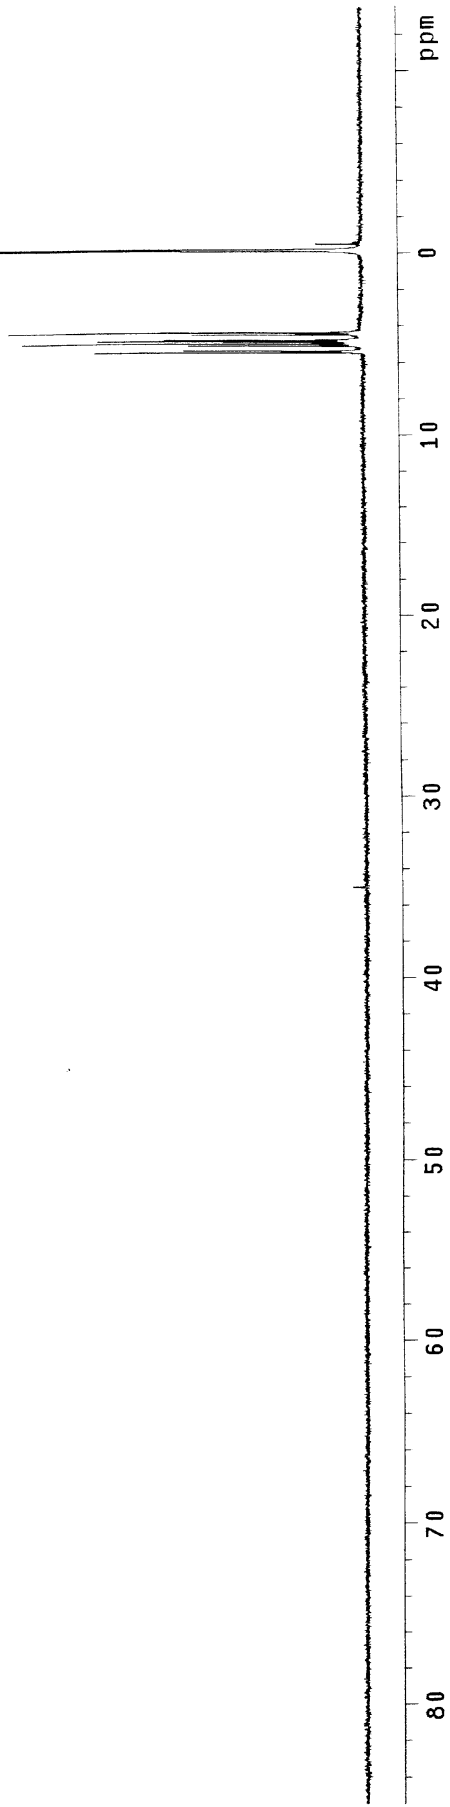

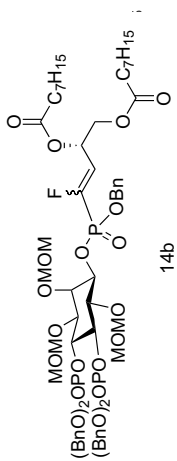

14b  
<sup>13</sup>CNMR (101 MHz, CDCl<sub>3</sub>)

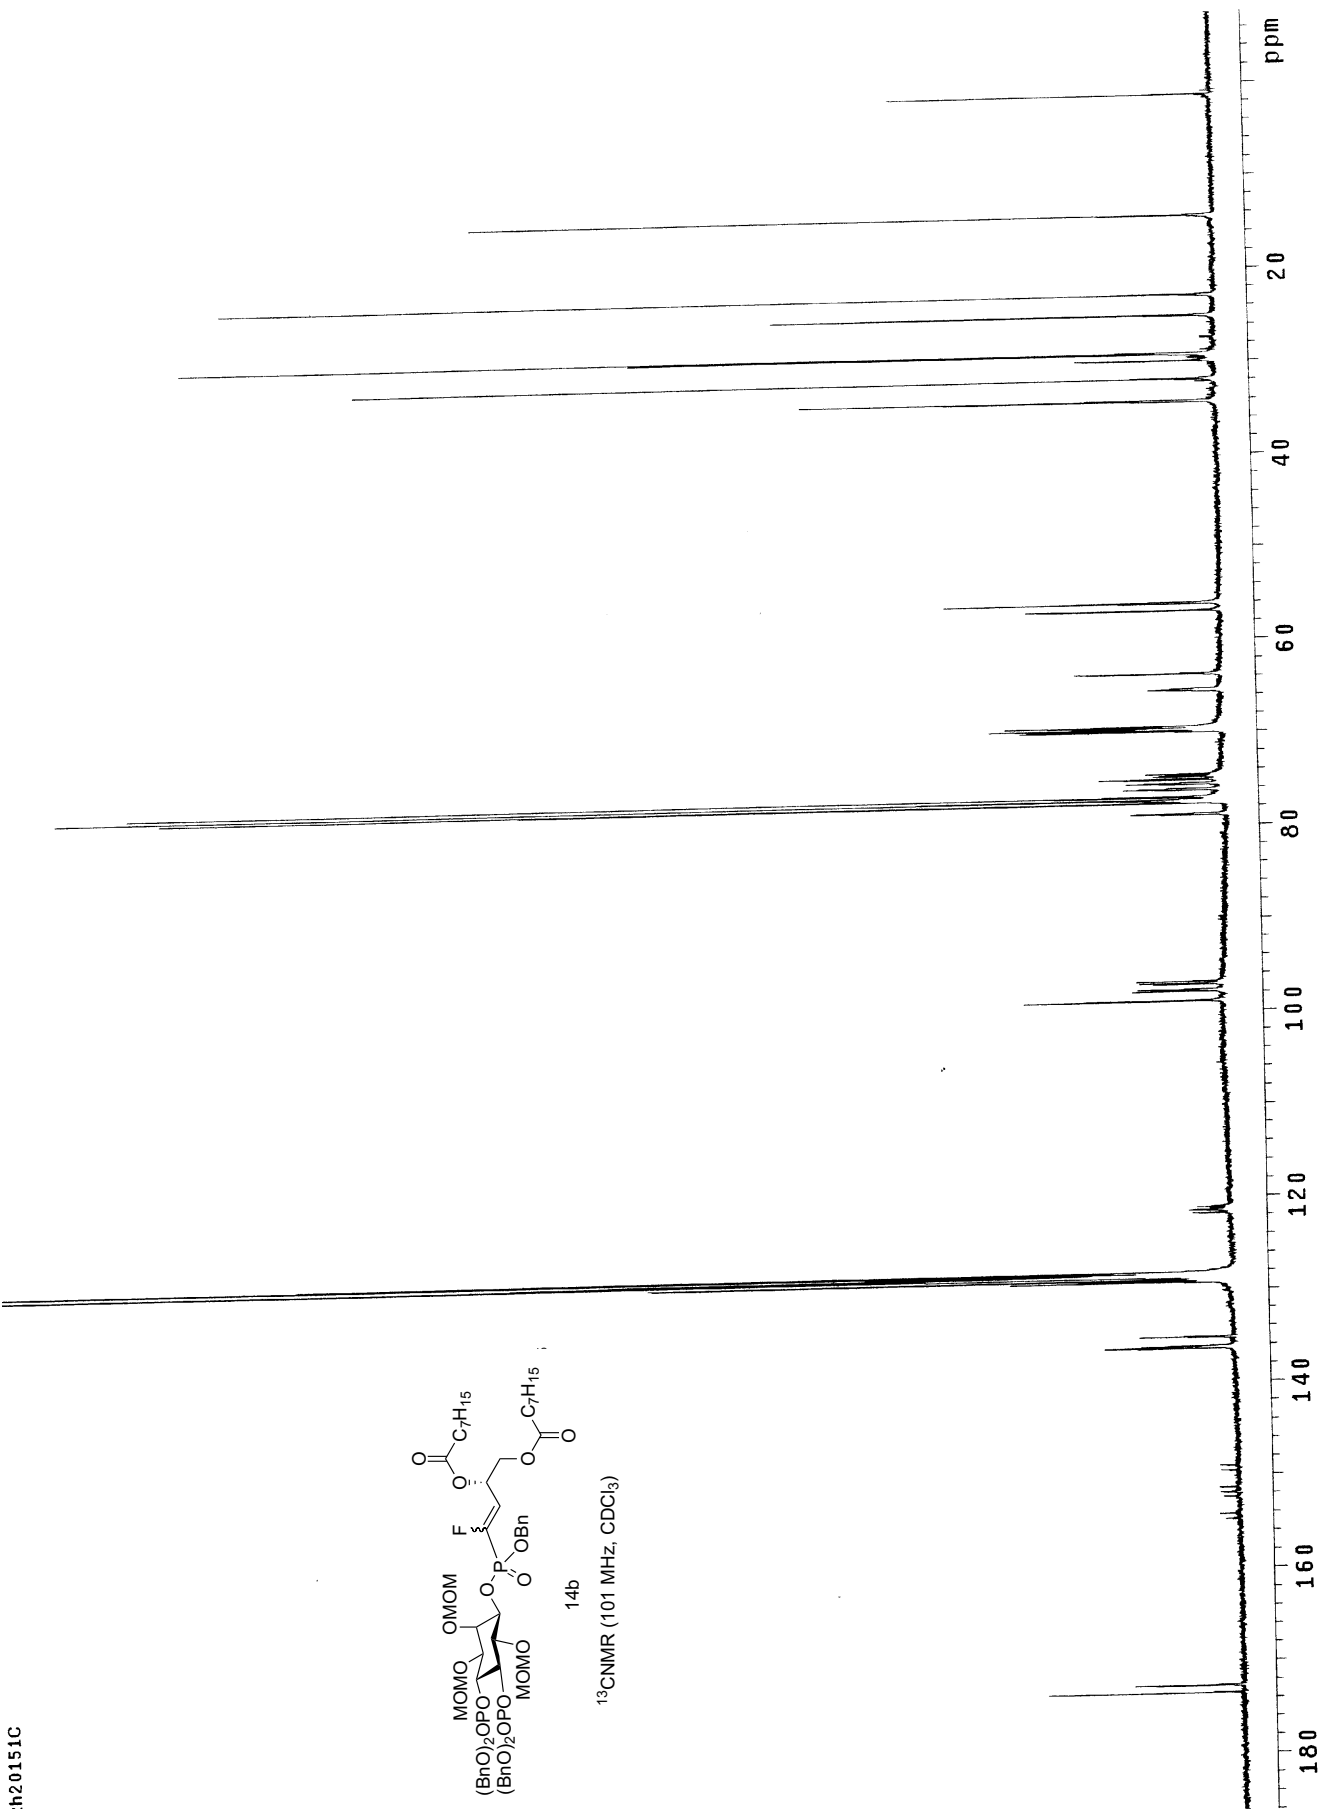

zh20291

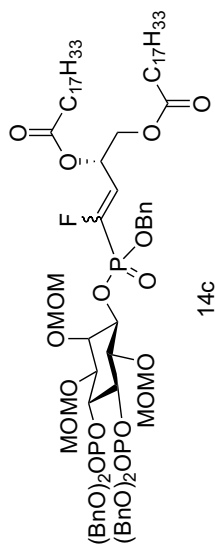

<sup>1</sup>H NMR (400 MHz, CDCl<sub>3</sub>)

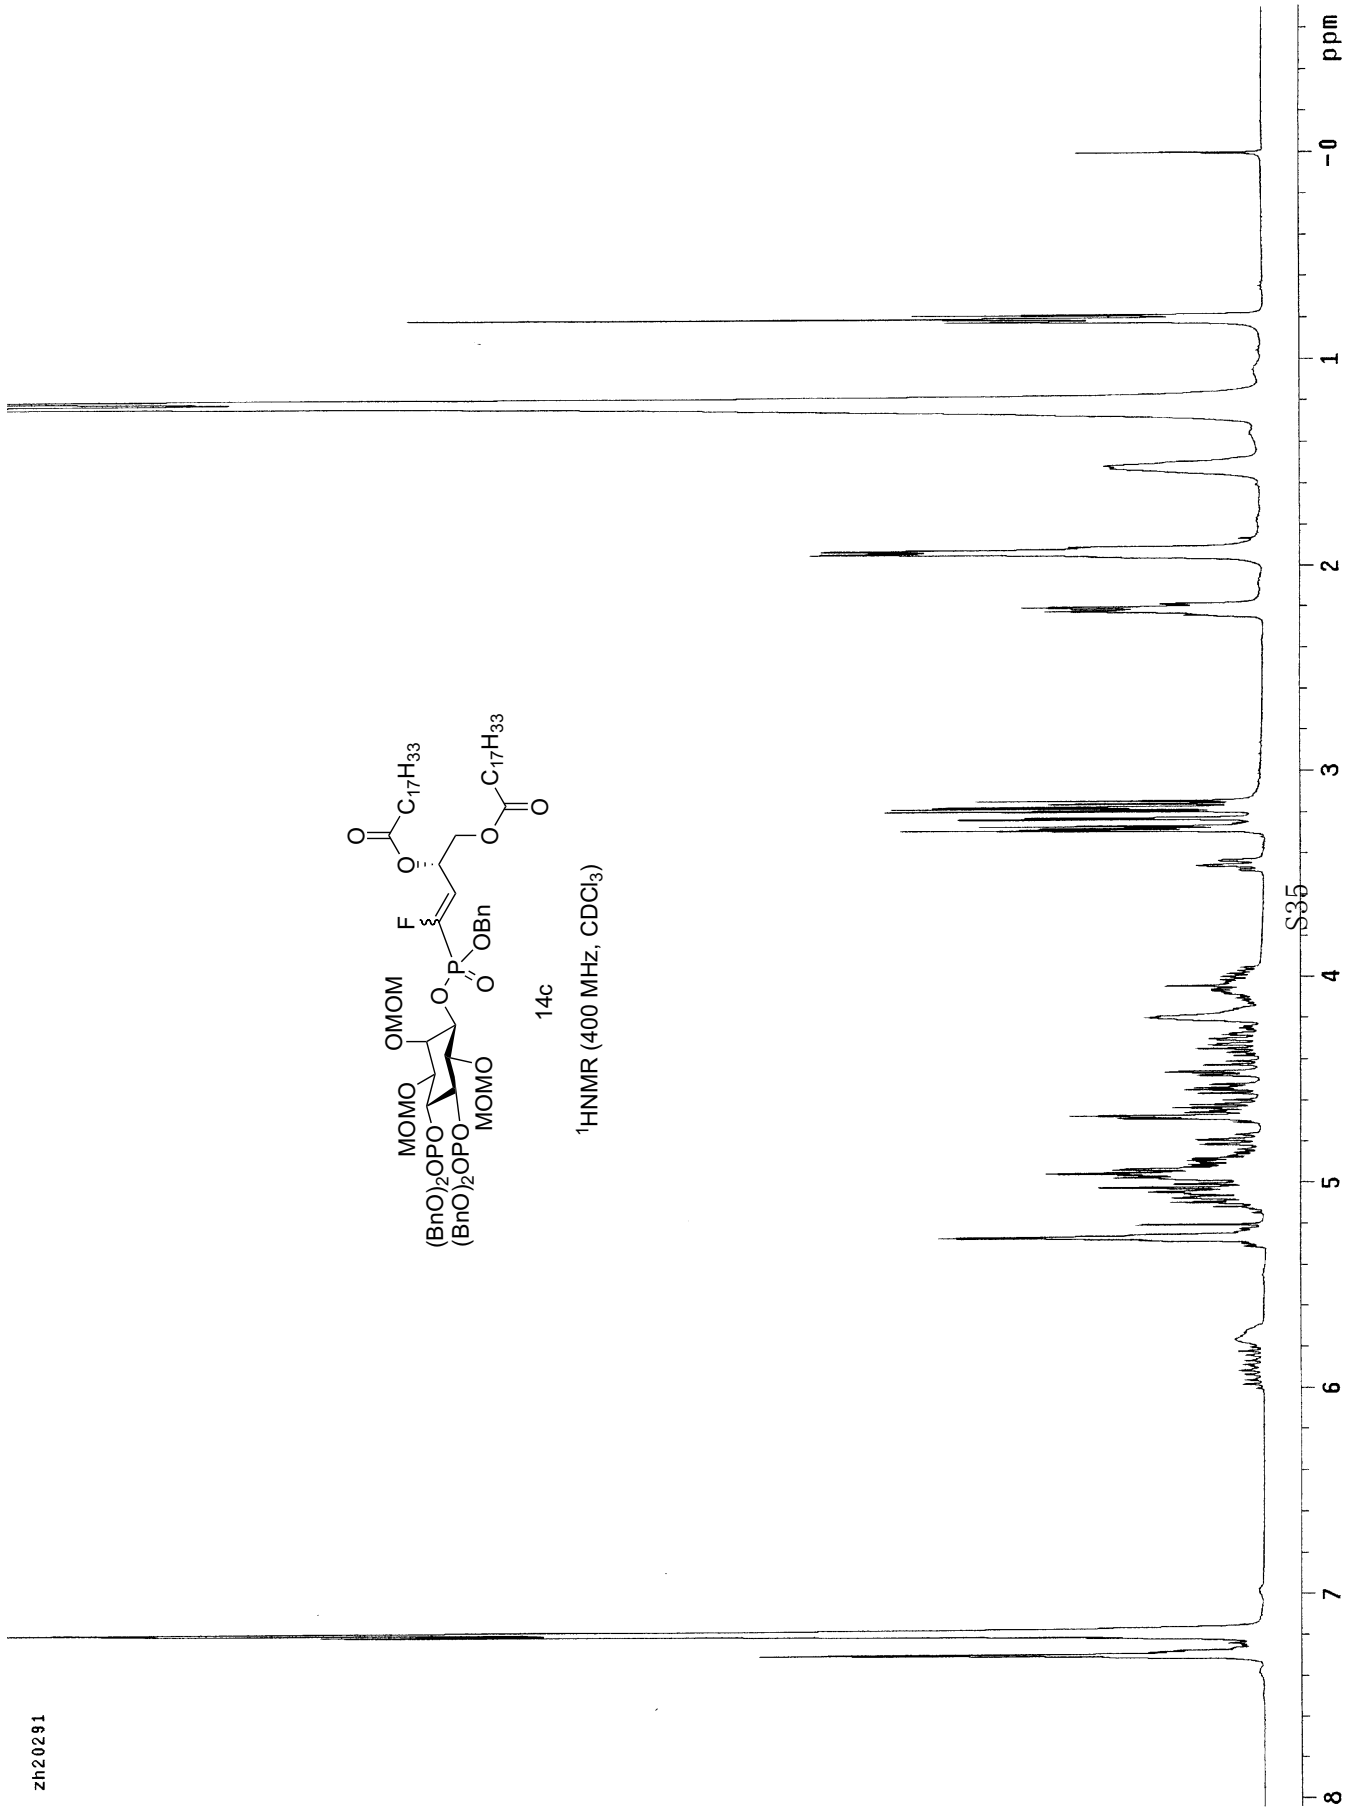

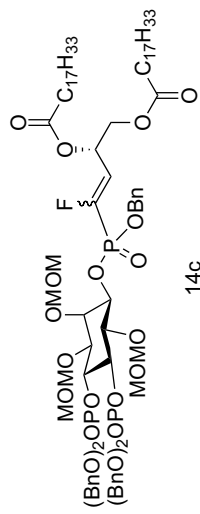

14c

<sup>19</sup>F NMR (376 MHz, CDCl<sub>3</sub>)

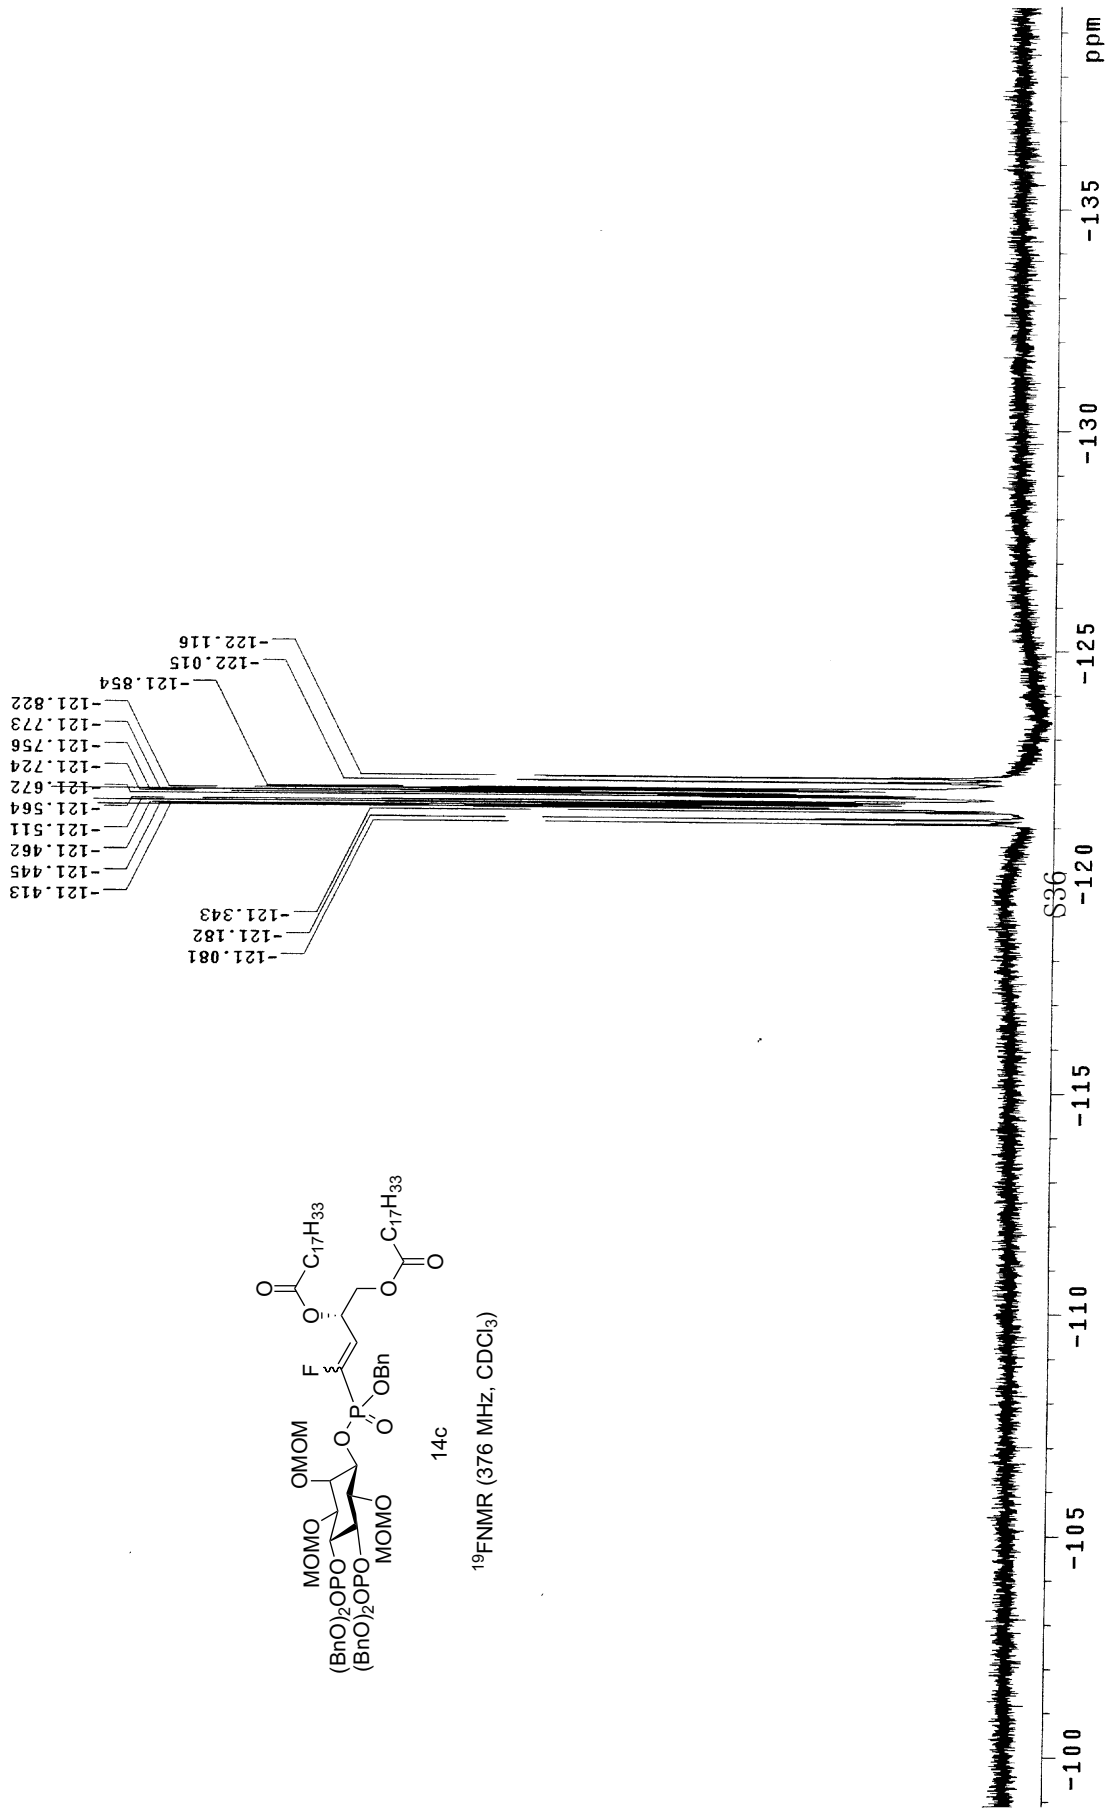

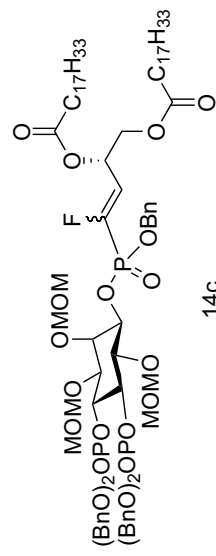

$^{31}\text{P}$ NMR (162 MHz,  $\text{CDCl}_3$ )

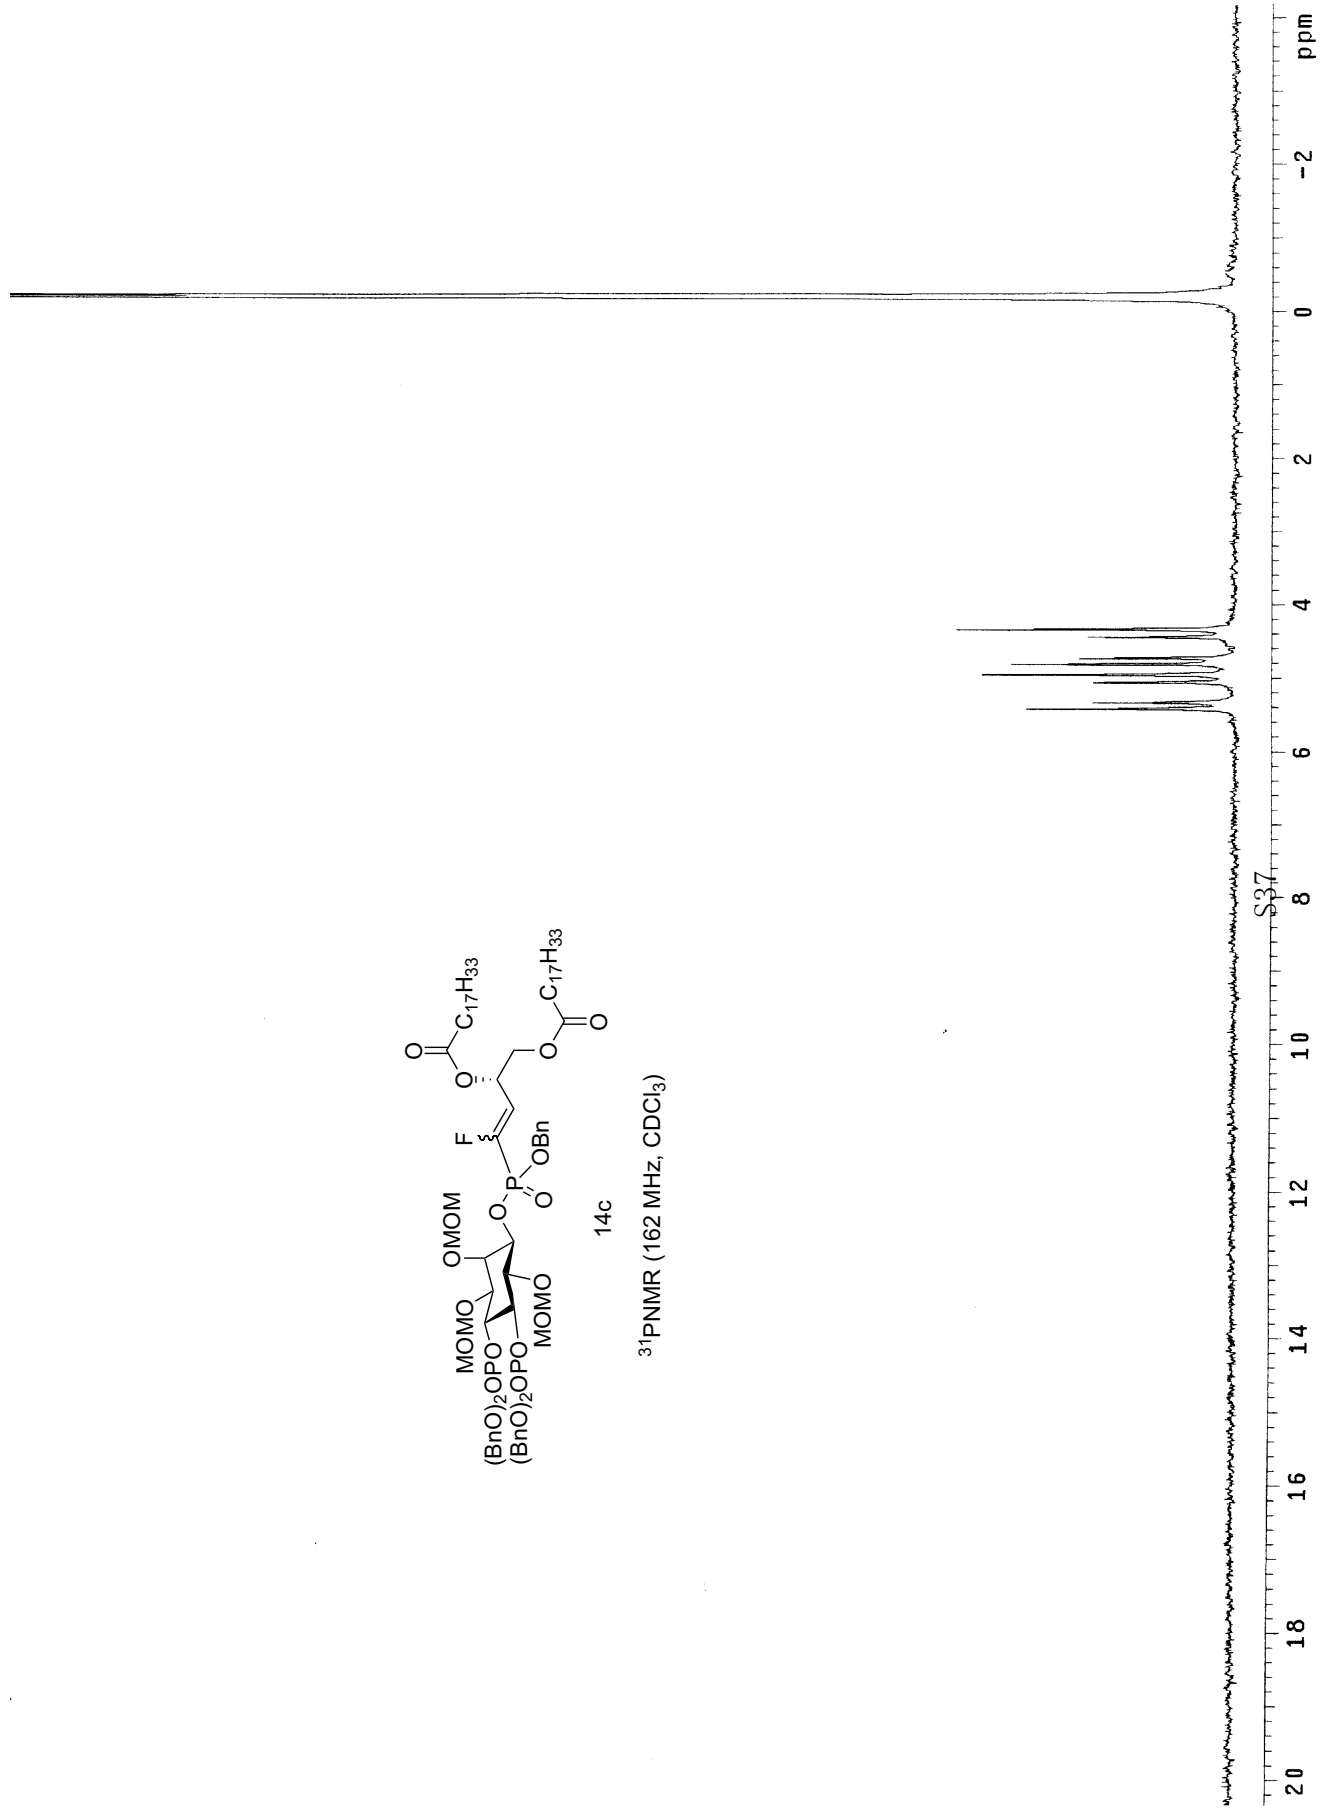

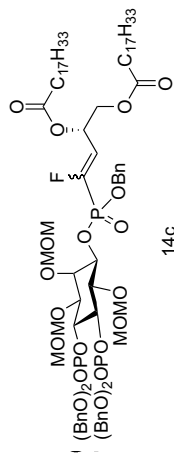

<sup>13</sup>CNMR (101 MHz, CDCl<sub>3</sub>)

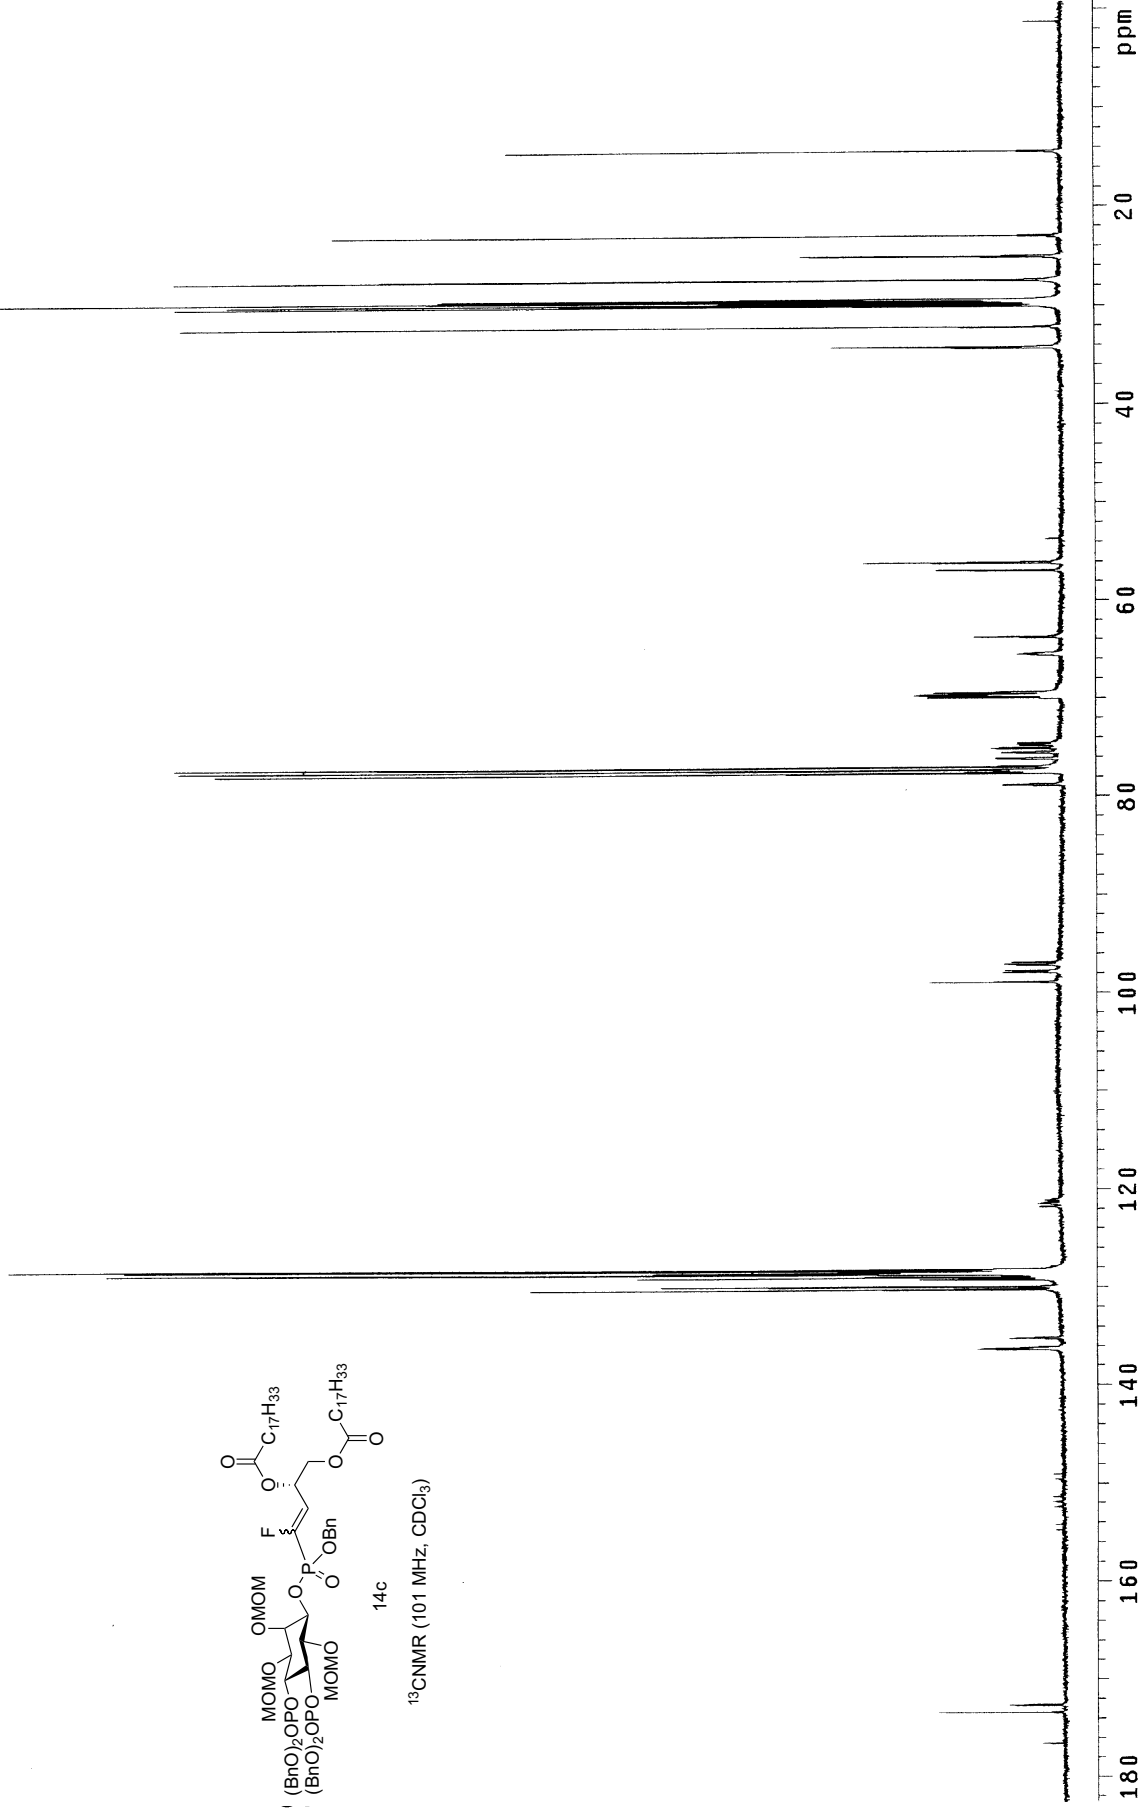

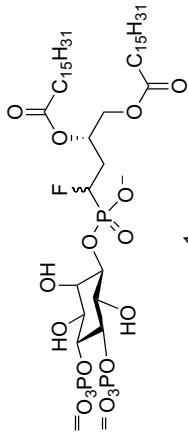

1

<sup>1</sup>H NMR (400 MHz, CDCl<sub>3</sub>/CD<sub>3</sub>OD=1:1)

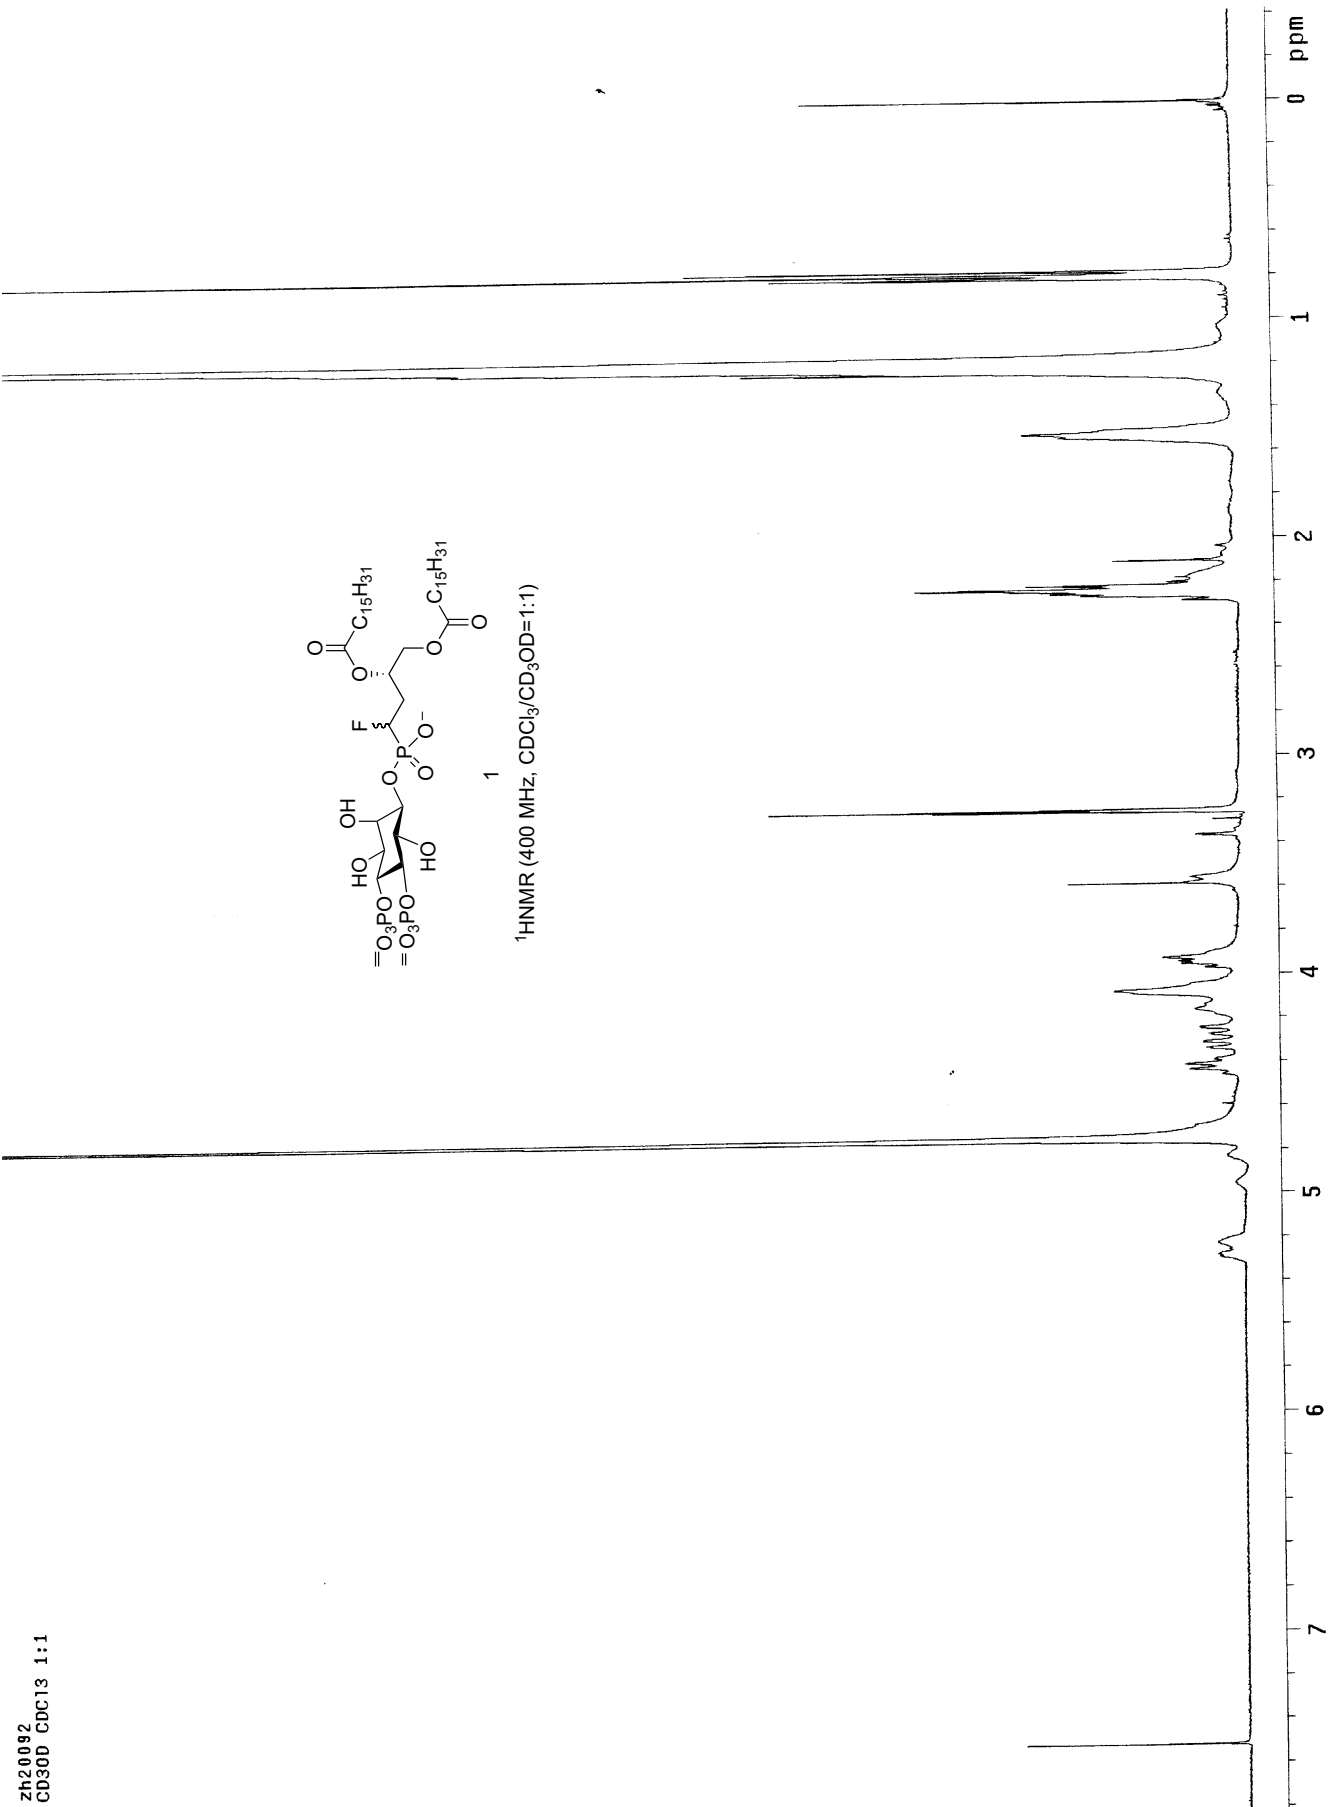

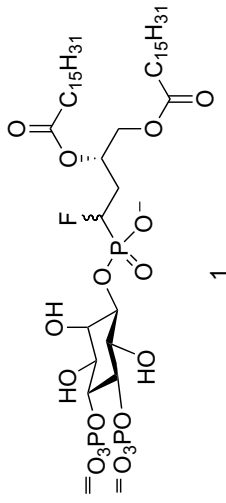

<sup>19</sup>F NMR (376 MHz, CDCl<sub>3</sub>/CD<sub>3</sub>OD=1:1)

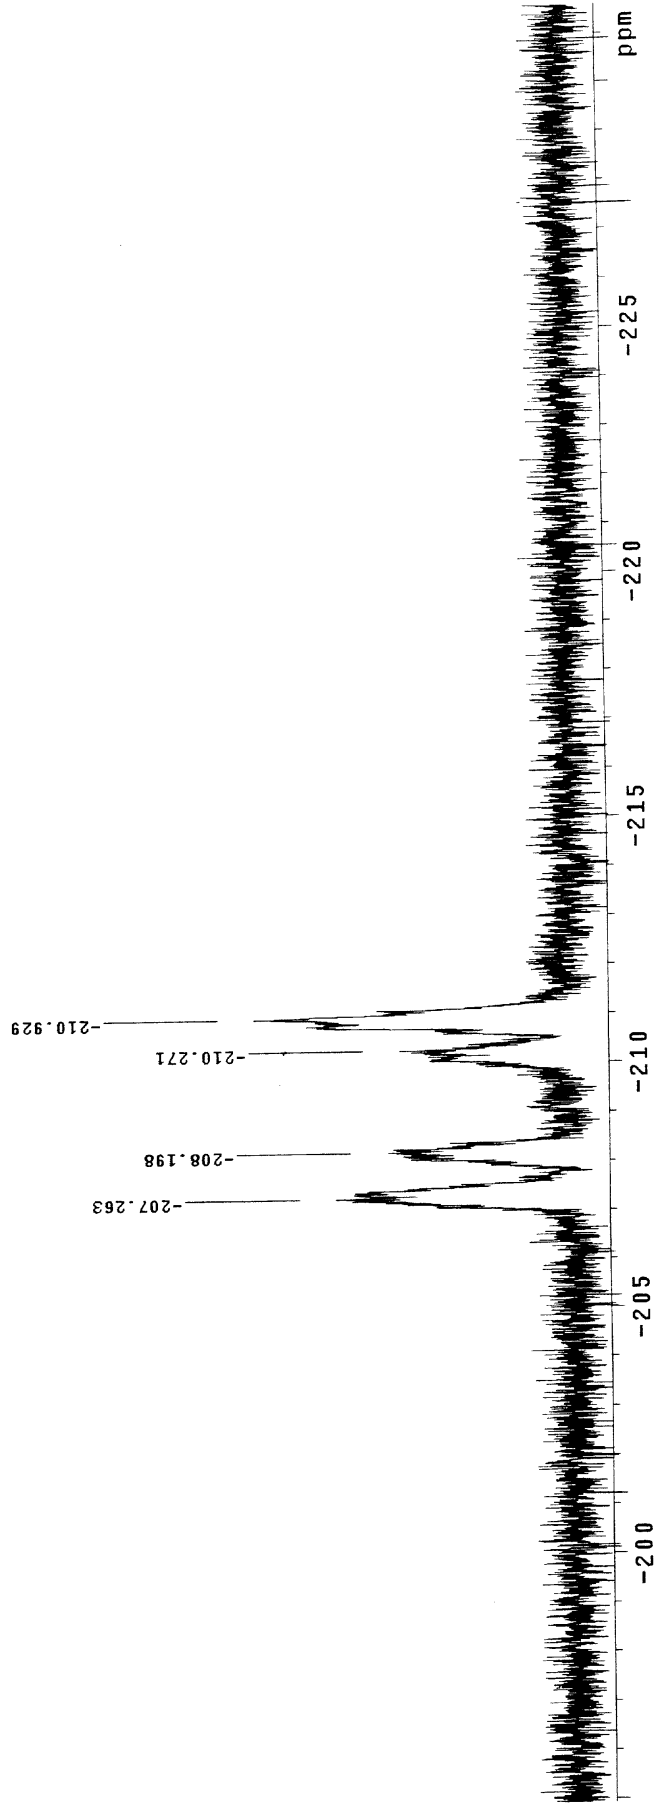



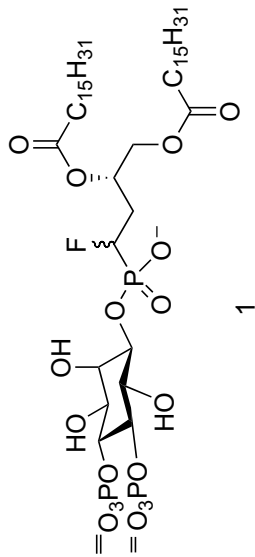

<sup>31</sup>P NMR (162 MHz, CDCl<sub>3</sub>/CD<sub>3</sub>OD=1:1)

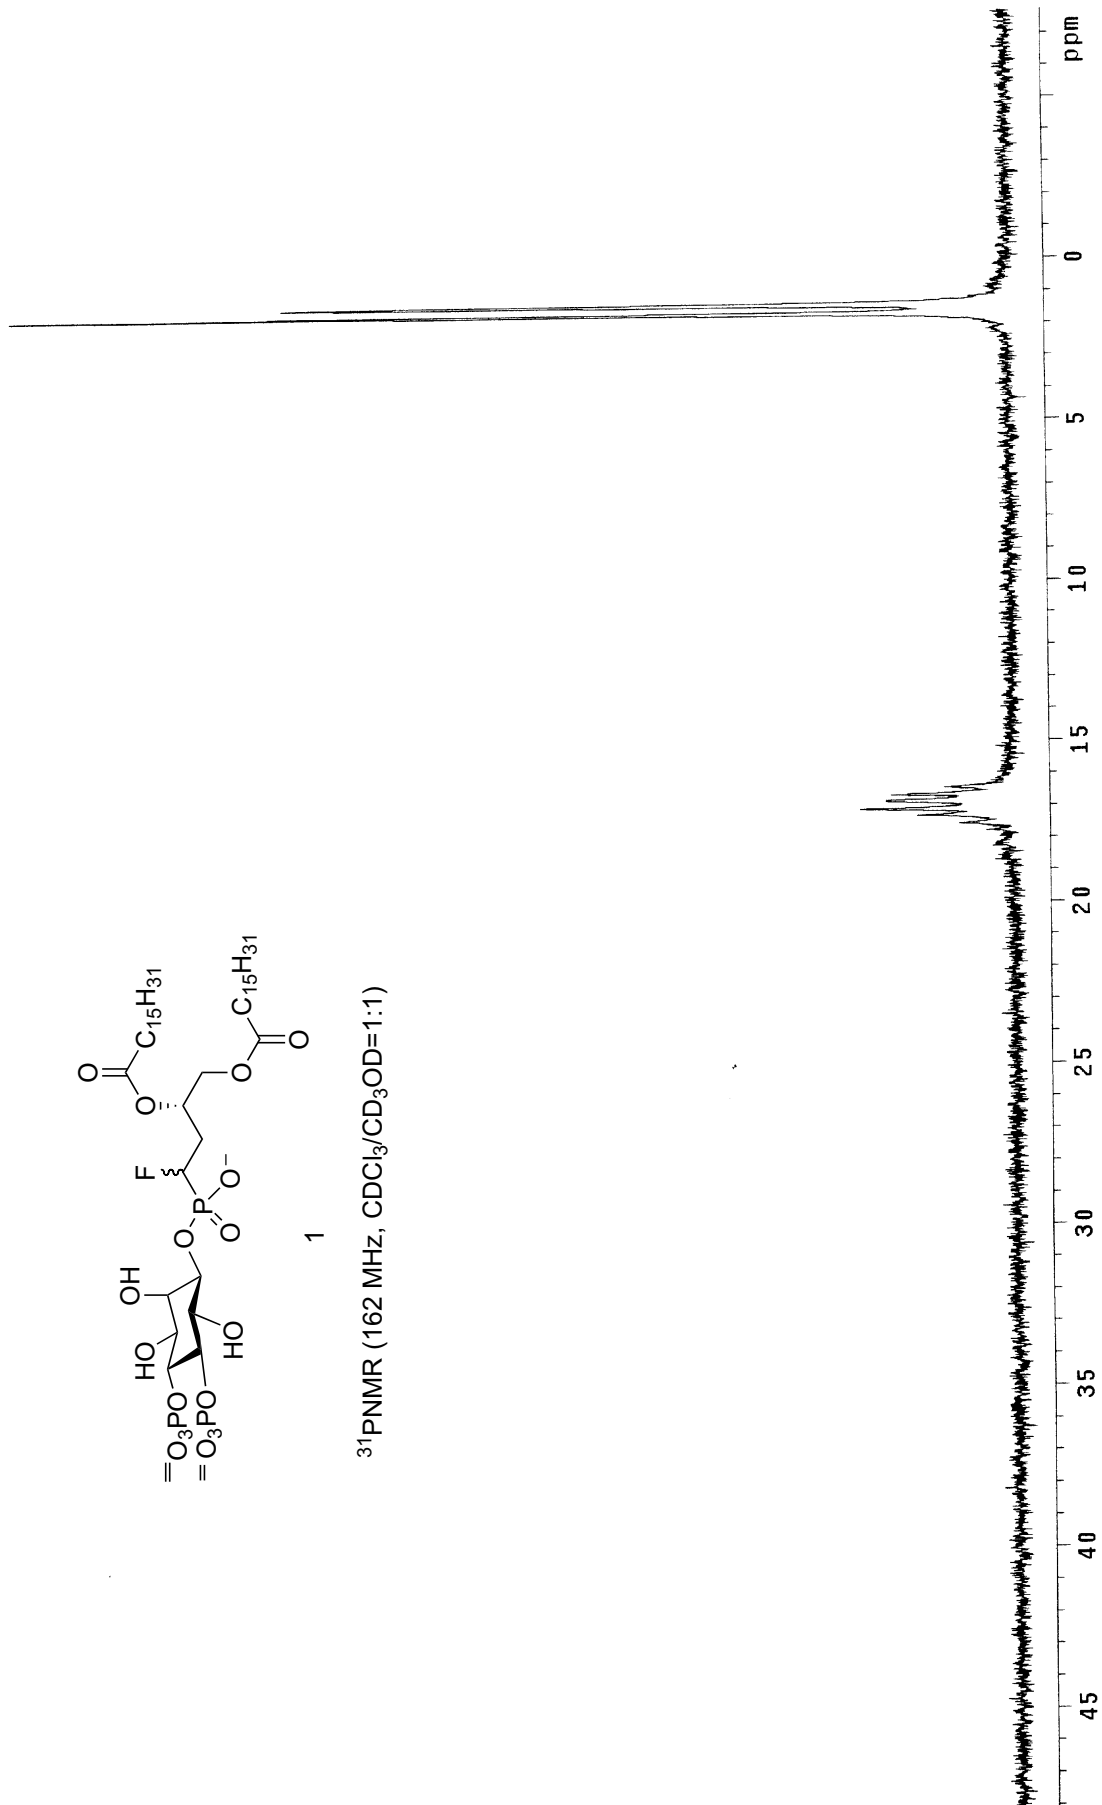

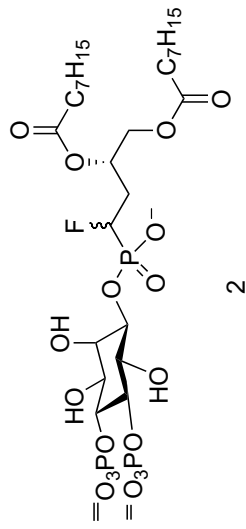

<sup>1</sup>H NMR (400 MHz, CDCl<sub>3</sub>/CD<sub>3</sub>OD=1:1)

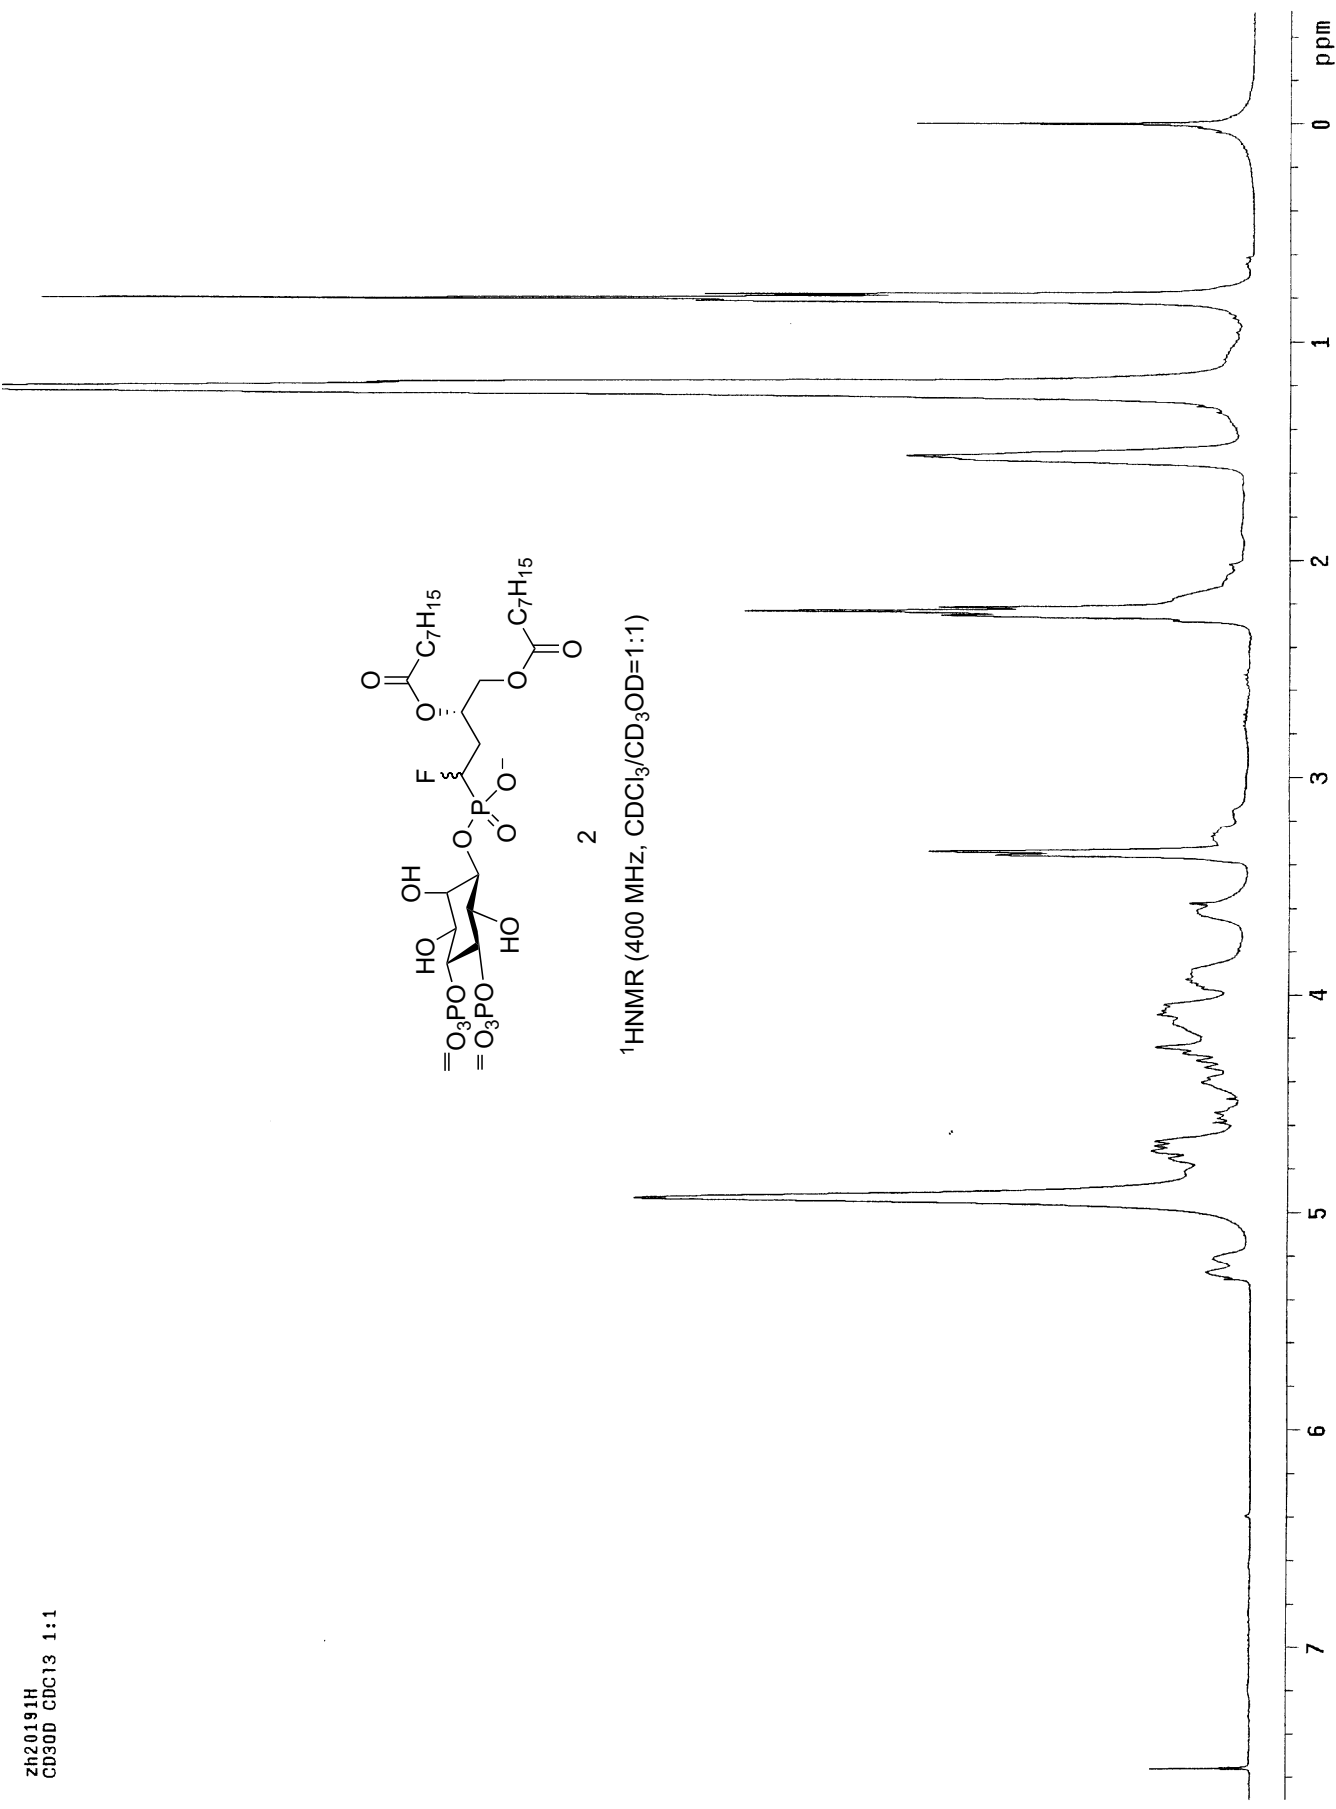

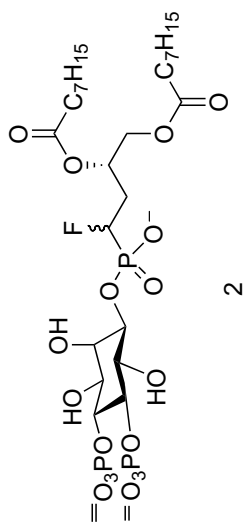

<sup>19</sup>F NMR (376 MHz, CDCl<sub>3</sub>/CD<sub>3</sub>OD=1:1)

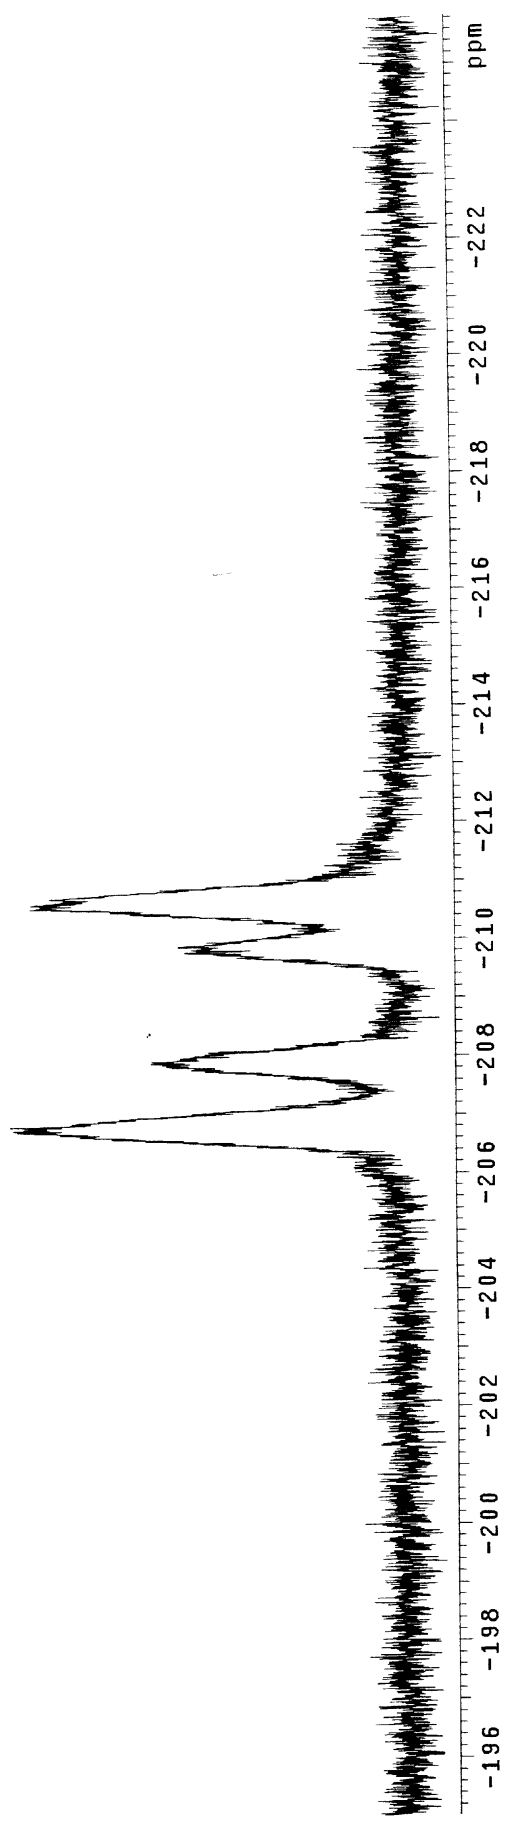

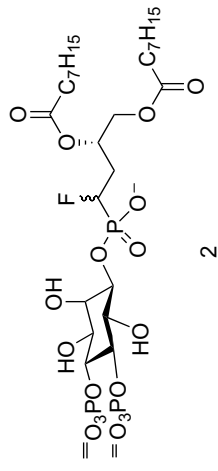

<sup>31</sup>P NMR (162 MHz, CDCl<sub>3</sub>/CD<sub>3</sub>OD=1:1)

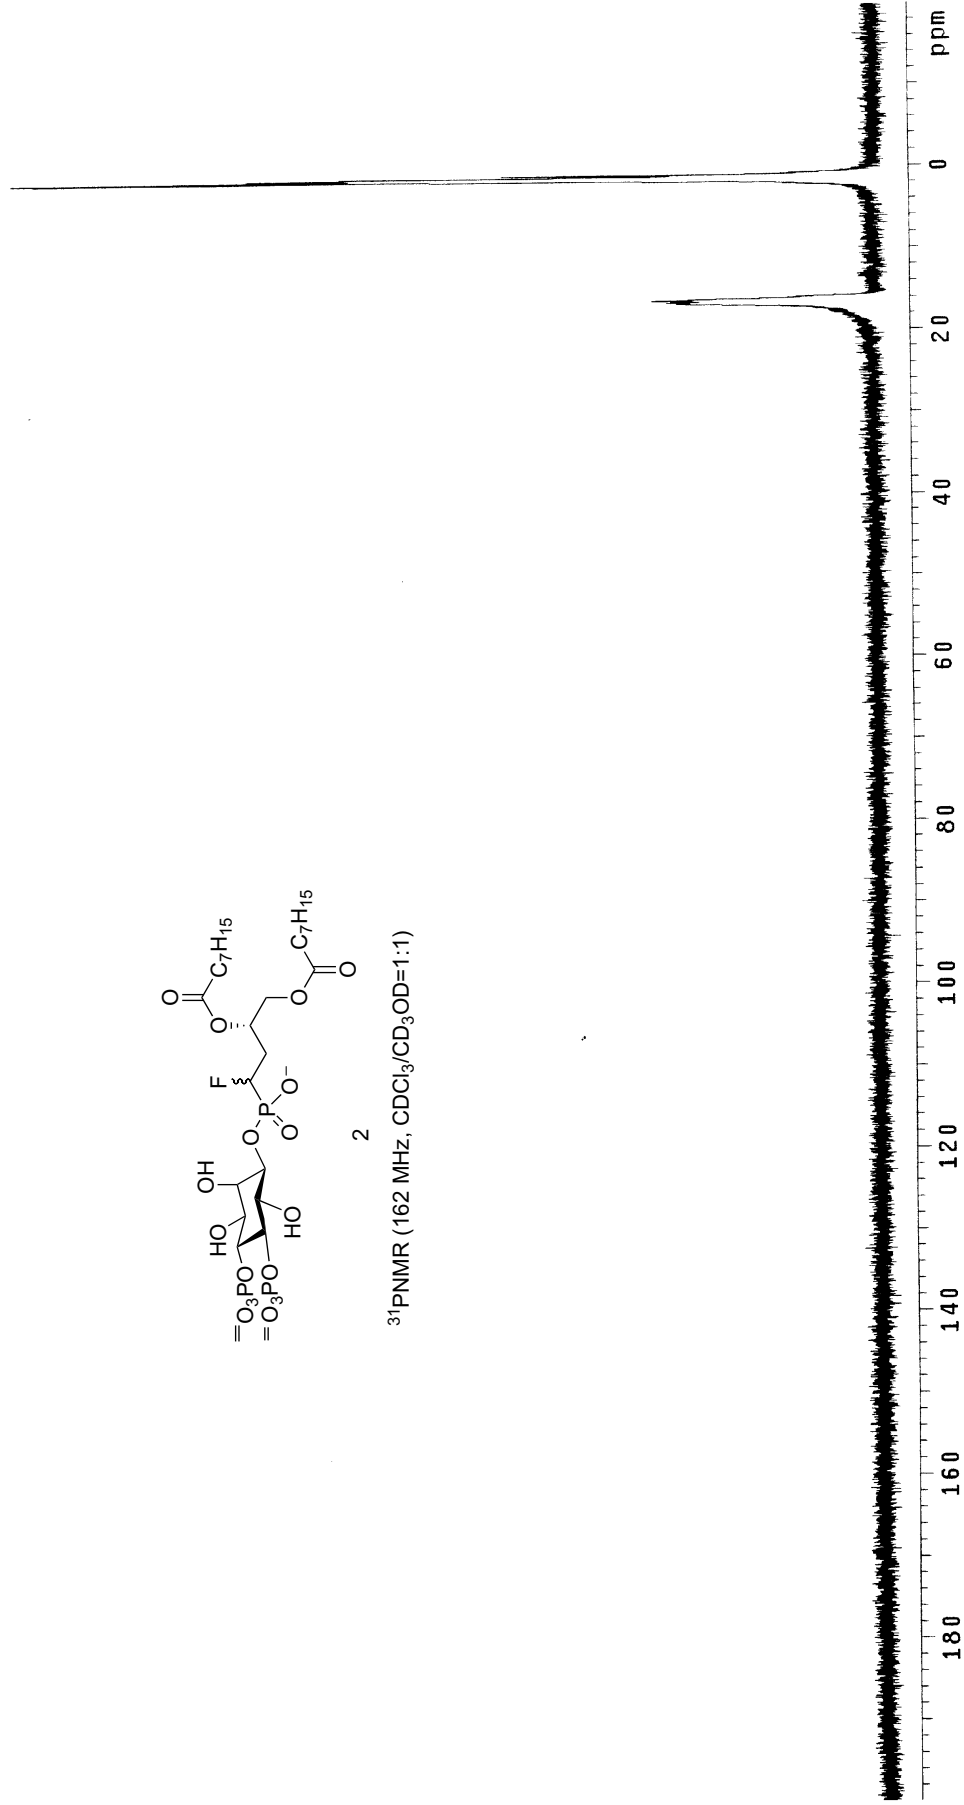

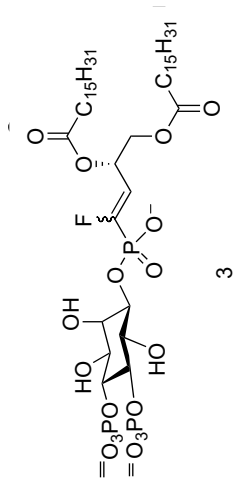

3  
<sup>1</sup>HNMR (400 MHz, CDCl<sub>3</sub>/CD<sub>3</sub>OD=1:1)

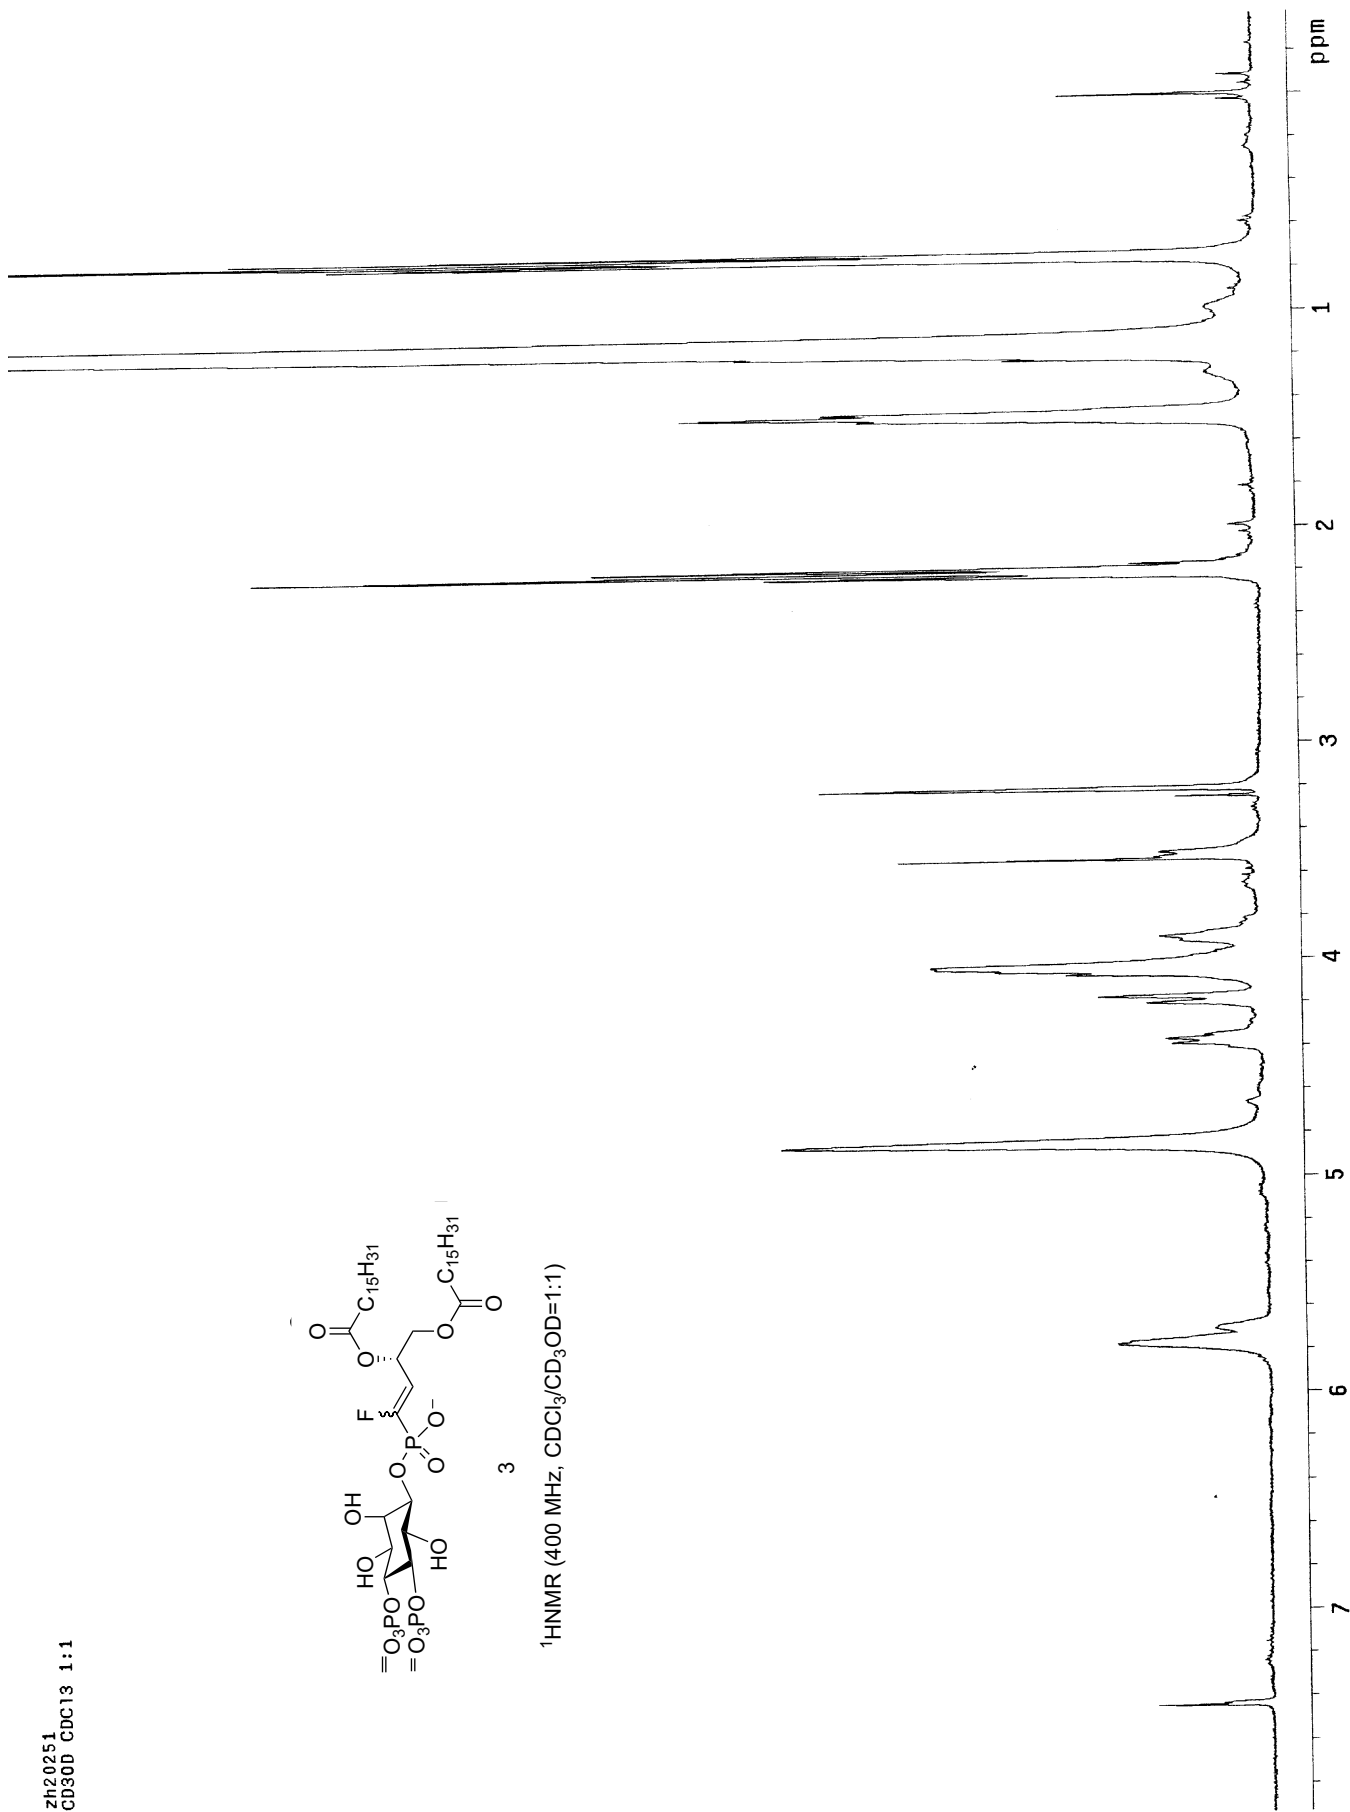

CDCl<sub>3</sub> 1:1

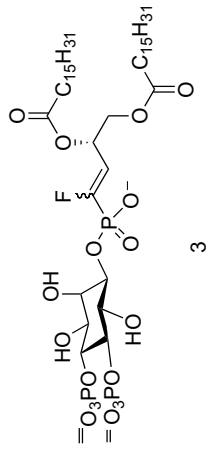

3

<sup>19</sup>F NMR (376 MHz, CDCl<sub>3</sub>/CD<sub>3</sub>OD=1:1)

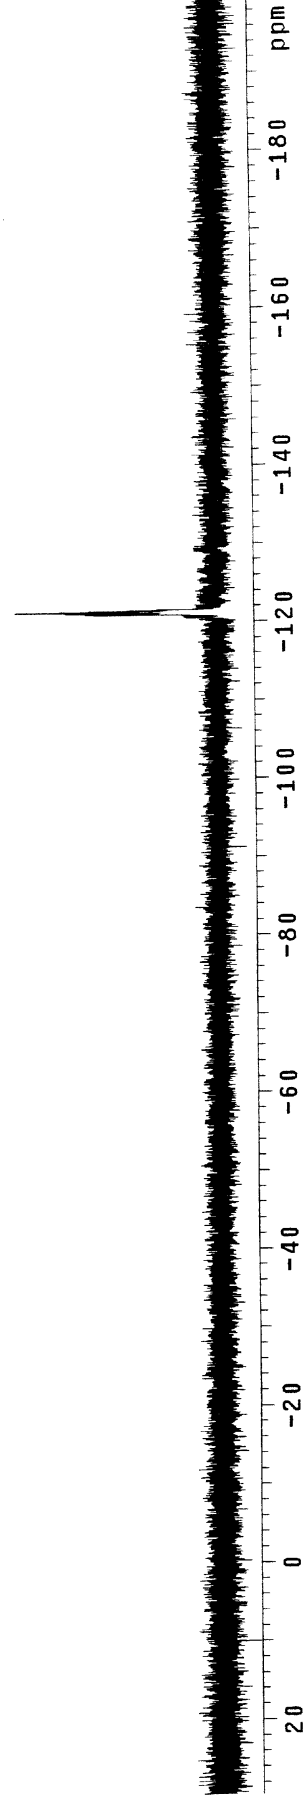

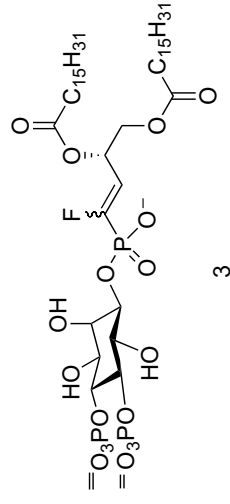

$^{31}\text{P}$ NMR (162 MHz,  $\text{CDCl}_3/\text{CD}_3\text{OD}=1:1$ )

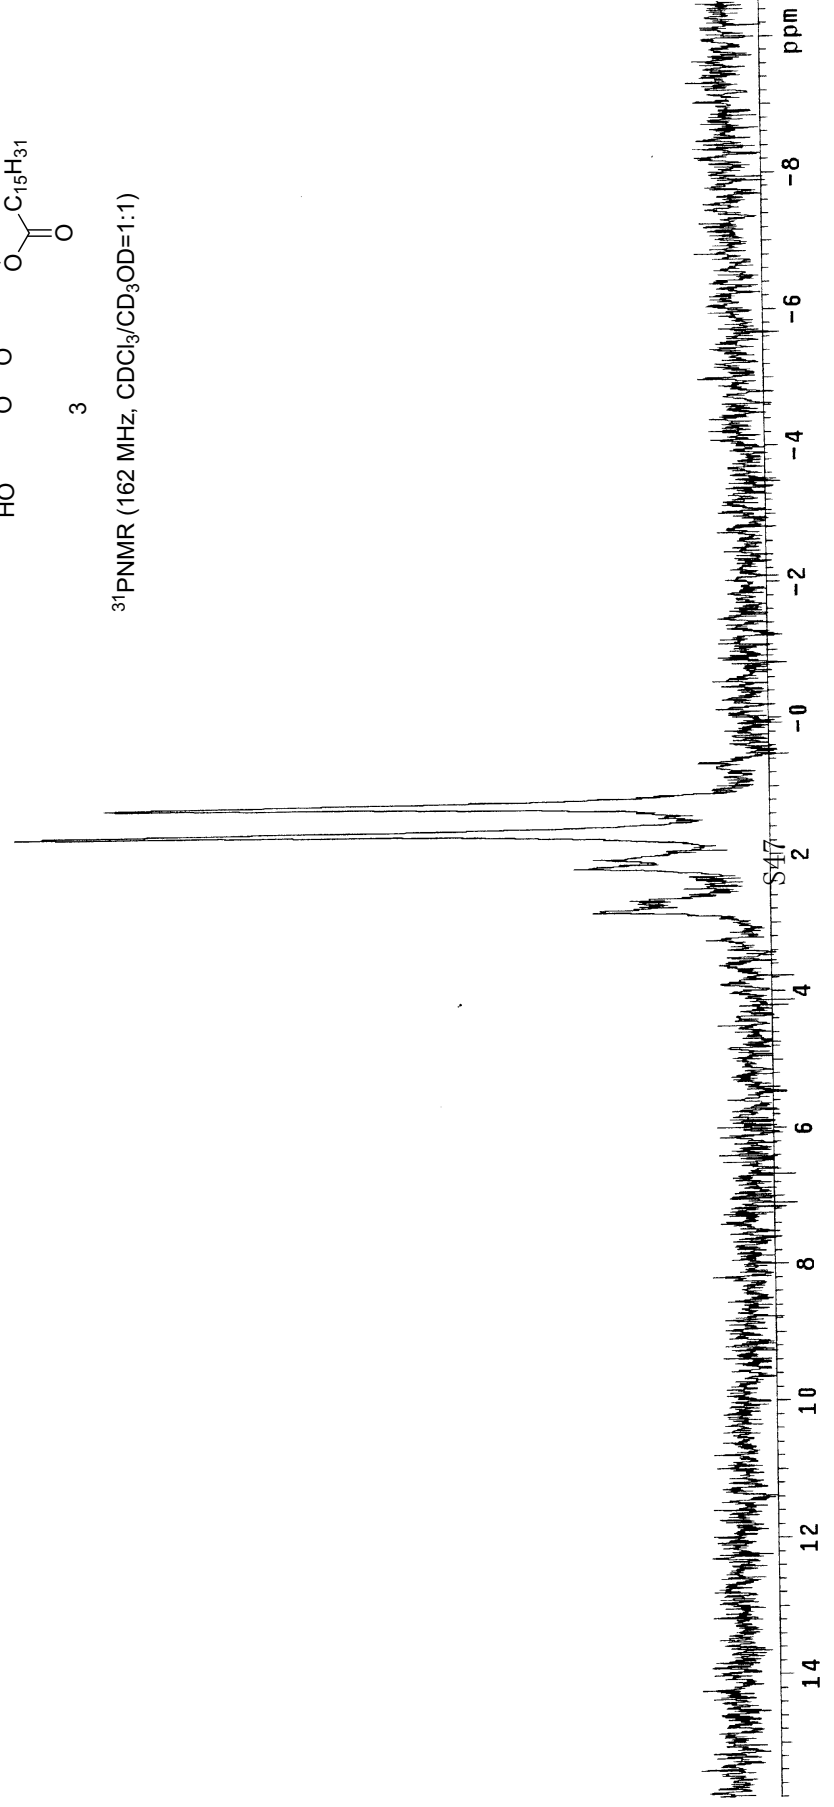

zh20271  
C0300 CDC13  
1:1

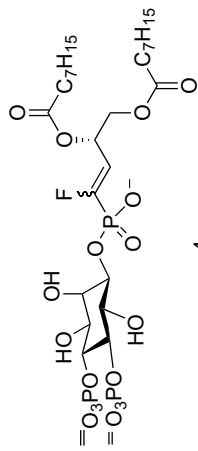

<sup>1</sup>HNMR (400 MHz, CDCl<sub>3</sub>/CD<sub>3</sub>OD=1:1)

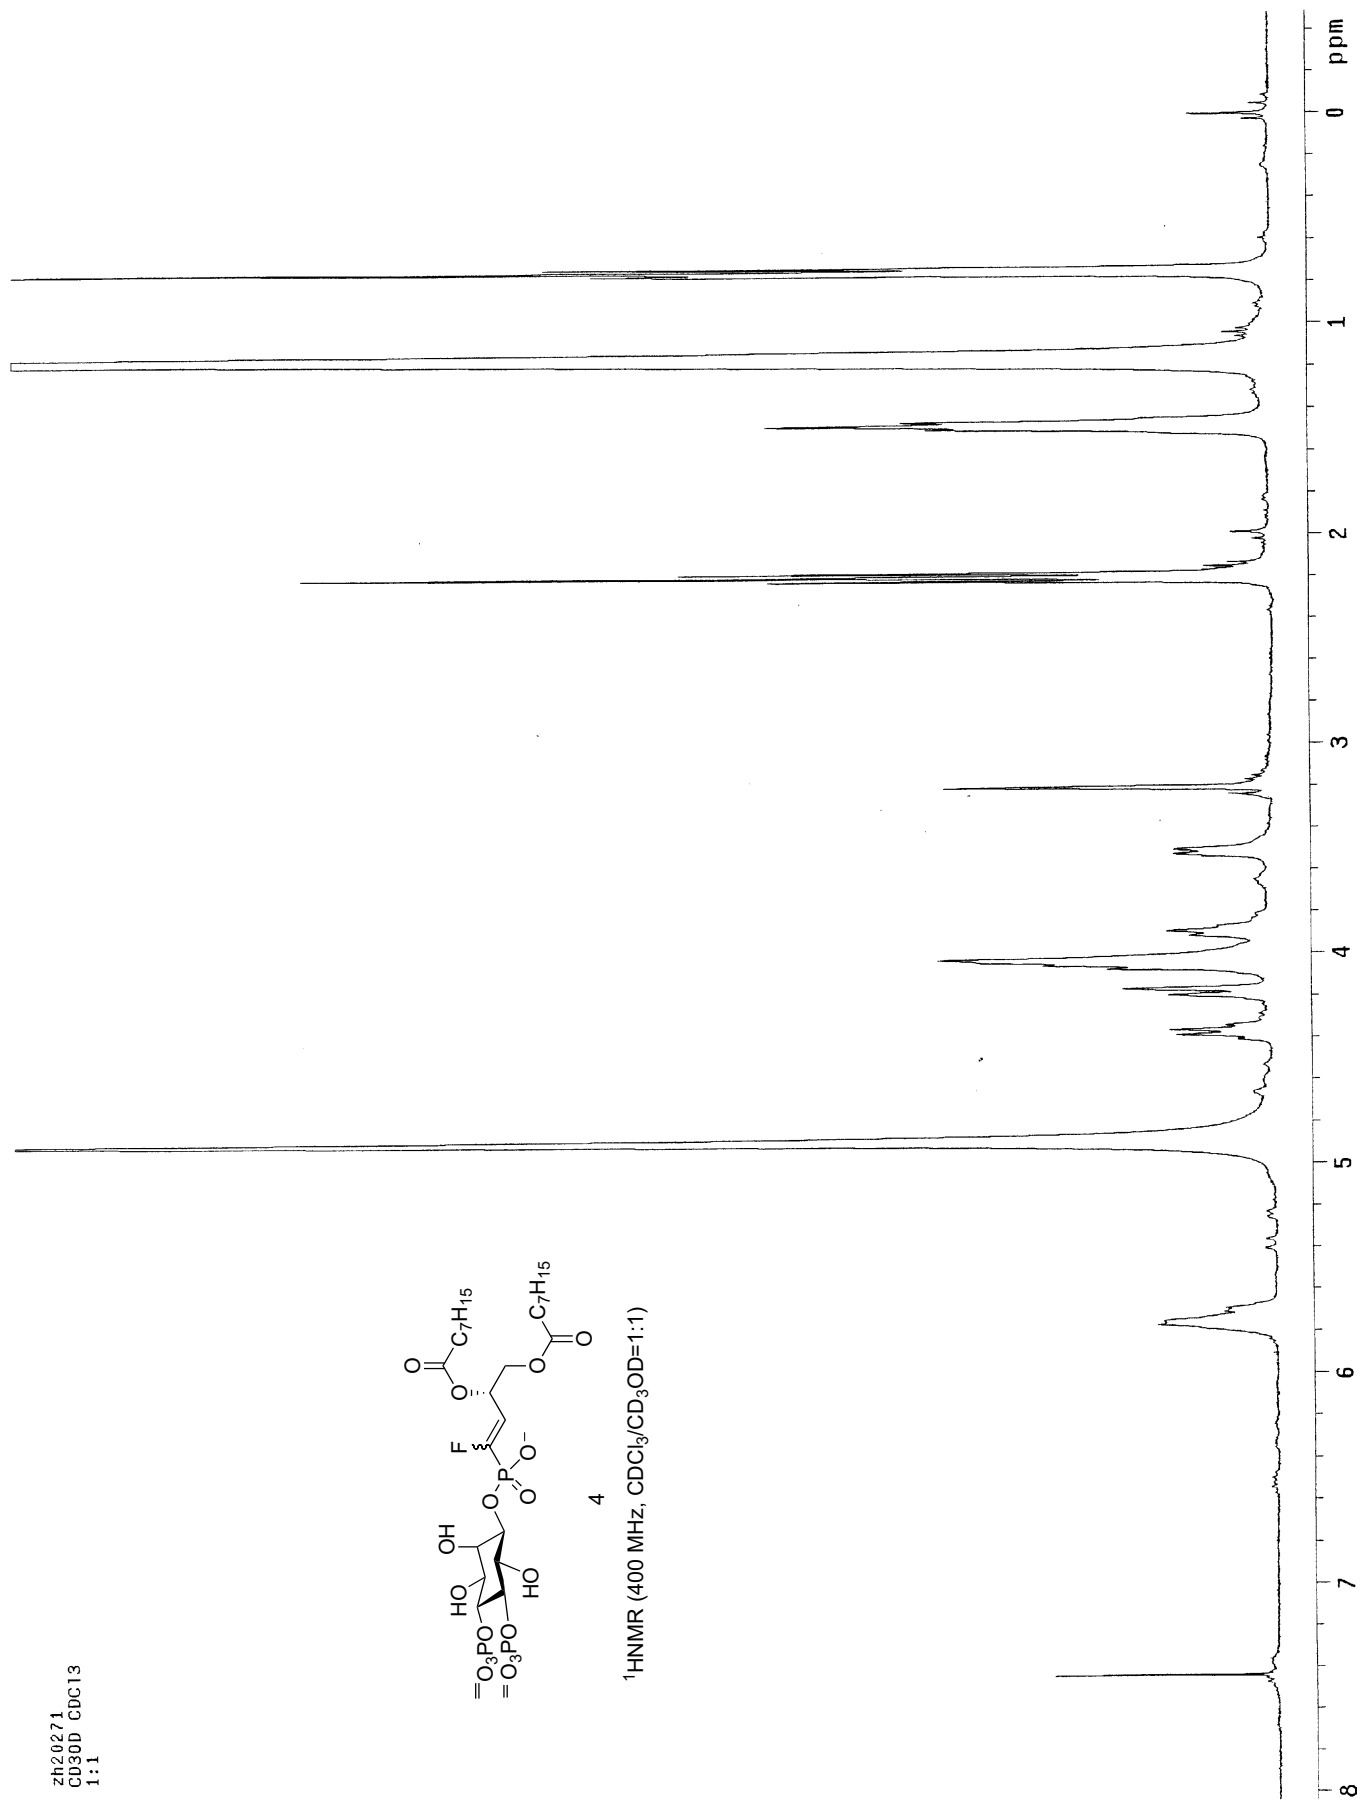



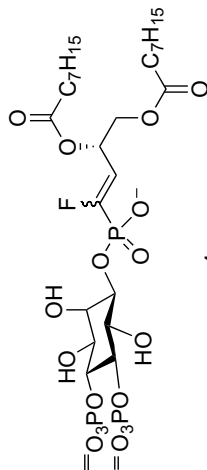

<sup>19</sup>F NMR (376 MHz, CDCl<sub>2</sub>/CD<sub>3</sub>OD=1:1)

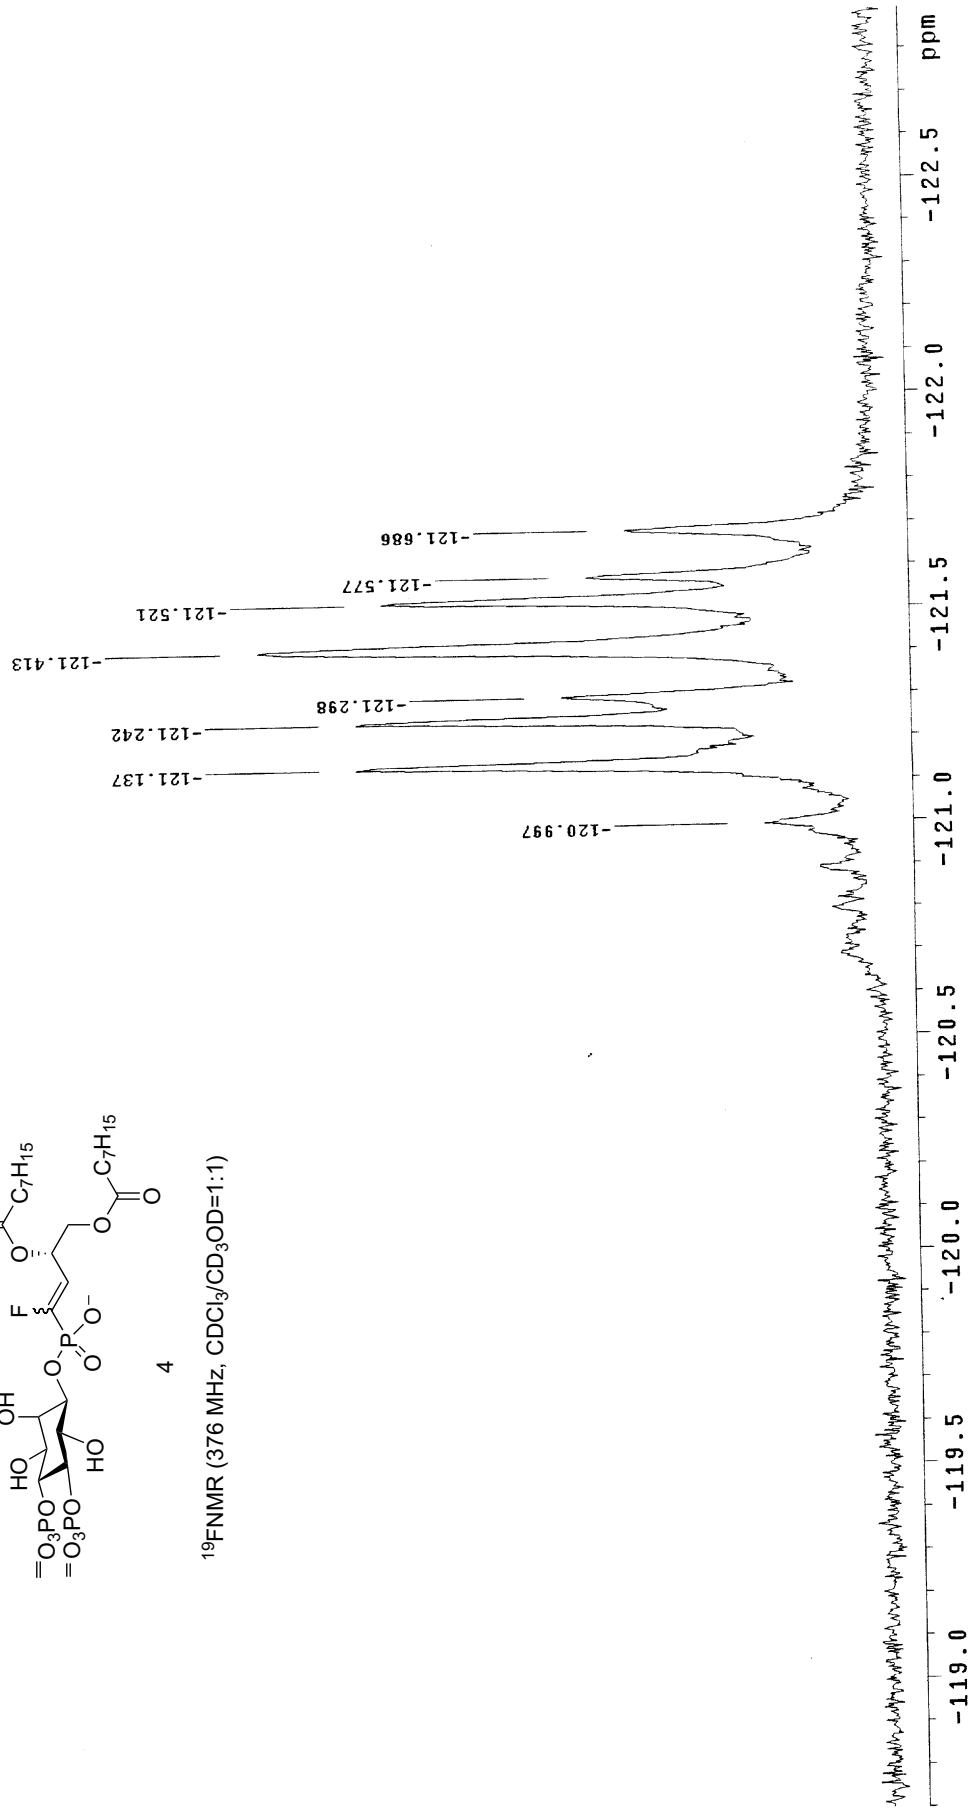

zh20271P  
CD3OD CDC13  
1:1

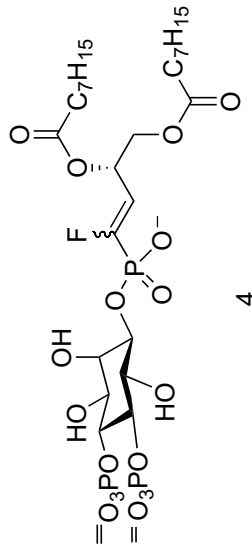

$^{31}\text{P}$ NMR (162 MHz,  $\text{CDCl}_3/\text{CD}_3\text{OD}=1:1$ )

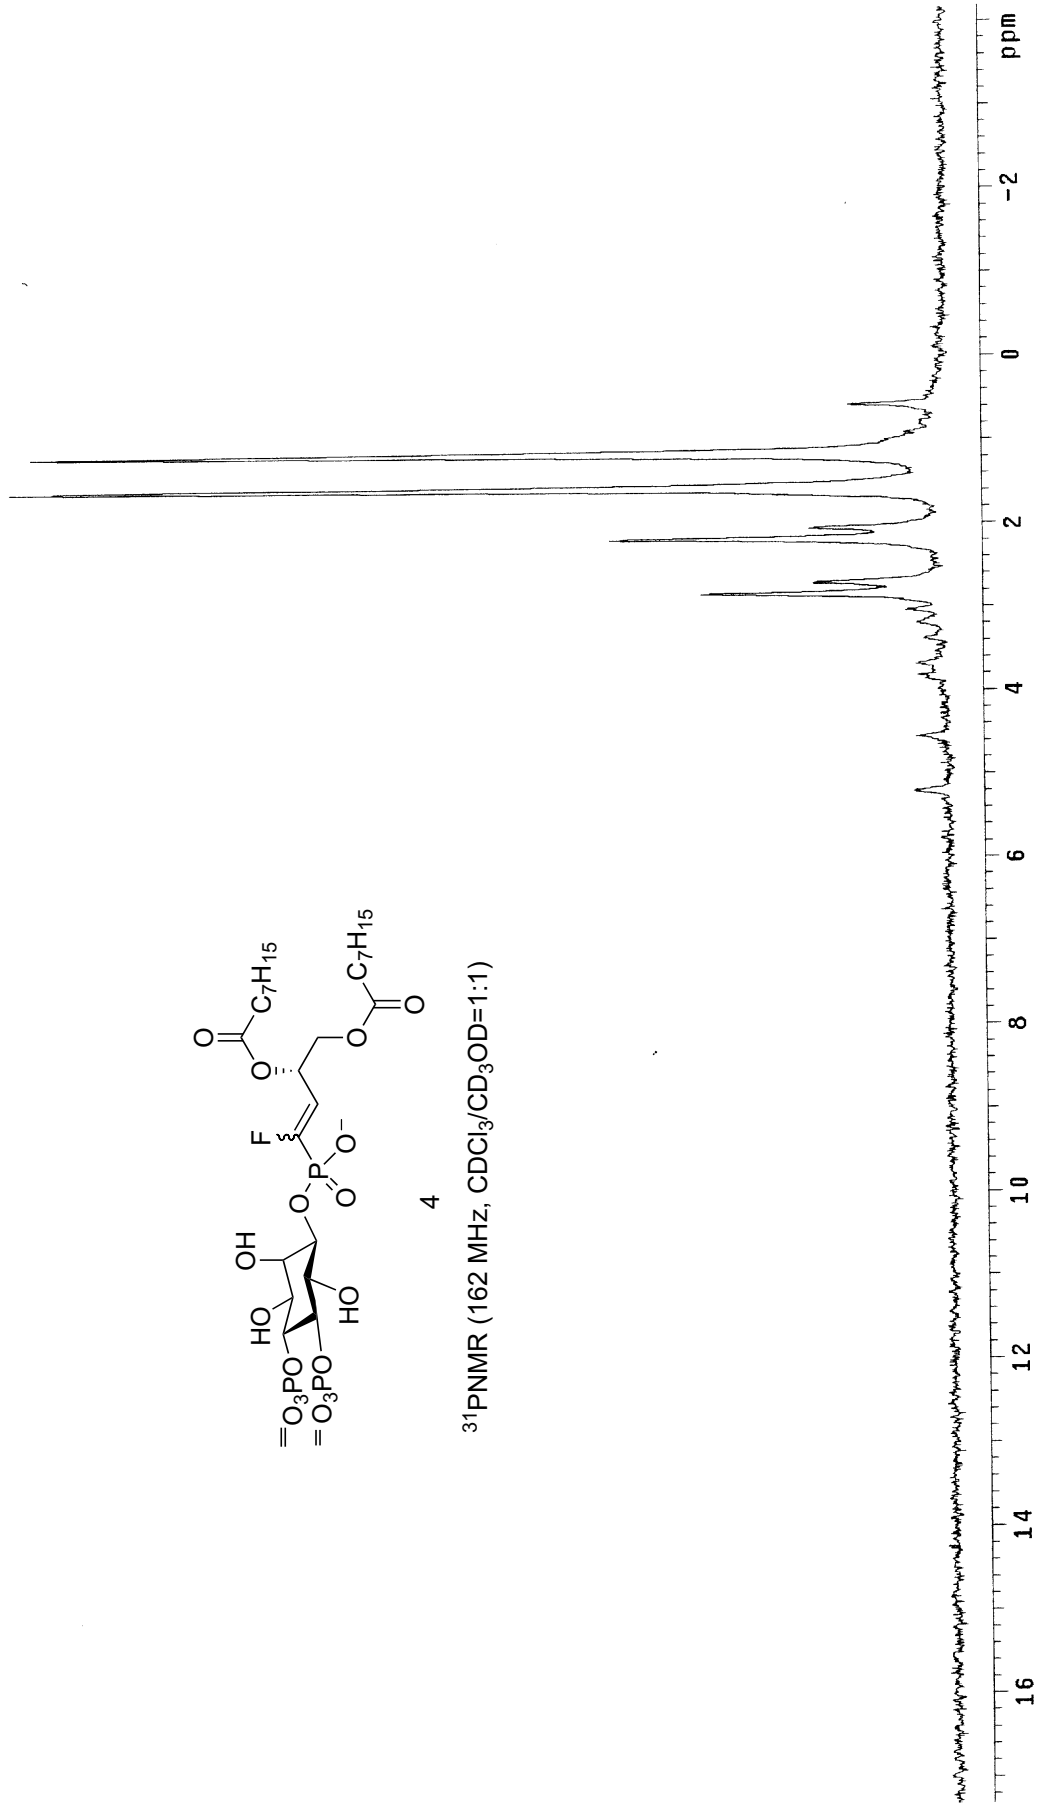

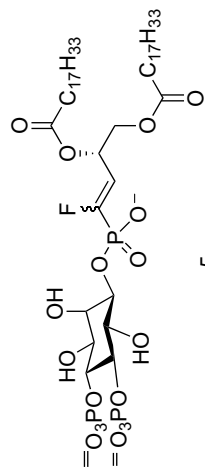

5

<sup>1</sup>H NMR (400 MHz, CDCl<sub>3</sub>/CD<sub>3</sub>OD=1:5)

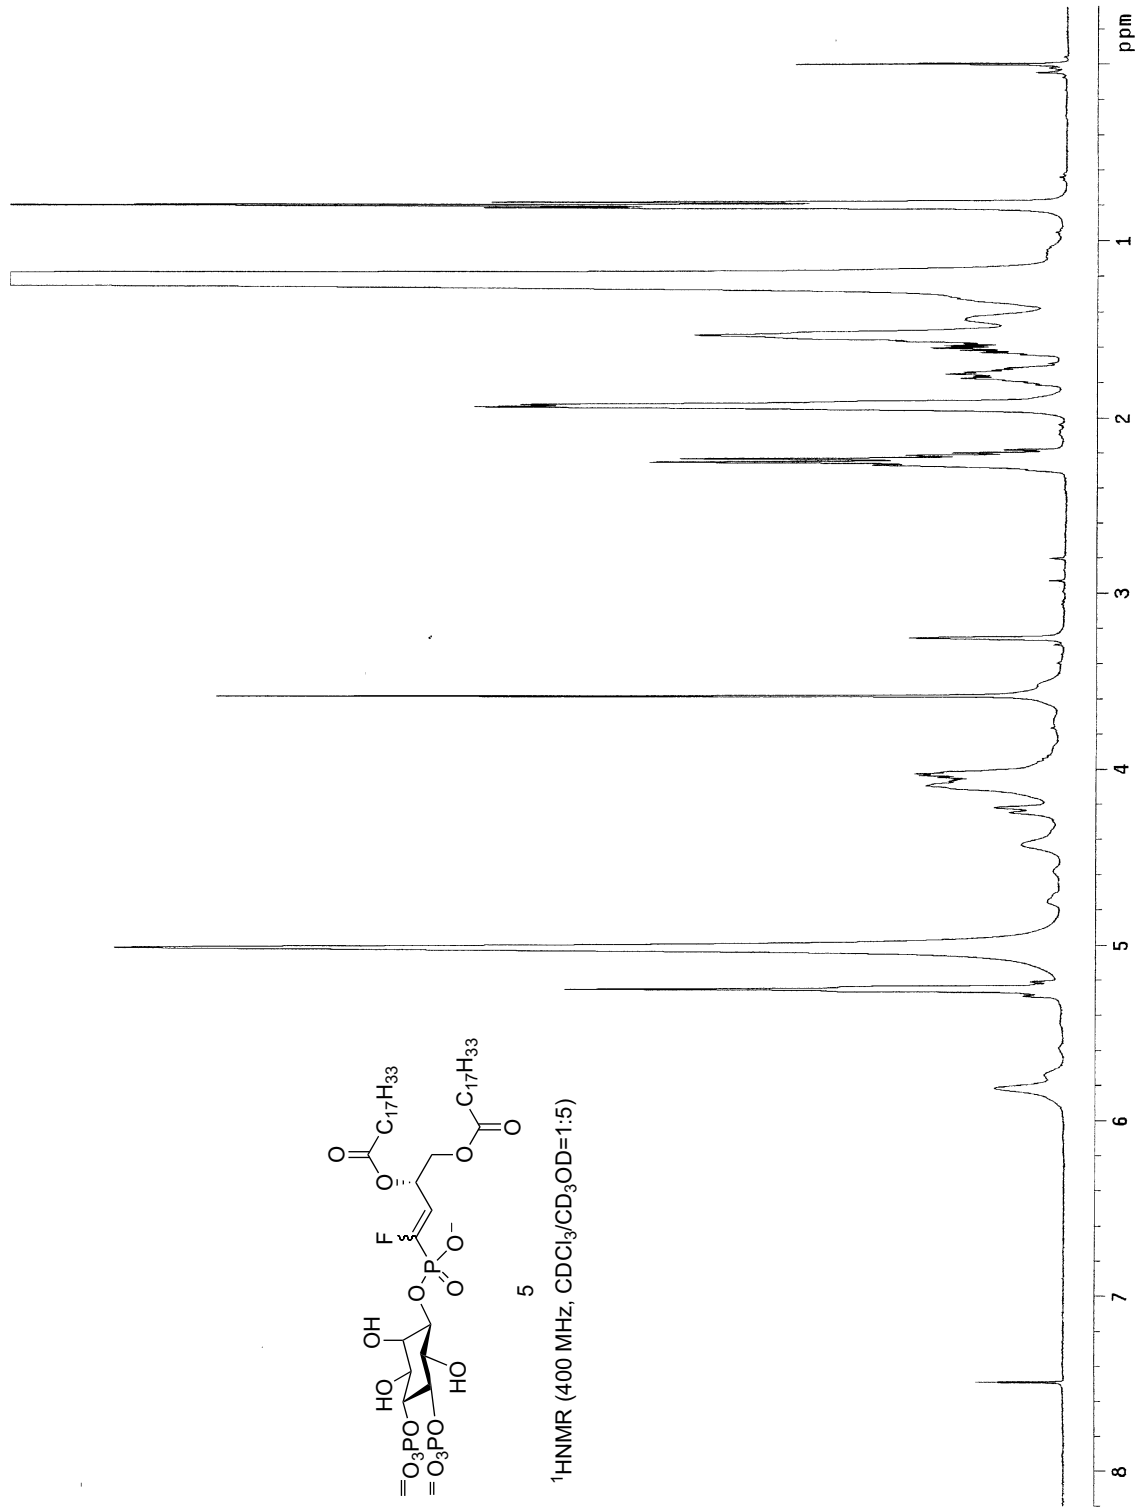

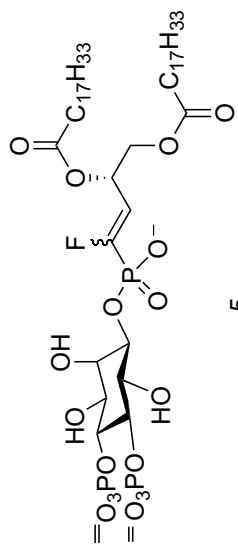

5

<sup>19</sup>F NMR (376 MHz, CDCl<sub>3</sub>/CD<sub>3</sub>OD=1:5)

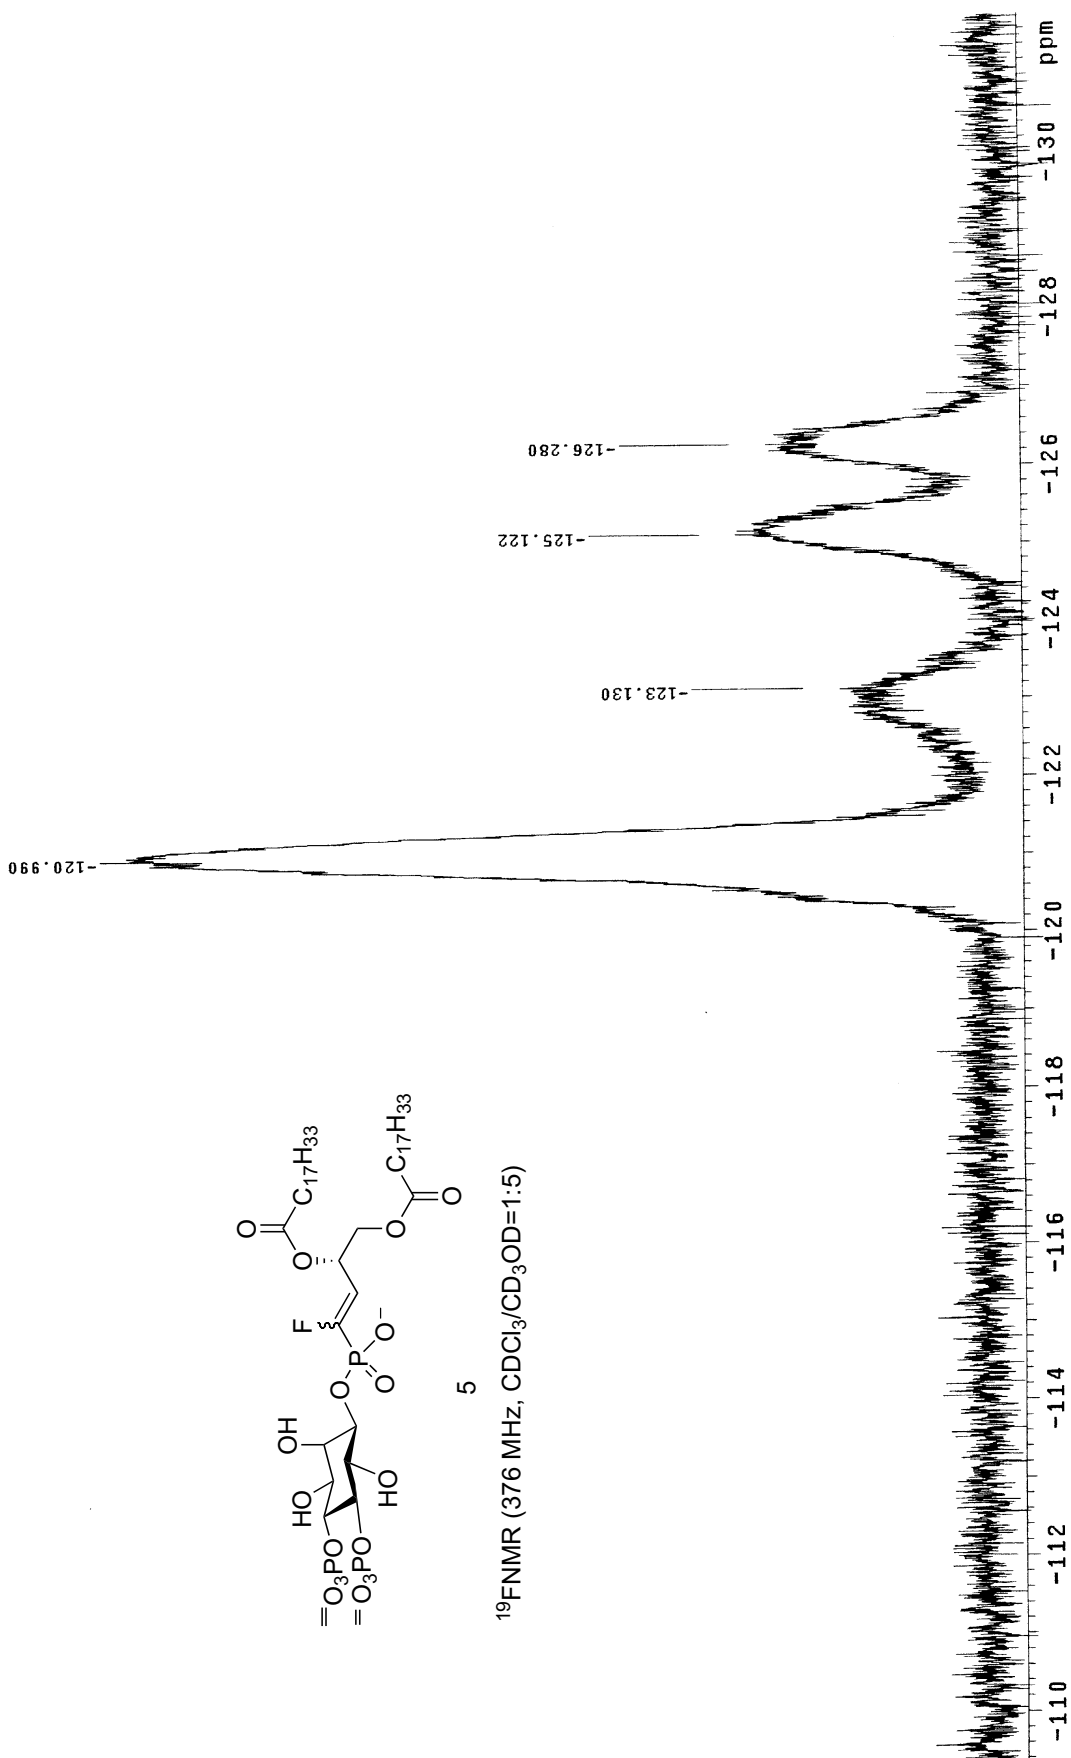

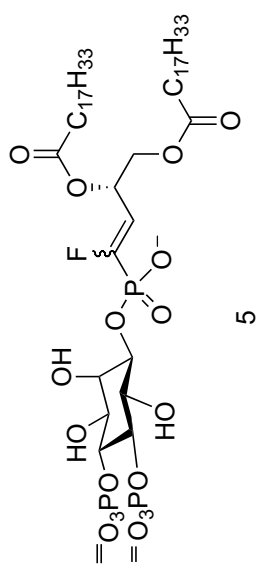

5

<sup>31</sup>P NMR (162 MHz, CDCl<sub>3</sub>/CD<sub>3</sub>OD=1:5)

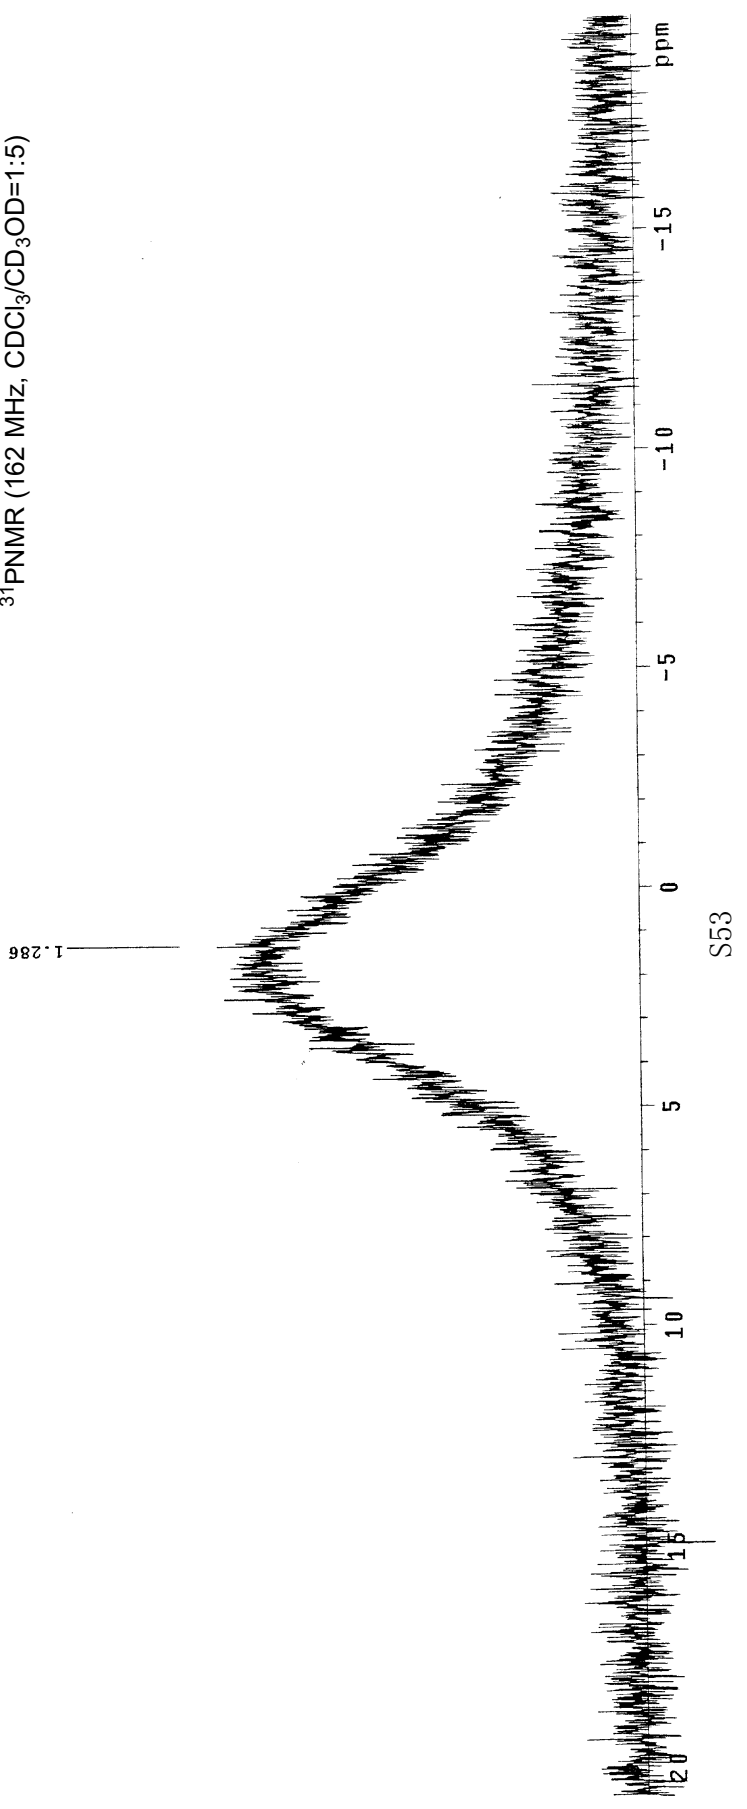

Supplement: NIHMS61027-supplement-si20060319_024.pdf [file NIHMS61027-supplement-si20060319_024.pdf]
